# Supplementary material
Source: PubMed Central journal article supplement (PMC6975276)
Supplement: ja9b07143_si_001.pdf [file ja9b07143_si_001.pdf]

**- Supporting Information -**

**A [2]Rotaxane-Based Circularly Polarized Luminescence Switch**

Arthur H. G. David, Raquel Casares, Juan M. Cuerva,\* Araceli G. Campaña, Víctor Blanco\*

*Departamento de Química Orgánica, Facultad de Ciencias, Unidad de Excelencia de Química Aplicada a Biomedicina y Medioambiente (UEQ), Universidad de Granada (UGR), Avda. Fuente Nueva S/N, 18071 Granada, Spain.*

\*E-mail: [jmCuerva@ugr.es](mailto:jmCuerva@ugr.es); [victorblancos@ugr.es](mailto:victorblancos@ugr.es)

# Table of Contents

|                                                                                                                      |            |
|----------------------------------------------------------------------------------------------------------------------|------------|
| <b>1. Experimental Section</b> .....                                                                                 | <b>S3</b>  |
| 1.1. General Methods.....                                                                                            | S3         |
| 1.2. Synthesis Overview.....                                                                                         | S4         |
| 1.2.1. Synthesis of macrocycle <b>8</b> .....                                                                        | S4         |
| 1.2.2. Synthesis of stopper <b>12</b> .....                                                                          | S6         |
| 1.2.3. Synthesis of axles ( <i>R</i> )/( <i>S</i> )- <b>11-H<sup>+</sup></b> ·PF <sub>6</sub> <sup>-</sup> .....     | S7         |
| 1.2.4. Synthesis of threads ( <i>R</i> )/( <i>S</i> )- <b>2-H<sup>+</sup></b> ·2PF <sub>6</sub> <sup>-</sup> .....   | S8         |
| 1.2.5. Synthesis of rotaxanes ( <i>R</i> )/( <i>S</i> )- <b>1-H<sup>+</sup></b> ·2PF <sub>6</sub> <sup>-</sup> ..... | S9         |
| 1.2.6. Switching of rotaxanes ( <i>R</i> )/( <i>S</i> )- <b>1</b> .....                                              | S10        |
| 1.3. Synthetic procedures and characterization details.....                                                          | S11        |
| <b>2. Additional NMR Supporting Figures</b> .....                                                                    | <b>S23</b> |
| <b>3. NMR spectra of new compounds</b> .....                                                                         | <b>S29</b> |
| <b>4. HRMS spectra of rotaxanes</b> .....                                                                            | <b>S56</b> |
| <b>5. HPLC traces</b> .....                                                                                          | <b>S61</b> |
| <b>6. Photophysical properties</b> .....                                                                             | <b>S65</b> |
| <b>7. Statistical Analysis of the CPL data</b> .....                                                                 | <b>S85</b> |
| 7.1. Statistical analysis of the CPL spectra of rotaxane ( <i>S</i> )- <b>1</b> .....                                | S85        |
| 7.1.1. Statistical analysis based on the area.....                                                                   | S85        |
| 7.1.1. Statistical analysis based on the intensity.....                                                              | S87        |
| 7.2. Statistical analysis of the CPL data of the operation cycles.....                                               | S89        |
| <b>8. Single crystal X-ray diffraction analysis</b> .....                                                            | <b>S92</b> |
| <b>9. References</b> .....                                                                                           | <b>S95</b> |

# 1. Experimental Section

## 1.1. General Methods

Unless otherwise noted, commercially available reagents, solvents and anhydrous solvents were used as purchased without further purification. Anhydrous THF was freshly distilled over Na/benzophenone. Tris[(1-benzyl-1H-1,2,3-triazol-4-yl)methyl]amine (TBTA),<sup>S1</sup> Pd(dba)<sub>2</sub>,<sup>S2</sup> Boc-L-phenylalanine,<sup>S3</sup> compounds **S1**,<sup>S4</sup> **S3**,<sup>S5</sup> **S8**,<sup>S6</sup> **6**<sup>S7</sup> and **10**<sup>S8</sup> were prepared according to literature procedures. TLC plates were purchased from Sigma-Aldrich (silica gel matrix, with fluorescent indicator 254 nm) and were stained with potassium permanganate (1% w/v in water), cerium molybdate stain (Hanessian's stain) or phosphomolybdic acid (5% ethanol solution), or observed under UV light. Flash column chromatography was performed with Silica gel 60 (230-400 mesh, Scharlab, Spain). Silica gel G preparative TLC plates (20×20cm, 500 micron), were purchased from ANALTECH. Gel permeation chromatography was performed with Biobeads<sup>®</sup> SX-1 resin beads. <sup>1</sup>H and <sup>13</sup>C NMR spectra were recorded at room temperature on a Varian Inova Unity (300 MHz), Varian Direct Drive (500 MHz), Bruker Avance III HD NanoBay (400 MHz) or Bruker Avance Neo (400 MHz or 500 MHz) spectrometers at a constant temperature of 298 K. Chemical shifts are given in ppm and referenced to the signal of the residual protiated solvent (<sup>1</sup>H:  $\delta = 7.26$  for CDCl<sub>3</sub>,  $\delta = 2.05$  for acetone-*d*<sub>6</sub> and  $\delta = 2.55$  for DMSO-*d*<sub>6</sub> at room temperature) or the <sup>13</sup>C signal of the solvents (<sup>13</sup>C:  $\delta = 77.16$  for CDCl<sub>3</sub> and  $\delta = 39.52$  for DMSO-*d*<sub>6</sub>) or to the signal of the residual TMS (<sup>1</sup>H:  $\delta = 0.00$ ). Coupling constant (*J*) values are given in Hz. Abbreviations indicating multiplicity were used as follow: m = multiplet, p = quintet, q = quartet, t = triplet, d = doublet, s = singlet, br = broad. Signals were assigned by means of 2D NMR spectroscopy (COSY, HSQC, HMBC). Electrospray (ESI) HRMS spectra were recorded on a Waters Xevo G2-XS QTOF or a Waters LCT Premier XE spectrometer. Electronic impact (EI) HRMS spectra were recorded on a Bruker Maxis II spectrometer. IR spectra were recorded with a Perkin-Elmer Spectrum Two FTIR ATR spectrometer. Optical rotations were recorded on a Perkin-Elmer 341 polarimeter.

## 1.2. Synthesis Overview

### 1.2.1. Synthesis of macrocycle 8

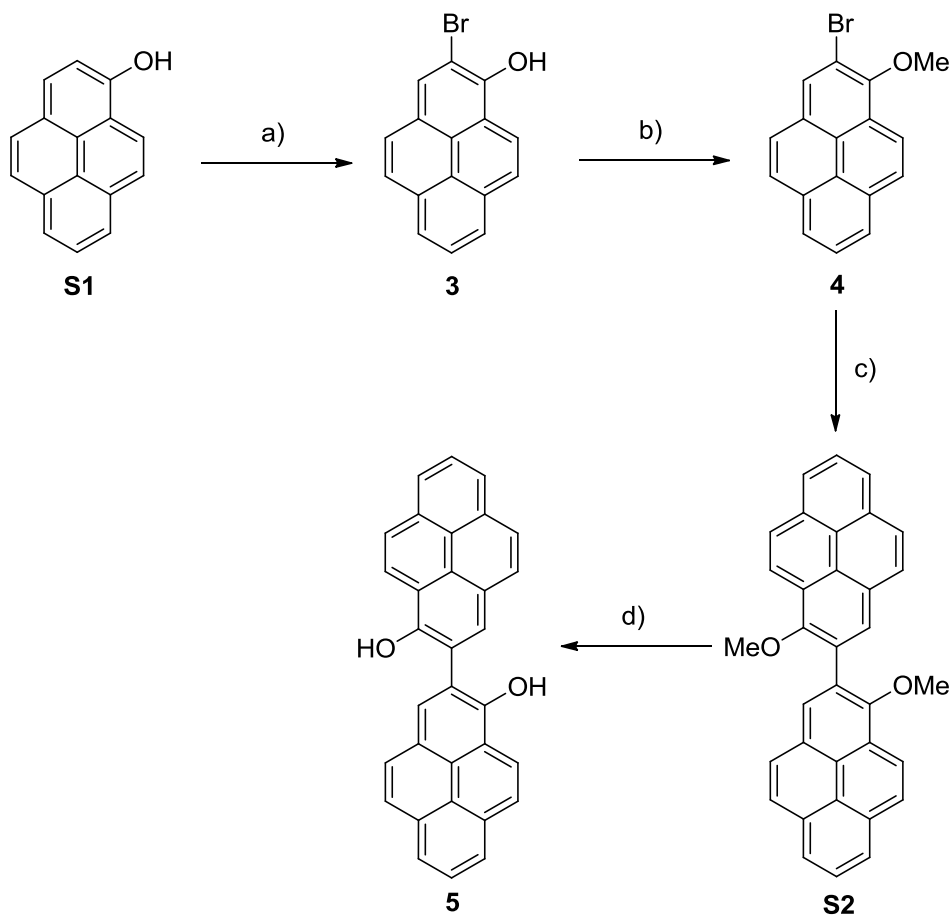

**Scheme S1.** Synthesis of compound 5. Reagents and conditions: a)  $\text{Br}_2$ ,  $t\text{BuNH}_2$ , toluene,  $-78^\circ\text{C}$  to r.t., 6 h, 67%; b)  $\text{MeI}$ ,  $\text{K}_2\text{CO}_3$ , acetone,  $0^\circ\text{C}$  to reflux, 18 h, 83%; c)  $t\text{BuLi}$ ,  $\text{Pd}(\text{dba})_2$ , XPhos, toluene, r.t., 20 h, 79%; d)  $\text{BF}_3 \cdot \text{SMe}_2$ ,  $\text{CH}_2\text{Cl}_2$ , r.t., 6 h, 26%.

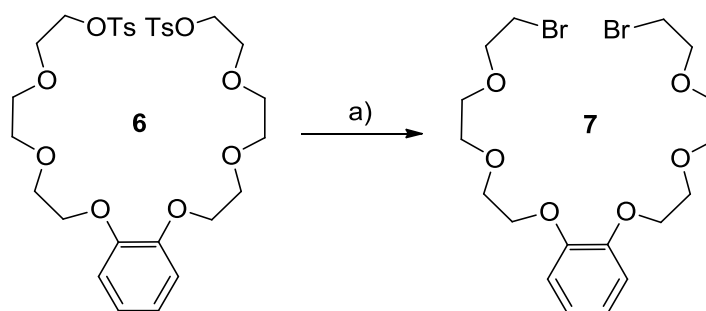

**Scheme S2.** Synthesis of compound 7. Reagents and conditions: a)  $\text{LiBr}$ , acetone, reflux, O/N, 92%.

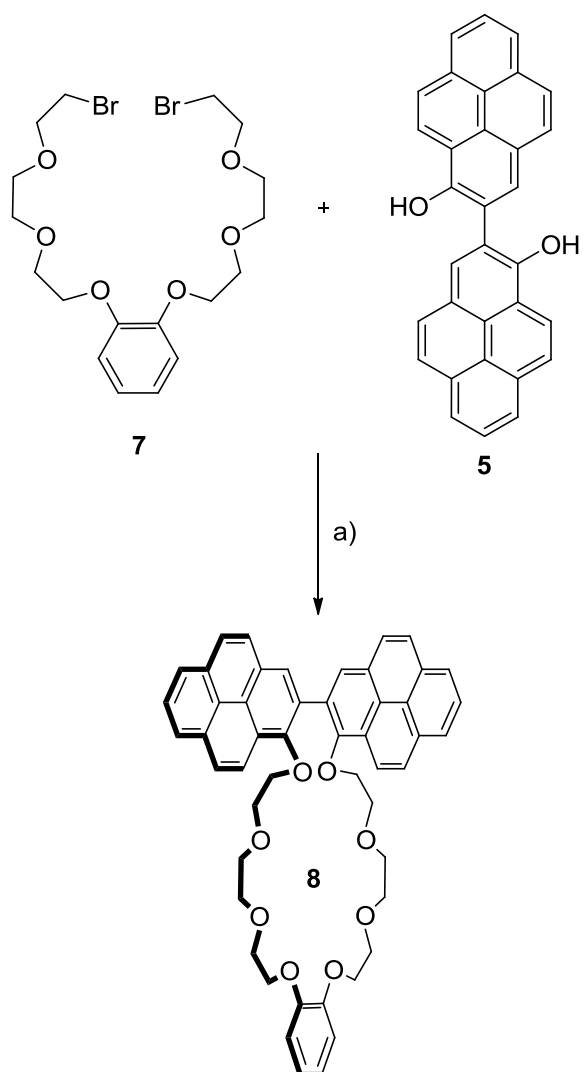

**Scheme S3.** Synthesis of macrocycle **8**. Reagents and conditions: a)  $t$ BuOK,  $KPF_6$ ,  $n$ Bu<sub>4</sub>NI, 0.6 mM, dioxane, r.t. to reflux, 24 h, 34%.

### 1.2.2. Synthesis of stopper 12

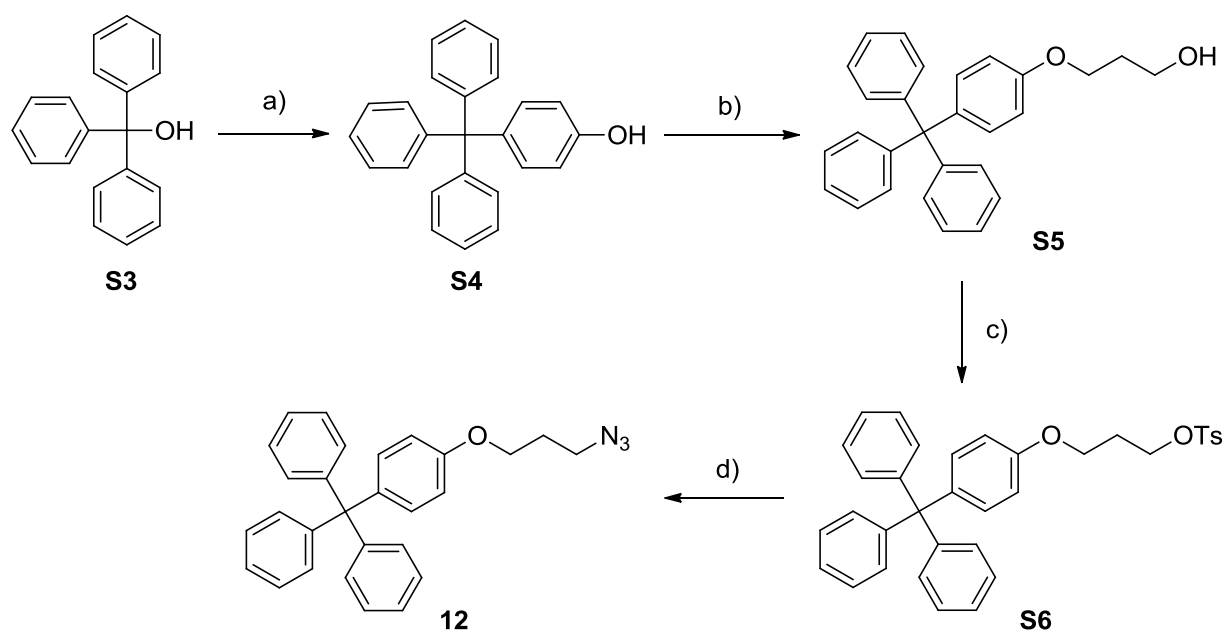

**Scheme S4:** Synthesis of stopper **12**. Reagents and conditions: a) Phenol,  $HCl_{(aq)}$  (37%), 160 °C, 6 h, 60%; b)  $K_2CO_3$ , 3-Bromo-1-propanol, acetone, reflux, 24 h, 98%; c) TsCl,  $Et_3N$ , DMAP<sub>(cat)</sub>,  $CH_2Cl_2$ , r.t., O/N, 87%; d)  $NaN_3$ , DMF, 70 °C, 15 h, 73%.

### 1.2.3. Synthesis of axes (*R*)/(*S*)-11- $\text{H}^+\cdot\text{PF}_6^-$

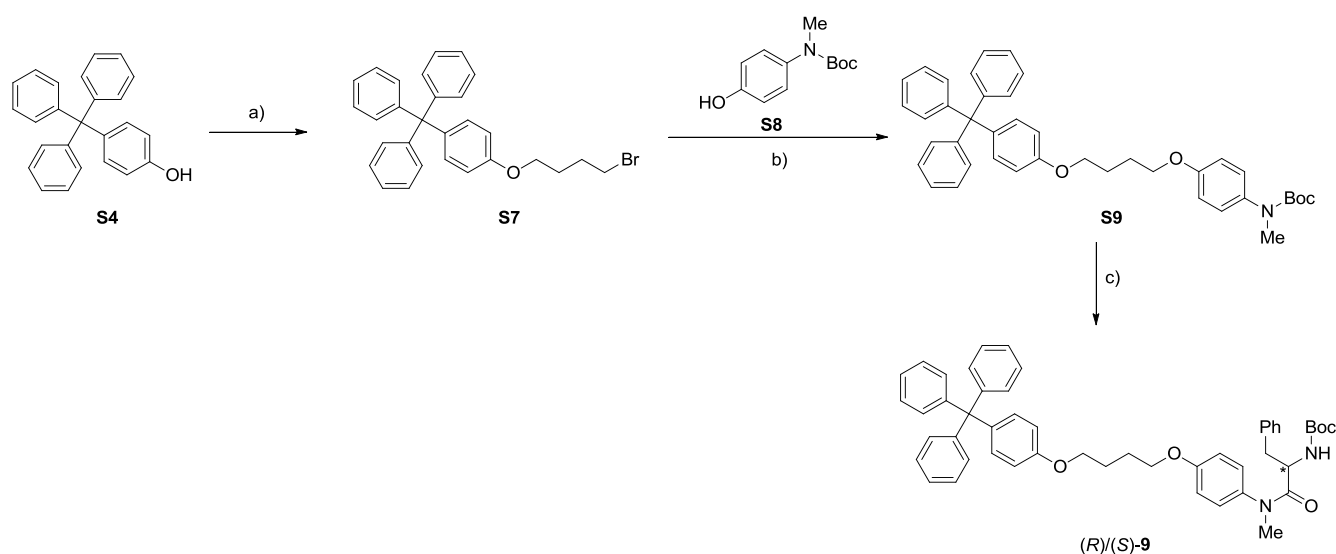

**Scheme S5:** Synthesis of compounds (*R*)/(*S*)-**9**. Reagents and conditions: a) 1,4-Dibromobutane,  $\text{K}_2\text{CO}_3$ ,  $\text{CH}_3\text{CN}$ ,  $75\text{ }^\circ\text{C}$ , O/N, 54%; b) **S8**,  $\text{Cs}_2\text{CO}_3$ , DMF,  $70\text{ }^\circ\text{C}$ , O/N, 59%; c) 1.  $\text{CF}_3\text{CO}_2\text{H}$ ,  $\text{CH}_2\text{Cl}_2$ , r.t., 4 h; 2. Boc-D-phenylalanine (or Boc-L-phenylalanine), HOBT, EDCl, DIPEA,  $\text{CH}_2\text{Cl}_2$ ,  $0\text{ }^\circ\text{C}$  to r.t., 19 h, 60% (for (*R*)-**9**) and 66% (for (*S*)-**9**).

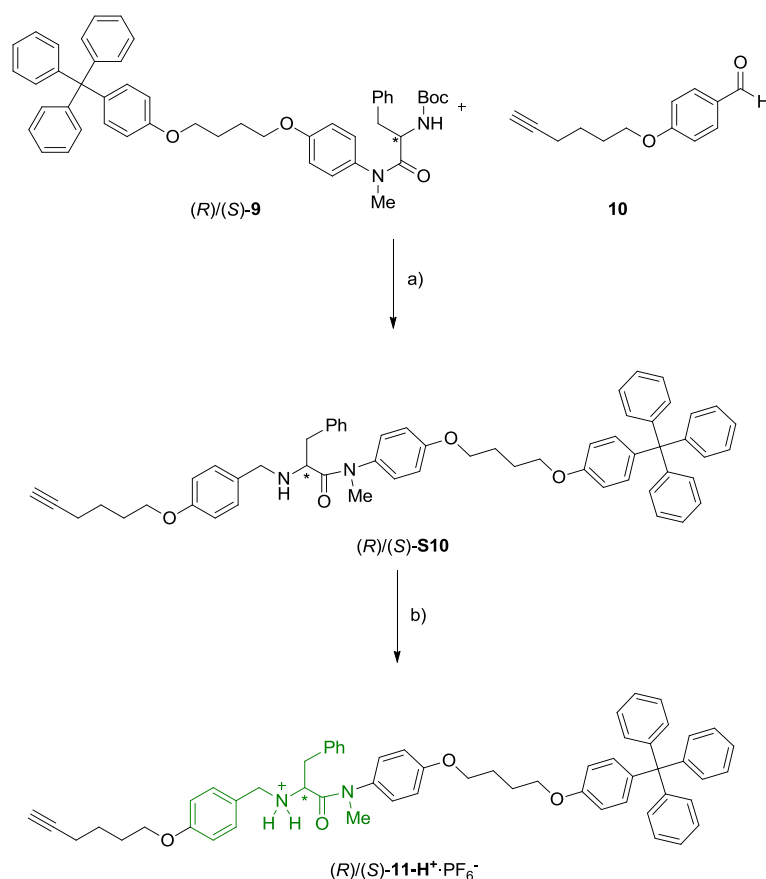

**Scheme S6:** Synthesis of axes (*R*)/(*S*)-**11- $\text{H}^+\cdot\text{PF}_6^-$** . Reagents and conditions: a) 1.  $\text{CF}_3\text{CO}_2\text{H}$ ,  $\text{CH}_2\text{Cl}_2$ , r.t., 4 h; 2. **10**,  $\text{Et}_3\text{N}$ , MeOH, r.t., 24 h; 3.  $\text{NaBH}_4$ , THF/MeOH, r.t., 18 h, 32% (for (*R*)-**S10**) and 34% (for (*S*)-**S10**); b) 1. HCl (1.0 M in  $\text{Et}_2\text{O}$ ),  $\text{CH}_2\text{Cl}_2$ , r.t., 8 h; 2.  $\text{KPF}_6$ ,  $\text{CH}_2\text{Cl}_2$ /acetone/ $\text{H}_2\text{O}$ , r.t., 16 h, 98% (for (*R*)-**11- $\text{H}^+\cdot\text{PF}_6^-$** ) and 91% (for (*S*)-**11- $\text{H}^+\cdot\text{PF}_6^-$** ).

### 1.2.4. Synthesis of threads (*R*)/(*S*)-**2-H<sup>+</sup>**·2PF<sub>6</sub><sup>-</sup>

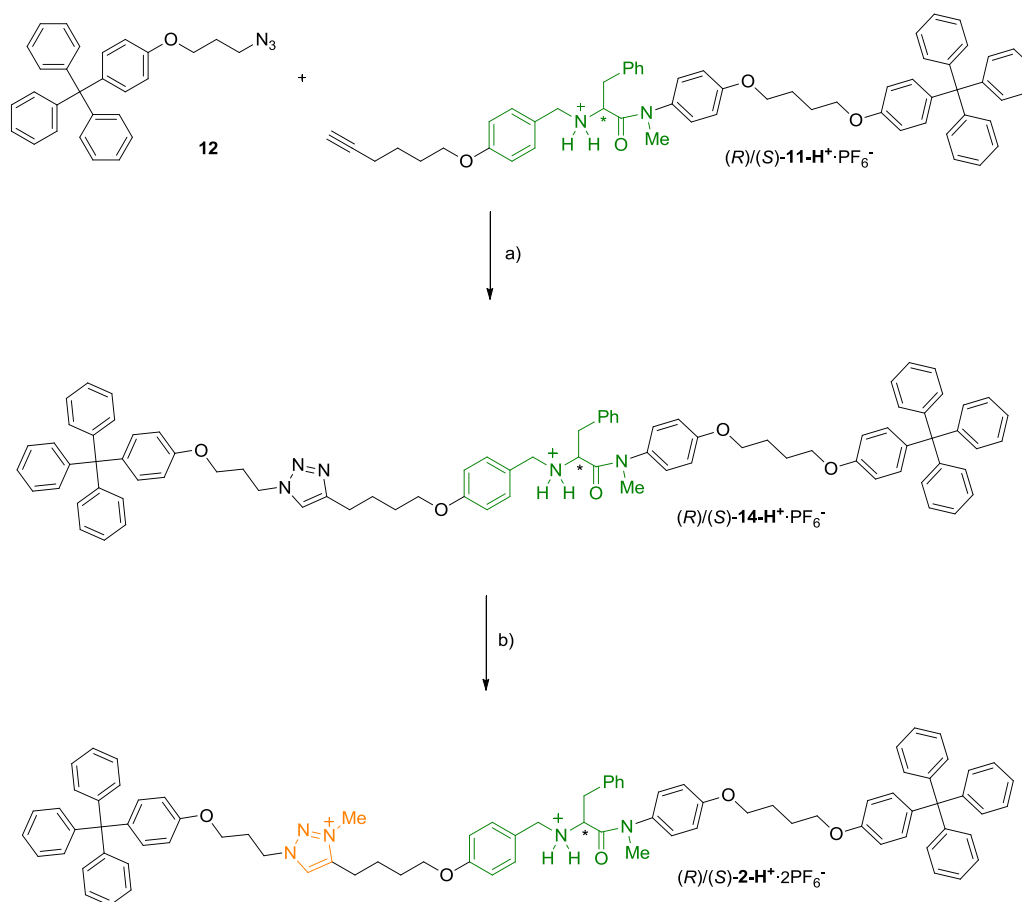

**Scheme S7:** Synthesis of threads (*R*)/(*S*)-**2-H<sup>+</sup>**·2PF<sub>6</sub><sup>-</sup>. Reagents and conditions: a) Cu(CH<sub>3</sub>CN)<sub>4</sub>PF<sub>6</sub>, TBTA, CH<sub>2</sub>Cl<sub>2</sub>, r.t., 48 h, 95% (for *R*)-**14-H<sup>+</sup>**·PF<sub>6</sub><sup>-</sup>) and 59% (for *S*)-**14-H<sup>+</sup>**·PF<sub>6</sub><sup>-</sup>); b) 1. MeI, r.t., 4 d; 2. KPF<sub>6</sub>, CH<sub>2</sub>Cl<sub>2</sub>/acetone/H<sub>2</sub>O, r.t., 18 h, 58% (for *R*)-**2-H<sup>+</sup>**·2PF<sub>6</sub><sup>-</sup>) and 98% (for *S*)-**2-H<sup>+</sup>**·2PF<sub>6</sub><sup>-</sup>).



### 1.2.5. Synthesis of rotaxanes (*R*)/(*S*)-**1**-H<sup>+</sup>·2PF<sub>6</sub><sup>-</sup>

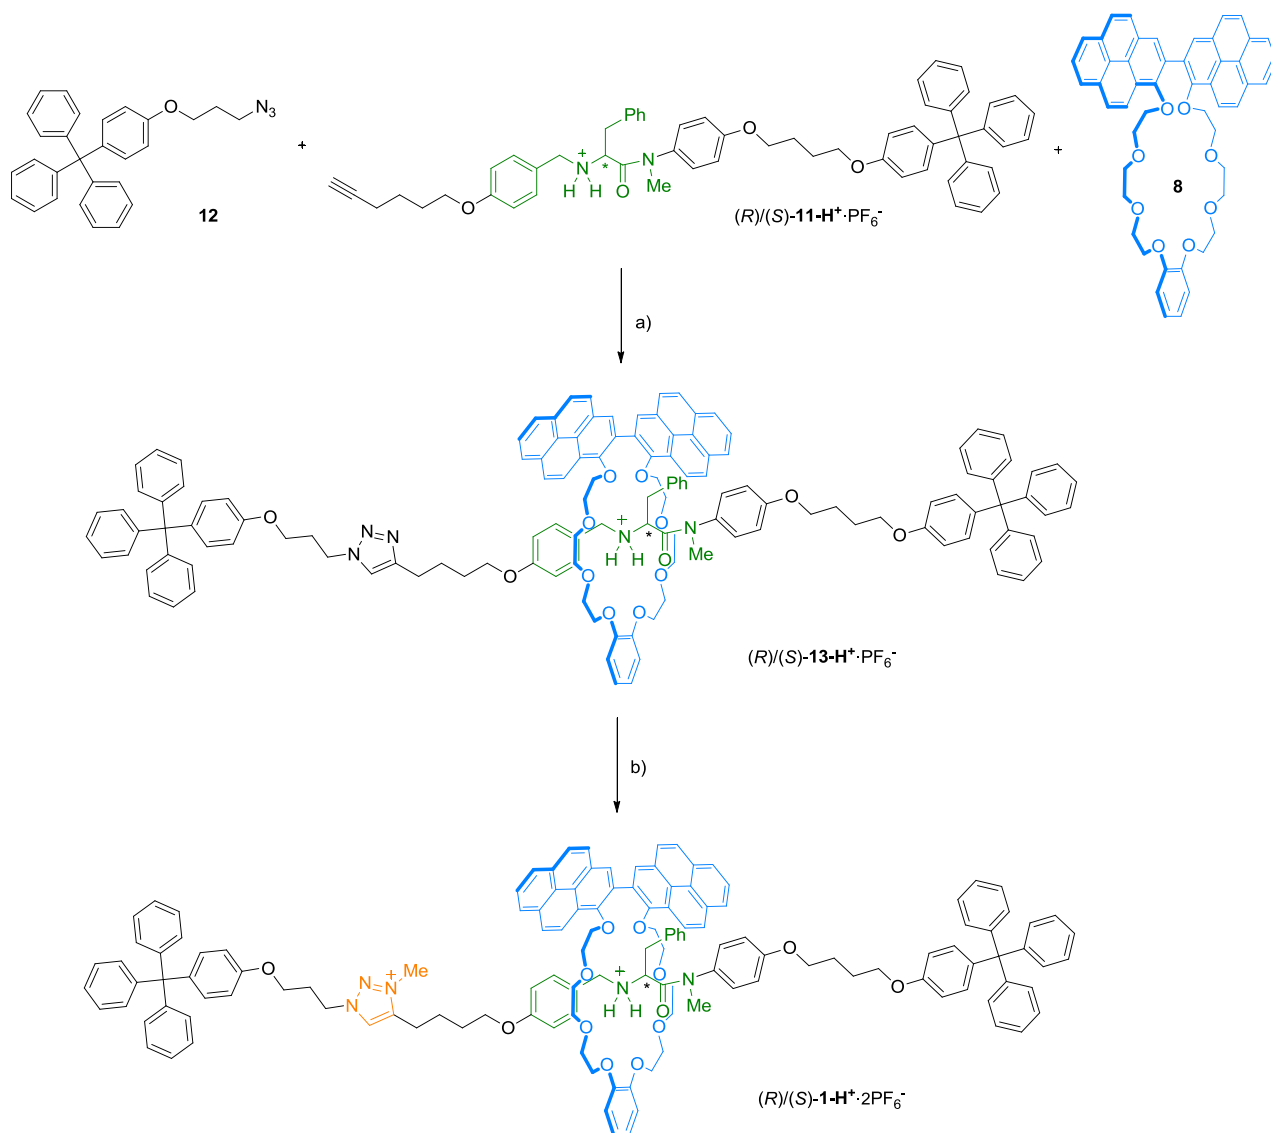

**Scheme S8:** Synthesis of rotaxanes (*R*)/(*S*)-**1**-H<sup>+</sup>·2PF<sub>6</sub><sup>-</sup>: Reagents and conditions: a) Cu(CH<sub>3</sub>CN)<sub>4</sub>PF<sub>6</sub>, TBTA, CH<sub>2</sub>Cl<sub>2</sub>, r.t., 3 d, 35% (for (*R*)-**13**-H<sup>+</sup>·PF<sub>6</sub><sup>-</sup>) and 19% (for (*S*)-**13**-H<sup>+</sup>·PF<sub>6</sub><sup>-</sup>); b) 1. MeI, r.t., 4 d; 2. KPF<sub>6</sub>, CH<sub>2</sub>Cl<sub>2</sub>/acetone/H<sub>2</sub>O, r.t., 5 h, 68% (for (*R*)-**1**-H<sup>+</sup>·2PF<sub>6</sub><sup>-</sup>) and 55% (for (*S*)-**1**-H<sup>+</sup>·2PF<sub>6</sub><sup>-</sup>).

### 1.2.6. Switching of rotaxanes (R)/(S)-1

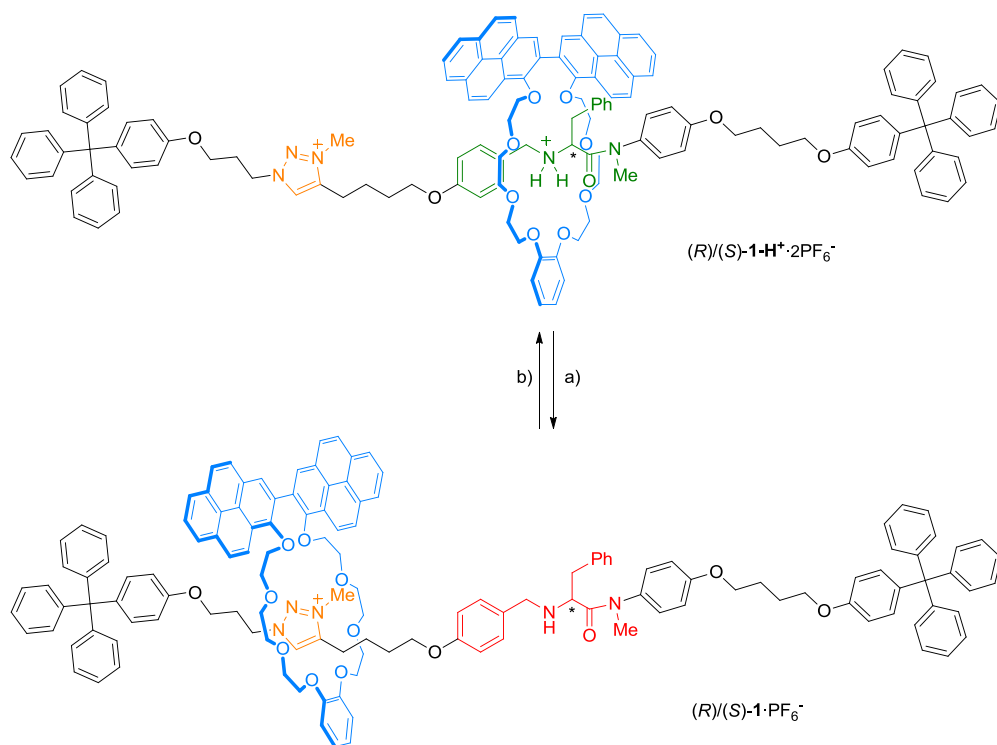

**Scheme S9:** Switching of rotaxanes (R)/(S)-1: Reagents and conditions: a)  $K_2CO_3$ ,  $CHCl_3$ , r.t., 1 min; b)  $CF_3CO_2H$ ,  $CHCl_3$ , r.t., 1 min.

### 1.3. Synthetic procedures and characterization details

#### Compound 3:

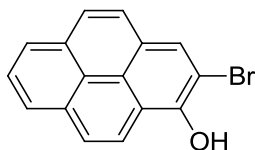

Compound **3** was prepared according to Koreeda's procedure:<sup>S4</sup> To a degassed solution of <sup>t</sup>BuNH<sub>2</sub> (1.50 mL, 14.5 mmol) in anhydrous toluene (20 mL) at -30 °C was added rapidly Br<sub>2</sub> (400 μL, 7.95 mmol). The solution was stirred for 30 min at -30 °C and cooled to -78 °C. In another round-bottom flask, a solution of **S1** (1.58 g, 7.23 mmol) and <sup>t</sup>BuNH<sub>2</sub> (0.750 mL, 7.23 mmol) in anhydrous toluene (150 mL) was stirred for 20 min at -78 °C. The bromine solution was then added to the pyrene solution. The resulting mixture was stirred for 30 min at -78 °C and then warmed up slowly to room temperature over 6 h. To this mixture was added EtOAc (200 mL). The organic layer was washed with H<sub>2</sub>O (2 × 200 mL) and brine (200 mL). The organic layer was dried over anhydrous Na<sub>2</sub>SO<sub>4</sub> and the solvent was evaporated under vacuum. The crude material was purified by column chromatography (SiO<sub>2</sub>, CH<sub>2</sub>Cl<sub>2</sub>/hexane 40:60) to afford **3** (1.45 g, 67%) as a yellow solid.

<sup>1</sup>H NMR (300 MHz, acetone-*d*<sub>6</sub>) δ = 8.87 (s, 1H), 8.47 (d, *J* = 9.3 Hz, 1H), 8.44 (s, 1H), 8.25 – 8.15 (m, 3H), 8.05 (d, *J* = 7.6 Hz, 1H), 8.02 (m, 2H). Spectral data agree with those previously reported.<sup>S4</sup>

#### Compound 4:

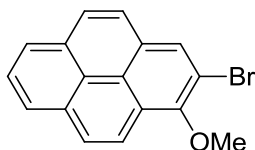

Under inert atmosphere, to a solution of **3** (744 mg, 2.50 mmol) in anhydrous acetone (50 mL), at 0 °C, were added K<sub>2</sub>CO<sub>3</sub> (1.70 g, 12.5 mmol) and iodomethane (315 μL, 5.00 mmol). The solution was stirred for 30 min at 0 °C and then, refluxed for 18 h. The solvent was removed under reduced pressure and the solid was dissolved in a mixture of CH<sub>2</sub>Cl<sub>2</sub>/H<sub>2</sub>O (1:1, 150 mL). Layers were separated and the aqueous one was extracted with CH<sub>2</sub>Cl<sub>2</sub> (75 mL). The combined organic layers were dried over anhydrous Na<sub>2</sub>SO<sub>4</sub> and the solvent was evaporated under vacuum. The crude material was purified by column chromatography (SiO<sub>2</sub>, CH<sub>2</sub>Cl<sub>2</sub>/hexane 20:80) to give **4** (650 mg, 83%) as a yellow solid.

<sup>1</sup>H NMR (500 MHz, CDCl<sub>3</sub>): δ = 8.32 – 8.27 (m, 2H), 8.13 (m, 2H), 8.07 (d, *J* = 9.1 Hz, 1H), 8.01 – 7.93 (m, 2H), 7.84 (d, *J* = 9.0 Hz, 1H), 4.14 (s, 3H). <sup>13</sup>C NMR (126 MHz, CDCl<sub>3</sub>): δ = 150.89, 130.97, 130.95, 129.12, 128.52, 128.45, 127.55, 126.46, 126.05, 125.57, 125.55, 125.45, 125.07, 124.60, 121.21, 115.17, 62.42. IR (neat): ν = 3046, 2934, 1588, 1480, 1421, 1254, 1107, 1003, 840, 826, 783, 737. HR-MS (EI<sup>+</sup>): *m/z*: 310.0007 [M]<sup>+</sup> (calcd for C<sub>17</sub>H<sub>11</sub>OBr: 309.9993).

## Compound S2:

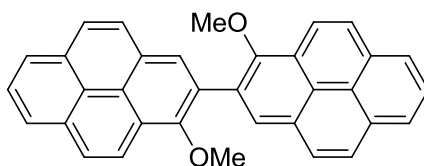

**Caution!** The <sup>t</sup>BuLi solution in pentane is a pyrophoric liquid as <sup>t</sup>BuLi catches fire spontaneously if exposed to air. Although we did not experience any problem, this reagent should be handled with care under inert atmosphere and adequate safety measures should be taken during the synthesis. Moreover, the reaction should not be scaled up.

Compound **S2** was prepared by adapting the methodology developed by Feringa and co-workers:<sup>S9</sup> **4** (602 mg, 1.94 mmol), Pd(dba)<sub>2</sub> (333 mg, 0.581 mmol) and XPhos (553 mg, 1.16 mmol) were dissolved in degassed anhydrous toluene (20 mL). To this solution was added <sup>t</sup>BuLi (1.6 M in pentane, 1.80 mL, 2.90 mmol) over 2 h using a syringe pump at room temperature. The solution was further stirred for 18 h at room temperature. The mixture was concentrated and the crude was purified by column chromatography (SiO<sub>2</sub>, CH<sub>2</sub>Cl<sub>2</sub>/hexane 40:60) to yield **S2** (362 mg, 79%) as a yellow solid.

<sup>1</sup>H NMR (400 MHz, CDCl<sub>3</sub>): δ = 8.54 (d, *J* = 9.2 Hz, 2H), 8.43 (s, 2H), 8.26 – 8.16 (m, 6H), 8.13 – 8.02 (m, 6H), 3.69 (s, 6H). <sup>13</sup>C NMR (101 MHz, CDCl<sub>3</sub>): δ = 152.67, 131.53, 131.48, 130.17, 128.22, 127.84, 127.78, 127.35, 126.83, 126.42, 125.92, 125.13, 125.05, 125.03, 124.54, 122.03, 62.46. IR (neat): ν = 2924, 2852, 1730, 1597, 1464, 1246, 1006, 842, 830, 760. HR-MS (ESI<sup>+</sup>): *m/z*: 463.1685 [M+H]<sup>+</sup> (calcd for C<sub>34</sub>H<sub>23</sub>O<sub>2</sub>: 463.1698).

## Compound 5:

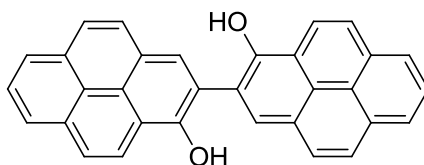

Under an Ar atmosphere, to a solution of **S2** (833 mg, 1.80 mmol) in anhydrous CH<sub>2</sub>Cl<sub>2</sub> (80 mL) was added BF<sub>3</sub>·SMe<sub>2</sub> (2.30 mL, 21.6 mmol). The solution was stirred for 6 h at room temperature and then diluted with CH<sub>2</sub>Cl<sub>2</sub> (200 mL). The mixture was washed with HCl<sub>(aq)</sub> (5%, 200 mL). Layers were separated and the aqueous one was extracted with CH<sub>2</sub>Cl<sub>2</sub> (2 × 200 mL). The combined organic layers were dried over anhydrous Na<sub>2</sub>SO<sub>4</sub> and the solvent was evaporated under reduced pressure. The crude material was purified by column chromatography (SiO<sub>2</sub>, CH<sub>2</sub>Cl<sub>2</sub>/hexane 1:1 to 1:0, then acetone). Fractions containing the product were combined and concentrated. The resulting solid was washed with CHCl<sub>3</sub>, filtered and collected to yield **5** (202 mg, 26%) as a brown solid.

<sup>1</sup>H NMR (400 MHz, DMSO-*d*<sub>6</sub>): δ = 9.79 (br, 2H), 8.55 (d, *J* = 9.2 Hz, 2H), 8.32 (s, 2H), 8.25 – 8.09 (m, 8H), 8.01 (m, 4H). <sup>13</sup>C NMR (101 MHz, DMSO-*d*<sub>6</sub>): δ = 149.88, 131.32, 131.18, 128.89, 127.50, 126.23, 125.87, 125.07, 125.02, 124.40, 124.32, 124.11, 124.00, 123.75, 122.04, 119.37. IR (neat): ν = 2923, 2853, 1728, 1462, 1275, 1123, 841, 750. HR-MS (ESI<sup>-</sup>): *m/z*: 433.1226 [M-H]<sup>-</sup> (calcd for C<sub>32</sub>H<sub>17</sub>O<sub>2</sub>: 433.1229).

### Compound 7:

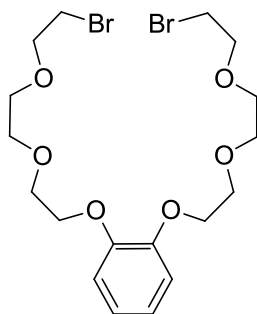

Under Ar, to a solution of **6** (455 mg, 0.666 mmol) in anhydrous acetone (5 mL) was added LiBr (1.13 g, 13.0 mmol). The suspension was refluxed overnight. The mixture was diluted with EtOAc (100 mL) and washed with brine (2 × 100 mL). The organic layer was dried over anhydrous Na<sub>2</sub>SO<sub>4</sub> and the solvent was removed under vacuum. The crude material was purified by column chromatography (SiO<sub>2</sub>, gradient from hexane/EtOAc 90:10 to 30:70) to afford **7** (307 mg, 92%) as a yellow oil.

<sup>1</sup>H NMR (500 MHz, CDCl<sub>3</sub>): δ = 6.89 (m, 4H), 4.14 (t, *J* = 6.2 Hz, 4H), 3.84 (t, *J* = 6.2 Hz, 4H), 3.78 (t, *J* = 6.3 Hz, 4H), 3.72 (m, 4H), 3.66 (m, 4H), 3.44 (t, *J* = 6.3 Hz, 4H). <sup>13</sup>C NMR (126 MHz, CDCl<sub>3</sub>): δ = 148.97, 121.65, 114.97, 71.18, 70.79, 70.57, 69.86, 68.89, 30.44. IR (neat): ν = 2871, 1592, 1502, 1254, 1114, 1051, 930, 747. HR-MS (ESI<sup>+</sup>): *m/z*: 521.0145 [M+Na]<sup>+</sup> (calcd for C<sub>18</sub>H<sub>28</sub>Br<sub>2</sub>O<sub>6</sub>Na: 521.0150).

### Compound 8:

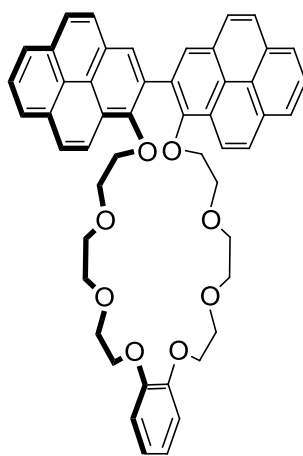

To a degassed solution of **5** (41 mg, 0.094 mmol) in anhydrous dioxane (150 mL) was added <sup>t</sup>BuOK (42 mg, 0.38 mmol). The solution was stirred for 20 min at room temperature and subsequently, were added **7** (47 mg, 0.094 mmol), KPF<sub>6</sub> (17 mg, 0.094 mmol) and a catalytic amount of <sup>n</sup>Bu<sub>4</sub>NI. The mixture was refluxed for 24 h. The solvent was removed under reduced pressure, the solid was dissolved in CH<sub>2</sub>Cl<sub>2</sub> (150 mL) and an excess of KPF<sub>6</sub> was added. The mixture was filtered and the solvent was evaporated under vacuum. The crude material was purified by column chromatography (SiO<sub>2</sub>, CH<sub>2</sub>Cl<sub>2</sub>/MeOH 96:4), then by preparative TLC (SiO<sub>2</sub>, CH<sub>2</sub>Cl<sub>2</sub>/MeOH 97:3) and finally by gel permeation chromatography (Bio-Beads<sup>®</sup> SX-1, CH<sub>2</sub>Cl<sub>2</sub>). The resulting solid was dissolved in CH<sub>2</sub>Cl<sub>2</sub> (30 mL) and washed with an aqueous solution of Na<sub>4</sub>EDTA (0.1 M, 5 × 50 mL) and H<sub>2</sub>O (3 × 50 mL). The organic layer was dried over anhydrous Na<sub>2</sub>SO<sub>4</sub> and the solvent was removed under vacuum to give **8** (25 mg, 34%) as a brown solid.

<sup>1</sup>H NMR (500 MHz, CDCl<sub>3</sub>): δ = 8.63 (d, *J* = 9.0 Hz, 2H), 8.40 (s, 2H), 8.18 (d, *J* = 7.6 Hz, 2H), 8.14 – 7.99 (m, 10H), 6.92 (m, 2H), 6.83 (m, 2H), 4.09 – 3.89 (m, 8H), 3.63 (m, 6H), 3.45 (m, 10H). <sup>13</sup>C NMR (126 MHz,

CDCl<sub>3</sub>):  $\delta$  = 151.49, 149.13, 131.48, 131.40, 130.23, 129.33, 128.27, 127.73, 127.70, 127.28, 126.76, 126.34, 125.73, 125.02, 124.99, 124.90, 122.31, 121.61, 114.64, 74.21, 70.90, 70.85, 70.39, 69.79, 69.20. IR (neat):  $\nu$  = 3040, 2924, 2869, 1593, 1502, 1452, 1347, 1255, 1209, 1120, 1047, 844, 764, 749. HR-MS (ESI<sup>+</sup>):  $m/z$ : 795.2936 [M+Na]<sup>+</sup> (calcd for C<sub>50</sub>H<sub>44</sub>O<sub>8</sub>Na: 795.2934); 811.2678 [M+K]<sup>+</sup> (calcd for C<sub>50</sub>H<sub>44</sub>O<sub>8</sub>K: 811.2673)

#### Compound S4:

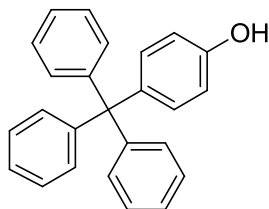

To a solution of **S3** (63.7 g, 0.245 mol) and phenol (350 g) at 160 °C, was added HCl<sub>(aq.)</sub> (37%, 12 mL). The mixture was further stirred for 6 h at 160 °C. Subsequently, toluene (500 mL) was added while the mixture was hot and the suspension was allowed to precipitate overnight at room temperature. The resulting solid was collected, washed with toluene (500 mL), cold Et<sub>2</sub>O (300 mL) and dried under vacuum to give **S4** (49.1 g, 60%) as a white solid.

<sup>1</sup>H NMR (400 MHz, DMSO-*d*<sub>6</sub>):  $\delta$  = 7.27 (t,  $J$  = 7.6 Hz, 6H), 7.21 – 7.10 (m, 9H), 6.90 (d,  $J$  = 8.8 Hz, 2H), 6.68 (d,  $J$  = 8.8 Hz, 2H). <sup>13</sup>C NMR (101 MHz, DMSO-*d*<sub>6</sub>):  $\delta$  = 155.26, 146.84, 136.57, 131.56, 130.46, 127.55, 125.80, 114.37, 63.74. IR (neat):  $\nu$  = 3549, 3027, 1611, 1592, 1507, 1262, 1177, 1161, 764, 750, 701. HR-MS (ESI<sup>-</sup>):  $m/z$ : 335.1435 [M-H]<sup>-</sup> (calcd for C<sub>25</sub>H<sub>19</sub>O: 335.1436).

#### Compound S5:

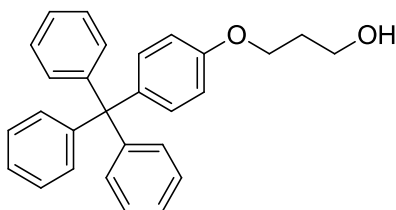

Under inert atmosphere, to a solution of **S4** (1.00 g, 2.97 mmol) in anhydrous acetone (100 mL) were added K<sub>2</sub>CO<sub>3</sub> (2.06 g, 14.9 mmol) and 3-bromo-1-propanol (340  $\mu$ L, 3.87 mmol). The suspension was refluxed for 24 h. The mixture was filtered and the solvent was removed under reduced pressure. The resulting solid was dissolved in a mixture of CH<sub>2</sub>Cl<sub>2</sub>/H<sub>2</sub>O (1:1, 100 mL). Layers were separated and the aqueous one was extracted with CH<sub>2</sub>Cl<sub>2</sub> (50 mL). The combined organic phases were dried over anhydrous Na<sub>2</sub>SO<sub>4</sub> and the solvent was removed under vacuum. The crude material was purified by column chromatography (SiO<sub>2</sub>, CH<sub>2</sub>Cl<sub>2</sub>) to afford **S5** (1.15 g, 98%) as a white solid.

<sup>1</sup>H NMR (500 MHz, CDCl<sub>3</sub>):  $\delta$  = 7.27 – 7.17 (m, 15H), 7.11 (d,  $J$  = 8.9 Hz, 2H), 6.79 (d,  $J$  = 8.9 Hz, 2H), 4.11 (t,  $J$  = 5.9 Hz, 2H), 3.85 (t,  $J$  = 5.9 Hz, 2H), 2.04 (p,  $J$  = 5.9 Hz, 2H). <sup>13</sup>C NMR (126 MHz, CDCl<sub>3</sub>):  $\delta$  = 156.80, 147.14, 139.36, 132.37, 131.25, 127.56, 125.99, 113.37, 65.84, 64.45, 60.81, 32.14. IR (neat):  $\nu$  = 3323 (br), 1605, 1507, 1264, 1248, 1183, 1058, 1034, 825, 748, 700. HR-MS (ESI<sup>+</sup>):  $m/z$ : 417.1830 [M+Na]<sup>+</sup> (calcd for C<sub>28</sub>H<sub>26</sub>O<sub>2</sub>Na: 417.1830).

### Compound S6:

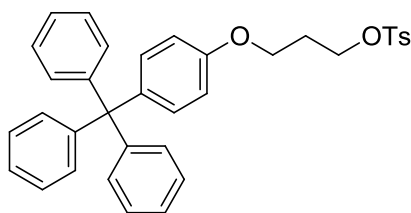

Under an Ar atmosphere, to a solution of **S5** (2.00 g, 5.07 mmol) in CH<sub>2</sub>Cl<sub>2</sub> (200 mL) were added Et<sub>3</sub>N (2.80 mL, 20.3 mmol), TsCl (1.93 g, 10.1 mmol) in three portions and a catalytic amount of DMAP. The solution was stirred overnight at room temperature. The solvent was removed under reduced pressure and the crude material was purified by column chromatography (SiO<sub>2</sub>, hexane/CH<sub>2</sub>Cl<sub>2</sub> 60:40 to 40:60) to afford **S6** (2.41 g, 87%) as a white solid.

<sup>1</sup>H NMR (500 MHz, CDCl<sub>3</sub>): δ = 7.75 (d, *J* = 8.3 Hz, 2H), 7.27 – 7.17 (m, 17H), 7.08 (d, *J* = 8.9 Hz, 2H), 6.64 (d, *J* = 8.9 Hz, 2H), 4.23 (t, *J* = 6.1 Hz, 2H), 3.94 (t, *J* = 5.9 Hz, 2H), 2.35 (s, 3H), 2.10 (p, *J* = 6.0 Hz, 2H). <sup>13</sup>C NMR (126 MHz, CDCl<sub>3</sub>): δ = 156.54, 147.12, 144.89, 139.44, 132.98, 132.28, 131.23, 129.98, 128.03, 127.59, 126.03, 113.34, 67.26, 64.45, 63.15, 29.06, 21.76. IR (neat): ν = 3056, 1598, 1508, 1362, 1251, 1187, 1176, 948, 750, 702. HR-MS (ESI<sup>+</sup>): *m/z*: 571.1923 [M+Na]<sup>+</sup> (calcd for C<sub>35</sub>H<sub>32</sub>SO<sub>2</sub>Na: 571.1919).

### Compound 12:

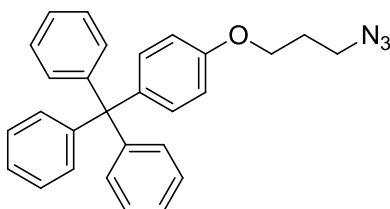

**Caution!** NaN<sub>3</sub> is very toxic if swallowed, in contact with skin (readily absorbed) or inhaled. Therefore this reagent should be handled with care and adequate safety measures should be taken during the synthesis and large scale reactions should be avoided. Moreover, it forms explosive metal azides if it reacts with lead or copper.

Under Ar, to a solution of **S6** (309 mg, 0.563 mmol) in anhydrous DMF (15 mL) was added NaN<sub>3</sub> (109 mg, 1.68 mmol). The suspension was stirred for 15 h at 70 °C. The mixture was diluted with CH<sub>2</sub>Cl<sub>2</sub> (30 mL) and washed with H<sub>2</sub>O (3 × 30 mL). Subsequently, the aqueous phase was extracted with CH<sub>2</sub>Cl<sub>2</sub> (2 × 70 mL). The combined organic layers were dried over anhydrous Na<sub>2</sub>SO<sub>4</sub> and the solvent was evaporated under reduced pressure. The crude material was purified by column chromatography (SiO<sub>2</sub>, hexane/CH<sub>2</sub>Cl<sub>2</sub> 60:40) to give **12** (172 mg, 73%) as a white solid.

<sup>1</sup>H NMR (400 MHz, CDCl<sub>3</sub>): δ = 7.27 – 7.15 (m, 15H), 7.10 (d, *J* = 8.9 Hz, 2H), 6.77 (d, *J* = 8.9 Hz, 2H), 4.02 (t, *J* = 5.9 Hz, 2H), 3.51 (t, *J* = 6.7 Hz, 2H), 2.03 (p, *J* = 6.3 Hz, 2H). <sup>13</sup>C NMR (101 MHz, CDCl<sub>3</sub>): δ = 156.74, 147.14, 139.41, 132.37, 131.25, 127.57, 126.00, 113.38, 64.48, 64.46, 48.42, 28.98. IR (neat): ν = 3056, 2096, 1606, 1508, 1248, 1183, 764, 749, 701. Spectral data agree with those previously reported values.<sup>S10</sup>

### Compound S7:

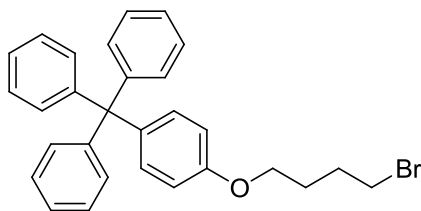

Under inert atmosphere, to a solution of **S4** (5.00 g, 14.9 mmol) in anhydrous  $\text{CH}_3\text{CN}$  (150 mL) were added  $\text{K}_2\text{CO}_3$  (10.3 g, 74.5 mmol) and 1,4-dibromobutane (8.85 mL, 74.1 mmol). The suspension was stirred overnight at 75 °C. The solvent was then removed under vacuum and the solid was dissolved in a mixture of  $\text{CH}_2\text{Cl}_2/\text{H}_2\text{O}$  (1:1, 400 mL). Layers were separated and the organic one was washed with  $\text{H}_2\text{O}$  ( $2 \times 200$  mL). The organic phase was dried over anhydrous  $\text{Na}_2\text{SO}_4$  and the solvent was evaporated under reduced pressure. The crude material was purified by column chromatography ( $\text{SiO}_2$ , hexane to hexane/ $\text{CH}_2\text{Cl}_2$  90:10) to afford **S7** (3.78 g, 54%) as a white solid.

$^1\text{H}$  NMR (400 MHz,  $\text{CDCl}_3$ ):  $\delta = 7.27 - 7.16$  (m, 15H), 7.10 (d,  $J = 8.9$  Hz, 2H), 6.76 (d,  $J = 8.9$  Hz, 2H), 3.97 (t,  $J = 6.0$  Hz, 2H), 3.48 (t,  $J = 6.6$  Hz, 2H), 2.06 (m, 2H), 1.93 (m, 2H).  $^{13}\text{C}$  NMR (101 MHz,  $\text{CDCl}_3$ ):  $\delta = 156.96$ , 147.18, 139.22, 132.36, 131.26, 127.56, 125.99, 113.35, 66.83, 64.47, 33.63, 29.68, 28.12. IR (neat):  $\nu = 3055$ , 1607, 1507, 1251, 1183, 1035, 827, 764, 750, 702. HR-MS ( $\text{EI}^+$ ):  $m/z$ : 470.1245 [ $\text{M}$ ] $^+$  (calcd for  $\text{C}_{29}\text{H}_{27}\text{OBr}$ : 470.1245).

### Compound S9:

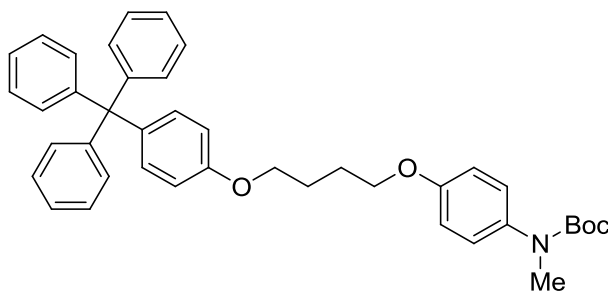

Under an Ar atmosphere, to a solution of **S7** (4.00 g, 8.48 mmol) in anhydrous DMF (15 mL) were added  $\text{Cs}_2\text{CO}_3$  (6.97 g, 21.4 mmol) and **S8** (1.60 g, 7.17 mmol). The suspension was stirred overnight at 70 °C. The mixture was diluted with EtOAc (100 mL) and washed with  $\text{H}_2\text{O}$  ( $3 \times 100$  mL) and brine ( $2 \times 100$  mL). The organic layer was dried over anhydrous  $\text{Na}_2\text{SO}_4$  and concentrated to dryness. The crude material was purified by column chromatography ( $\text{SiO}_2$ , hexane to hexane/EtOAc 60:40) to yield **S9** (2.58 g, 59%) as a white solid.

$^1\text{H}$  NMR (500 MHz,  $\text{CDCl}_3$ ):  $\delta = 7.27 - 7.16$  (m, 15H), 7.13 – 7.08 (m, 4H), 6.83 (d,  $J = 8.9$  Hz, 2H), 6.77 (d,  $J = 8.9$  Hz, 2H), 4.01 (m, 4H), 3.21 (s, 3H), 1.96 (m, 4H), 1.43 (s, 9H).  $^{13}\text{C}$  NMR (126 MHz,  $\text{CDCl}_3$ ):  $\delta = 157.06$ , 156.81, 155.28, 147.19, 139.07, 137.02, 132.34, 131.26, 127.55, 127.04, 125.98, 114.56, 113.35, 80.11, 67.83, 67.44, 64.45, 37.80, 28.52, 26.21. IR (neat):  $\nu = 2950$ , 1696, 1510, 1365, 1244, 1150, 830, 764, 749, 702. HR-MS ( $\text{ESI}^+$ ):  $m/z$ : 636.3093 [ $\text{M}+\text{Na}$ ] $^+$  (calcd for  $\text{C}_{41}\text{H}_{43}\text{NO}_4\text{Na}$ : 636.3090).



### Compounds (R)/(S)-9:

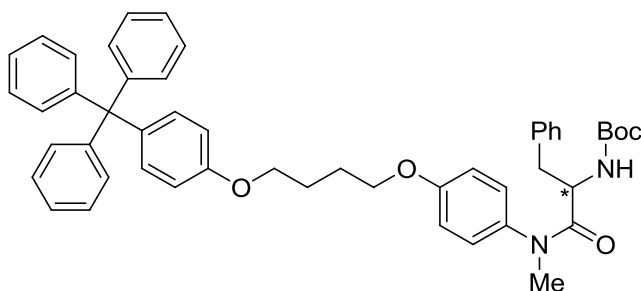

For the synthesis of (*R*)-**9**: To a solution of **S9** (515 mg, 0.839 mmol) in CH<sub>2</sub>Cl<sub>2</sub> (5 mL) was added CF<sub>3</sub>CO<sub>2</sub>H (1 mL). The solution was stirred for 4 h at room temperature. The solvent was evaporated under reduced pressure. Subsequently, the solid was redissolved in toluene (3 × 20 mL) and concentrated to dryness. The solid was then dissolved in anhydrous CH<sub>2</sub>Cl<sub>2</sub> (10 mL). Under Ar, to this solution were added Boc-D-Phe-OH (222 mg, 0.839 mmol), HOBt (113 mg, 0.839 mmol), EDCI (250 mg, 0.839 mmol) and DIPEA (145 μL, 0.839 mmol), while cooling in a water-ice bath. The mixture was stirred for 1 h at 0–4 °C and for 18 h at room temperature. The solution was concentrated to dryness. The crude was dissolved in EtOAc (100 mL) and washed with successively with an aqueous solution of citric acid (10%, 2 × 50 mL), a saturated solution of NaHCO<sub>3(aq)</sub> (2 × 100 mL), K<sub>2</sub>CO<sub>3(aq)</sub> (2 M, 2 × 100 mL) and brine (100 mL). The organic phase was dried over anhydrous Na<sub>2</sub>SO<sub>4</sub> and the solvent was removed under reduced pressure. The crude material was purified by column chromatography (SiO<sub>2</sub>, hexane/EtOAc 98:2 to 50:50) to give (*R*)-**9** (383 mg, 60%) as a white solid.

For the synthesis of (*S*)-**9**: This enantiomer was obtained following the same procedure starting from **S9** (500 mg, 0.815 mmol), employing Boc-L-Phe-OH and affording (*S*)-**9** (407 mg, 66%) as a white solid.

<sup>1</sup>H NMR (500 MHz, CDCl<sub>3</sub>): δ = 7.26 – 7.16 (m, 20H), 7.11 (d, *J* = 8.7 Hz, 2H), 6.95 (d, *J* = 5.5 Hz, 2H), 6.84 – 6.68 (m, 4H), 5.20 (d, *J* = 9.1 Hz, 1H), 4.52 (q, *J* = 7.9 Hz, 1H), 4.03 (m, 4H), 3.17 (s, 3H), 2.89 (dd, *J* = 13.3, 7.4 Hz, 1H), 2.71 (dd, *J* = 13.3, 7.4 Hz, 1H), 1.98 (m, 4H), 1.38 (s, 9H). <sup>13</sup>C NMR (126 MHz, CDCl<sub>3</sub>): δ = 172.19, 158.54, 157.02, 154.85, 147.15, 139.07, 136.78, 135.27, 132.32, 131.23, 129.55, 128.47, 128.41, 127.52, 126.74, 125.95, 115.39, 113.34, 79.47, 67.80, 67.36, 64.42, 52.20, 39.96, 37.83, 28.43, 26.15, 26.13. IR (neat): ν = 3307, 2922, 2852, 1711, 1652, 1509, 1245, 1172, 764, 750, 702. HR-MS (ESI<sup>+</sup>): *m/z*: 783.3771 [M+Na]<sup>+</sup> (calcd for C<sub>50</sub>H<sub>52</sub>N<sub>2</sub>O<sub>5</sub>Na: 783.3774); 761.3951 [M+H]<sup>+</sup> (calcd for C<sub>50</sub>H<sub>53</sub>N<sub>2</sub>O<sub>5</sub>: 761.3954). Spectral data are similar for both enantiomers except for the optical rotation: (*R*)-**9**: [α]<sub>D</sub><sup>20</sup> = –4.2° (*c* 1, CH<sub>2</sub>Cl<sub>2</sub>); (*S*)-**9**: [α]<sub>D</sub><sup>20</sup> = +4.0° (*c* 1, CH<sub>2</sub>Cl<sub>2</sub>).

### Compounds (R)/(S)-S10:

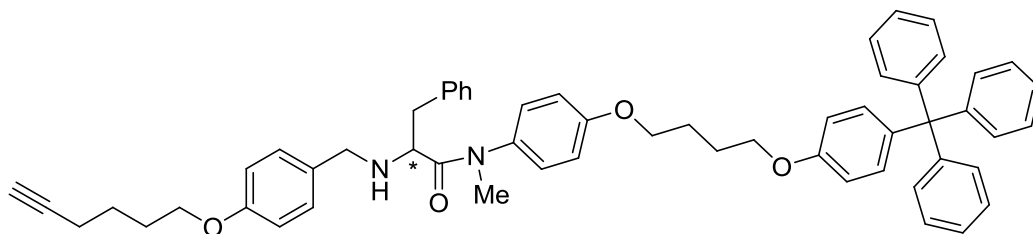

For the synthesis of (*R*)-**S10**: To a solution of (*R*)-**9** (226 mg, 0.297 mmol) in CH<sub>2</sub>Cl<sub>2</sub> (10 mL) was added CF<sub>3</sub>CO<sub>2</sub>H (4 mL). The mixture was stirred for 4 h at room temperature and the solvent was evaporated under reduced pressure. The solid was dissolved in anhydrous MeOH (15 mL). Under an Ar atmosphere, Et<sub>3</sub>N (1.6 mL) and **10** (60 mg, 0.297 mmol) were added. The mixture was stirred for 24 h at room temperature. Subsequently, NaBH<sub>4</sub> (50 mg, 1.33 mmol) and anhydrous THF (5 mL) were added. The solution was stirred for 18 h at room temperature. Then, H<sub>2</sub>O (15 mL) was added and the solution was stirred for another 30 min at room temperature. The product was extracted with CH<sub>2</sub>Cl<sub>2</sub> (3 × 30 mL). The combined organic phases were dried over anhydrous



### Compounds (*R*)/(*S*)-**14**-H<sup>+</sup>·PF<sub>6</sub><sup>-</sup>:

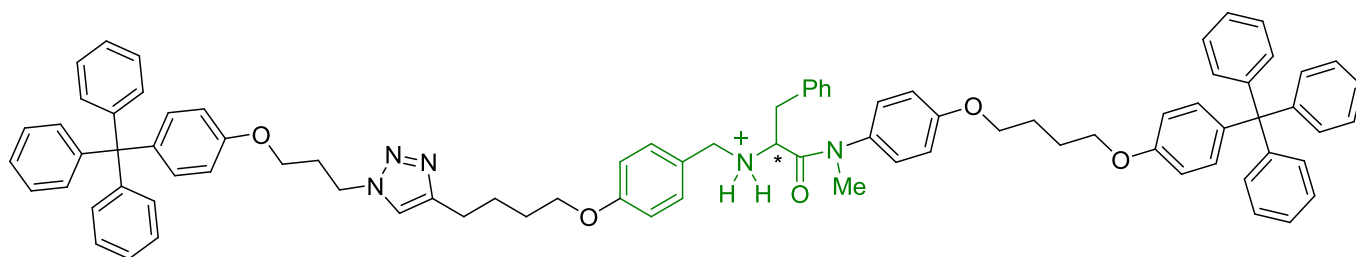

For the synthesis of (*R*)-**14**-H<sup>+</sup>·PF<sub>6</sub><sup>-</sup>: To a degassed solution of (*R*)-**11**-H<sup>+</sup>·PF<sub>6</sub><sup>-</sup> (14 mg, 0.014 mmol) in anhydrous CH<sub>2</sub>Cl<sub>2</sub> (3 mL) were added **12** (12 mg, 0.028 mmol), Cu(CH<sub>3</sub>CN)<sub>4</sub>PF<sub>6</sub> (3 mg, 0.007 mmol) and TBTA (4 mg, 0.007 mmol). The solution was stirred for 48 h at room temperature. The mixture was diluted with CH<sub>2</sub>Cl<sub>2</sub> (40 mL) and washed with an aqueous solution of Na<sub>4</sub>EDTA (0.1 M, 3 × 25 mL). The organic layer was dried over Na<sub>2</sub>SO<sub>4</sub> and the solvent was removed under reduced pressure. The crude material was purified by gel permeation chromatography (Bio-Beads® S-X1, CH<sub>2</sub>Cl<sub>2</sub>). The resulting solid was dissolved in CH<sub>2</sub>Cl<sub>2</sub> (10 mL) and HCl (1.0 M in Et<sub>2</sub>O, 1.0 mL) was added under inert atmosphere. The solution was stirred for 3 h at room temperature. The solvent was then evaporated under vacuum. Subsequently, the solid was dissolved in CH<sub>2</sub>Cl<sub>2</sub> (5 mL) and acetone (10 mL), H<sub>2</sub>O (10 mL) and an excess of KPF<sub>6</sub> were added. The mixture was stirred overnight at room temperature. The resulting mixture was diluted with H<sub>2</sub>O (20 mL) and extracted with CH<sub>2</sub>Cl<sub>2</sub> (2 × 25 mL). The combined organic layers were dried over anhydrous Na<sub>2</sub>SO<sub>4</sub> and concentrated to dryness to yield (*R*)-**14**-H<sup>+</sup>·PF<sub>6</sub><sup>-</sup> (19 mg, 95%) as a white solid.

For the synthesis of (*S*)-**14**-H<sup>+</sup>·PF<sub>6</sub><sup>-</sup>: This enantiomer was obtained following the same procedure starting from (*S*)-**11**-H<sup>+</sup>·PF<sub>6</sub><sup>-</sup> (62 mg, 0.062 mmol) and yielding (*S*)-**14**-H<sup>+</sup>·PF<sub>6</sub><sup>-</sup> (52 mg, 59%) as a white solid.

<sup>1</sup>H NMR (500 MHz, CDCl<sub>3</sub>): δ = 7.33 (s, 1H), 7.25 – 7.15 (m, 37H), 7.10 (m, 4H), 6.89 (m, 2H), 6.81 – 6.71 (m, 8H), 4.51 (t, *J* = 6.9 Hz, 2H), 4.19 – 4.12 (m, 2H), 4.06 – 3.85 (m, 9H), 3.22 (s, 3H), 3.09 (d, *J* = 7.2 Hz, 2H), 2.66 (br, 2H), 2.33 (p, *J* = 6.4 Hz, 2H), 1.98 (br, 4H), 1.74 (br, 4H). <sup>13</sup>C NMR (126 MHz, CDCl<sub>3</sub>): δ = 167.11, 160.43, 159.37, 157.04, 156.54, 147.78, 147.17, 147.08, 139.59, 139.12, 133.12, 132.94, 132.40, 132.34, 131.50, 131.27, 131.24, 131.20, 129.58, 129.37, 128.23, 128.18, 127.57, 127.55, 126.02, 125.98, 121.70, 121.06, 116.11, 115.43, 113.36, 68.14, 67.76, 67.40, 64.44, 64.19, 59.12, 51.41, 47.31, 38.74, 36.72, 30.12, 29.84, 28.64, 26.14, 26.10, 25.92, 25.18. IR (neat): ν = 2936, 1658, 1608, 1509, 1275, 1257, 1182, 844, 764, 750, 702. HR-MS (ESI<sup>+</sup>): *m/z*: 1266.6466 [M-PF<sub>6</sub><sup>-</sup>]<sup>+</sup> (calcd for C<sub>86</sub>H<sub>84</sub>N<sub>5</sub>O<sub>5</sub>: 1266.6472). Spectral data are similar for both enantiomers except for the optical rotation: (*R*)-**14**-H<sup>+</sup>·PF<sub>6</sub><sup>-</sup>: [α]<sub>D</sub><sup>20</sup> = -22.3° (*c* 0.33, CHCl<sub>3</sub>); (*S*)-**14**-H<sup>+</sup>·PF<sub>6</sub><sup>-</sup>: [α]<sub>D</sub><sup>20</sup> = +22.1° (*c* 0.33, CHCl<sub>3</sub>).

### Compounds (*R*)/(*S*)-**2**-H<sup>+</sup>·2PF<sub>6</sub><sup>-</sup>:

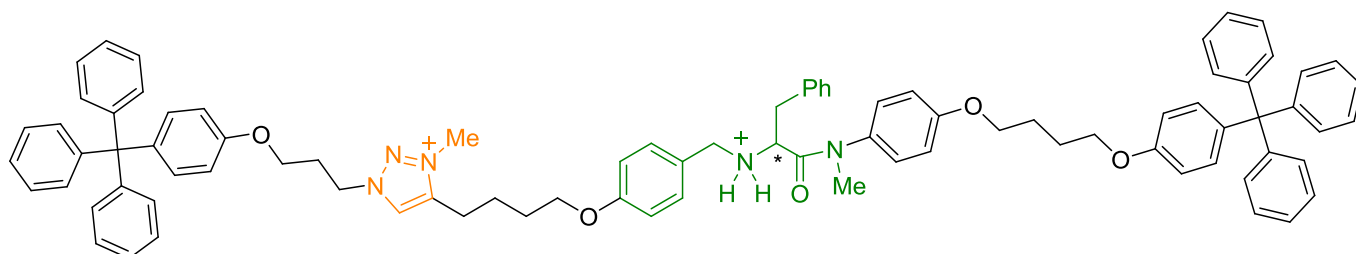

Compounds (*R*)- and (*S*)-**2**-H<sup>+</sup>·2PF<sub>6</sub><sup>-</sup> were prepared adapting the method reported by Zhu:<sup>S11</sup> For the synthesis of (*R*)-**2**-H<sup>+</sup>·2PF<sub>6</sub><sup>-</sup>: Under Ar, a solution of (*R*)-**14**-H<sup>+</sup>·PF<sub>6</sub><sup>-</sup> (17 mg, 12 μmol) in iodomethane (4 mL) was stirred for 4 days at room temperature. The solvent was removed under reduced pressure. Then, the solid was dissolved in

CH<sub>2</sub>Cl<sub>2</sub> (5 mL) and acetone (10 mL), H<sub>2</sub>O (10 mL) and an excess of KPF<sub>6</sub> were added. The mixture was stirred for 18 h at room temperature. The resulting mixture was diluted with H<sub>2</sub>O (25 mL) and extracted with CH<sub>2</sub>Cl<sub>2</sub> (3 × 30 mL). The combined extracts were dried over anhydrous Na<sub>2</sub>SO<sub>4</sub> and were concentrated to dryness. The crude material was purified by preparative TLC (SiO<sub>2</sub>, CH<sub>2</sub>Cl<sub>2</sub>/MeOH 98:2). The resulting solid was dissolved in CH<sub>2</sub>Cl<sub>2</sub> (10 mL) and HCl (1.0 M in Et<sub>2</sub>O, 1.0 mL) was added under inert atmosphere. The solution was stirred for 5 h at room temperature. The solvent was then evaporated under vacuum. Subsequently, the solid was dissolved in CH<sub>2</sub>Cl<sub>2</sub> (2.5 mL) and acetone (5 mL), H<sub>2</sub>O (5 mL) and an excess of KPF<sub>6</sub> were added. The mixture was stirred overnight at room temperature. The mixture was diluted with H<sub>2</sub>O (10 mL) and extracted with CH<sub>2</sub>Cl<sub>2</sub> (2 × 20 mL). The combined organic layers were dried over anhydrous Na<sub>2</sub>SO<sub>4</sub> and the solvent was evaporated under vacuum to yield (*R*)-**2-H**<sup>+</sup>·2PF<sub>6</sub><sup>-</sup> (11 mg, 58%) as a white solid.

For the synthesis of (*S*)-**2-H**<sup>+</sup>·2PF<sub>6</sub><sup>-</sup>: This enantiomer was synthesized following the same procedure starting from (*S*)-**14-H**<sup>+</sup>·PF<sub>6</sub><sup>-</sup> (21 mg, 15 μmol) and affording (*S*)-**2-H**<sup>+</sup>·2PF<sub>6</sub><sup>-</sup> (23 mg, 98%) as a white solid.

<sup>1</sup>H NMR (500 MHz, CDCl<sub>3</sub>): δ = 8.12 (s, 1H), 7.25 – 7.13 (m, 37H), 7.09 (m, 4H), 6.94 (br, 2H), 6.79 – 6.66 (m, 8H), 4.67 (t, *J* = 7.0 Hz, 2H), 4.08 – 3.83 (m, 14H), 3.20 – 3.13 (m, 5H), 2.76 (t, *J* = 7.7 Hz, 2H), 2.40 (m, 2H), 1.96 (br, 4H), 1.81 (m, 4H). <sup>13</sup>C NMR (126 MHz, CDCl<sub>3</sub>): δ = 166.82, 160.24, 159.35, 157.06, 156.30, 147.18, 147.08, 144.83, 139.69, 139.09, 133.11, 132.86, 132.38, 132.33, 131.59, 131.24, 131.17, 129.63, 129.41, 128.19, 128.09, 127.60, 127.56, 126.01, 125.98, 116.10, 115.58, 113.38, 113.36, 68.11, 67.46, 67.25, 64.46, 63.87, 59.58, 51.37, 47.74, 38.75, 37.32, 32.07, 29.60, 29.51, 29.42, 29.09, 28.12, 26.15, 26.09. IR (neat): ν = 2925, 1654, 1608, 1509, 1275, 1259, 1182, 837, 764, 750, 702, 558. HR-MS (ESI<sup>+</sup>): *m/z*: 1280.6637 [M-H<sup>+</sup>-2PF<sub>6</sub><sup>-</sup>]<sup>+</sup> (calcd for C<sub>87</sub>H<sub>86</sub>N<sub>5</sub>O<sub>5</sub>: 1280.6629); 1426.6366 [M-PF<sub>6</sub><sup>-</sup>]<sup>+</sup> (calcd for C<sub>87</sub>H<sub>87</sub>N<sub>5</sub>O<sub>5</sub>PF<sub>6</sub>: 1426.6349). Spectral data are similar for both enantiomers except for the optical rotation: (*R*)-**2-H**<sup>+</sup>·2PF<sub>6</sub><sup>-</sup>: [α]<sub>D</sub><sup>20</sup> = -5.5° (*c* 0.3, CHCl<sub>3</sub>); (*S*)-**2-H**<sup>+</sup>·2PF<sub>6</sub><sup>-</sup>: [α]<sub>D</sub><sup>20</sup> = +3.9° (*c* 0.3, CHCl<sub>3</sub>).

### Compounds (*R*)/(*S*)-**13-H**<sup>+</sup>·PF<sub>6</sub><sup>-</sup>:

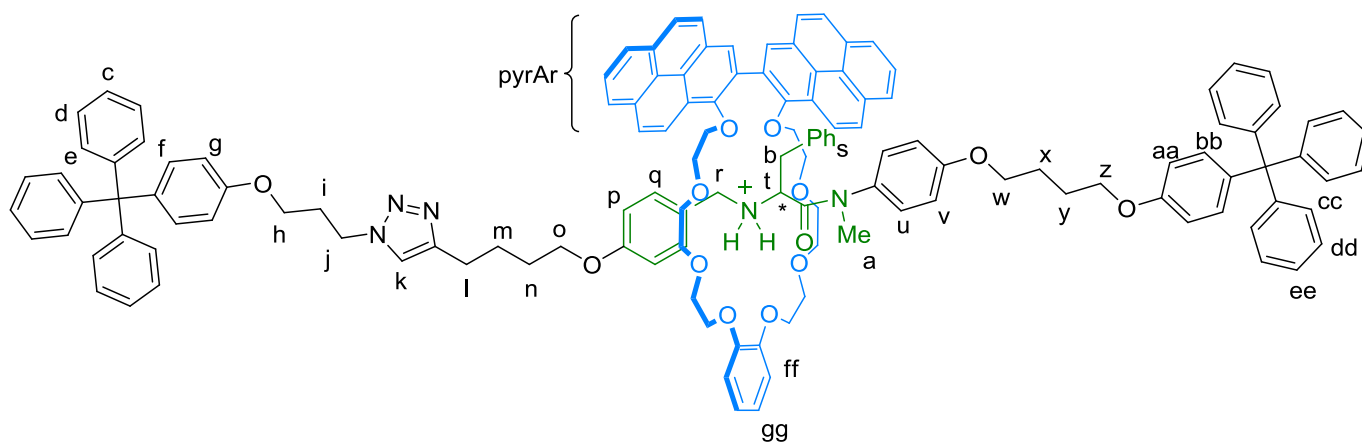

For the synthesis of (*R*)-**13-H**<sup>+</sup>·PF<sub>6</sub><sup>-</sup>: A solution of (*R*)-**11-H**<sup>+</sup>·PF<sub>6</sub><sup>-</sup> (17 mg, 0.017 mmol) and **8** (26 mg, 0.034 mmol) in CH<sub>2</sub>Cl<sub>2</sub> (8 mL) was stirred for 10 min at room temperature. The solvent was removed under reduced pressure and the solid was redissolved in CH<sub>2</sub>Cl<sub>2</sub> (1.5 mL). Under Ar, to this solution were added **12** (14 mg, 0.034 mmol), Cu(CH<sub>3</sub>CN)<sub>4</sub>PF<sub>6</sub> (3 mg, 0.008 mmol) and TBTA (5 mg, 0.008 mmol). The mixture was stirred for 3 days at room temperature. The resulting solution was diluted with CH<sub>2</sub>Cl<sub>2</sub> (25 mL) and washed with an aqueous solution of Na<sub>4</sub>EDTA (0.1 M, 2 × 25 mL). The organic layer was dried over Na<sub>2</sub>SO<sub>4</sub> and the solvent was evaporated under vacuum. The crude material was purified by gel permeation chromatography (Bio-Beads® S-X1, CH<sub>2</sub>Cl<sub>2</sub>) to afford (*R*)-**13-H**<sup>+</sup>·PF<sub>6</sub><sup>-</sup> (13 mg, 35%) as a brown solid.

For the synthesis of (*S*)-**13-H**<sup>+</sup>·PF<sub>6</sub><sup>-</sup>: This enantiomer was synthesized following the same procedure starting from (*S*)-**11-H**<sup>+</sup>·PF<sub>6</sub><sup>-</sup> (17 mg, 0.017 mmol) and affording (*S*)-**13-H**<sup>+</sup>·PF<sub>6</sub><sup>-</sup> (7 mg, 19%) as a brown solid.

<sup>1</sup>H NMR (500 MHz, CDCl<sub>3</sub>) δ = 8.57 – 8.45 (m, 2H, H<sub>pyrAr</sub>), 8.38 – 7.86 (m, 14H, H<sub>pyrAr</sub>), 7.48 (m, 1H, H<sub>k</sub>), 7.28 – 7.15 (m, 37H, H<sub>c+d+e+q+s+u+cc+dd+ee</sub>), 7.09 (m, 4H, H<sub>f+bb</sub>), 6.94 – 6.57 (m, 12H, H<sub>g+aa+ff+gg+p/v/s</sub>), 5.97 (d, *J* = 7.1 Hz, 1H, H<sub>p/v/s</sub>), 5.63 (d, *J* = 7.9 Hz, 1H, H<sub>p/v/s</sub>), 4.58 (br, 2H, H<sub>j</sub>), 4.36 – 3.08 (m, 35H, H<sub>macCH2+h+o+r+t+w+z</sub>), 2.75 (br, 4H, H<sub>l+b</sub>), 2.41 (m, 2H, H<sub>i</sub>), 2.32 (s, 3H, H<sub>a</sub>), 2.05 – 1.93 (m, 4H, H<sub>x+y</sub>), 1.71 – 1.48 (m, 4H, H<sub>m+n</sub>). <sup>13</sup>C NMR (126 MHz, CDCl<sub>3</sub>) δ = 165.98, 159.65, 158.67, 157.01, 156.63, 152.46, 150.52, 147.89, 147.13, 146.94, 139.44, 139.22, 132.37, 131.76, 131.22, 130.00, 129.60, 128.92, 128.66, 128.13, 127.86, 127.56, 127.19, 127.05, 126.91, 126.78, 126.60, 125.99, 125.76, 125.61, 125.44, 125.29, 125.17, 124.88, 124.71, 124.35, 122.46, 122.33, 122.20, 121.60, 114.08, 113.89, 113.44, 113.34, 76.00, 74.54, 73.28, 72.60, 71.63, 70.72, 70.00, 67.54, 67.42, 66.80, 64.43, 58.68, 50.12, 38.44, 37.95, 37.80, 37.44, 32.07, 30.30, 29.84, 28.64, 26.28, 25.37. IR (neat): ν = 2924, 1599, 1505, 1451, 1275, 1258, 1118, 1046, 843, 764, 750, 702. HR-MS (ESI<sup>+</sup>): *m/z*: 2038.9519 [M-PF<sub>6</sub>]<sup>+</sup> (calcd for C<sub>136</sub>H<sub>128</sub>N<sub>5</sub>O<sub>13</sub>: 2038.9509). Spectral data are similar for both enantiomers except for the optical rotation: (*R*)-**13-H**<sup>+</sup>·PF<sub>6</sub><sup>-</sup>: [α]<sub>D</sub><sup>20</sup> = -2.9° (*c* 0.2, CH<sub>2</sub>Cl<sub>2</sub>); (*S*)-**13-H**<sup>+</sup>·PF<sub>6</sub><sup>-</sup>: [α]<sub>D</sub><sup>20</sup> = +4.7° (*c* 0.2, CH<sub>2</sub>Cl<sub>2</sub>).

### Compounds (*R*)/(*S*)-**1-H**<sup>+</sup>·2PF<sub>6</sub><sup>-</sup>:

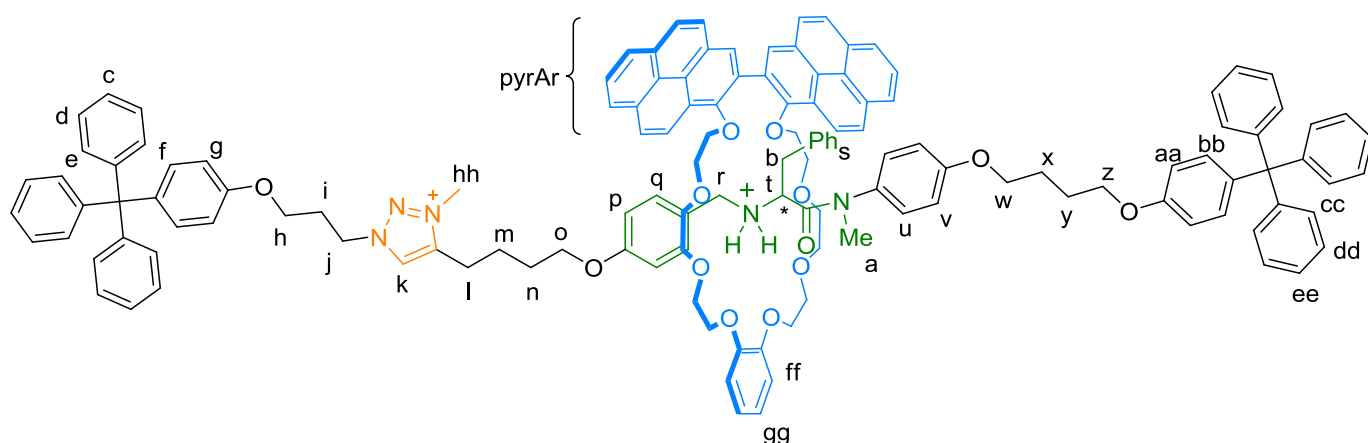

For the synthesis of (*R*)-**1-H**<sup>+</sup>·2PF<sub>6</sub><sup>-</sup>: Under inert atmosphere, a solution of (*R*)-**13-H**<sup>+</sup>·PF<sub>6</sub><sup>-</sup> (4 mg, 1.9 μmol) in iodomethane (4 mL) was stirred for 4 days at room temperature protected from light. The solvent was evaporated under vacuum. Subsequently, the solid was dissolved in CH<sub>2</sub>Cl<sub>2</sub> (2 mL) and acetone (5 mL), H<sub>2</sub>O (5 mL) and an excess of KPF<sub>6</sub> were added. The mixture was stirred for 5 h at room temperature protected from light. The resulting mixture was diluted with H<sub>2</sub>O (10 mL) and extracted with CH<sub>2</sub>Cl<sub>2</sub> (3 × 25 mL). The combined organic layers were dried over anhydrous Na<sub>2</sub>SO<sub>4</sub> and the solvent was removed under reduced pressure. The crude material was purified by preparative TLC (SiO<sub>2</sub>, CH<sub>2</sub>Cl<sub>2</sub>/MeOH 96:4) to yield (*R*)-**1-H**<sup>+</sup>·2PF<sub>6</sub><sup>-</sup> (3 mg, 68%) as a brown solid.

For the synthesis of (*S*)-**1-H**<sup>+</sup>·2PF<sub>6</sub><sup>-</sup>: This enantiomer was synthesized following the same procedure starting from (*S*)-**13-H**<sup>+</sup>·PF<sub>6</sub><sup>-</sup> (5 mg, 2.3 μmol) and affording (*S*)-**1-H**<sup>+</sup>·2PF<sub>6</sub><sup>-</sup> (3 mg, 55%) as a brown solid.

<sup>1</sup>H NMR (400 MHz, CDCl<sub>3</sub>) δ = 8.64 – 7.96 (m, 17H, H<sub>pyrAr+k</sub>), 7.34 – 7.04 (m, 41H, H<sub>c+d+e+f+g+h+i+j+l+m+n+o+p+r+s+t+u+bb+cc+dd+ee</sub>), 6.95 – 6.69 (m, 12H, H<sub>g+aa+ff+gg+p/v/s</sub>), 5.94 (br, 2H, H<sub>p/v/s</sub>), 4.33 – 3.15 (m, 44H, H<sub>macCH2+h+j+l+o+r+t+b+w+z+hh</sub>), 2.36 (m, 2H, H<sub>i</sub>), 2.31 (s, 3H, H<sub>a</sub>), 2.06 – 1.95 (m, 4H, H<sub>x+y</sub>), 1.66 (br, 4H, H<sub>m+n</sub>). <sup>13</sup>C NMR (126 MHz, CDCl<sub>3</sub>) δ = 147.17, 147.12, 132.52, 132.41, 132.38, 132.21, 131.49, 131.44, 131.24, 131.05, 130.21, 129.61, 128.63, 127.81, 127.59, 127.40, 127.32, 127.22, 127.09, 126.05, 125.98, 125.78, 125.08, 125.03, 124.98, 124.94, 122.35, 113.72, 113.67, 113.34, 113.23, 74.21, 72.66, 70.87, 70.72, 70.43, 69.85, 64.46, 64.28, 61.40, 40.32, 37.96, 32.08, 30.29, 29.85, 29.51, 28.63, 26.30, 22.86. IR (neat): ν = 2922, 2853, 1660, 1506, 1456, 1254, 1109, 841, 753, 702, 558. HR-MS (ESI<sup>+</sup>): *m/z*: 2052.9675 [M-H<sup>+</sup>-2PF<sub>6</sub>]<sup>+</sup> (calcd for C<sub>137</sub>H<sub>130</sub>N<sub>5</sub>O<sub>13</sub>: 2052.9665); 2198.9368 [M-PF<sub>6</sub>]<sup>+</sup> (calcd for

$C_{137}H_{131}N_5O_{13}PF_6$ : 2198.9385). Spectral data are similar for both enantiomers except for the optical rotation: (*R*)-**1**·**H**<sup>+</sup>·2**PF**<sub>6</sub><sup>-</sup>:  $[\alpha]_D^{20} = +14.1^\circ$  (*c* 0.1, CHCl<sub>3</sub>); (*S*)-**1**·**H**<sup>+</sup>·2**PF**<sub>6</sub><sup>-</sup>:  $[\alpha]_D^{20} = -14.2^\circ$  (*c* 0.1, CHCl<sub>3</sub>).

#### **Compound 1·PF<sub>6</sub><sup>-</sup>**

To obtain **1**·PF<sub>6</sub><sup>-</sup> for the NMR experiments: An excess of K<sub>2</sub>CO<sub>3</sub> was added to a degassed solution of **1**·**H**<sup>+</sup>·2**PF**<sub>6</sub><sup>-</sup> (1.2 mg, 0.51 μmol) in CDCl<sub>3</sub> (400 μL). The suspension was shaken for 1 min and subsequently filtered through a 0.2 μm filter to remove the excess of base. The resulting solution was analyzed by NMR.

## 2. Additional NMR Supporting Figures

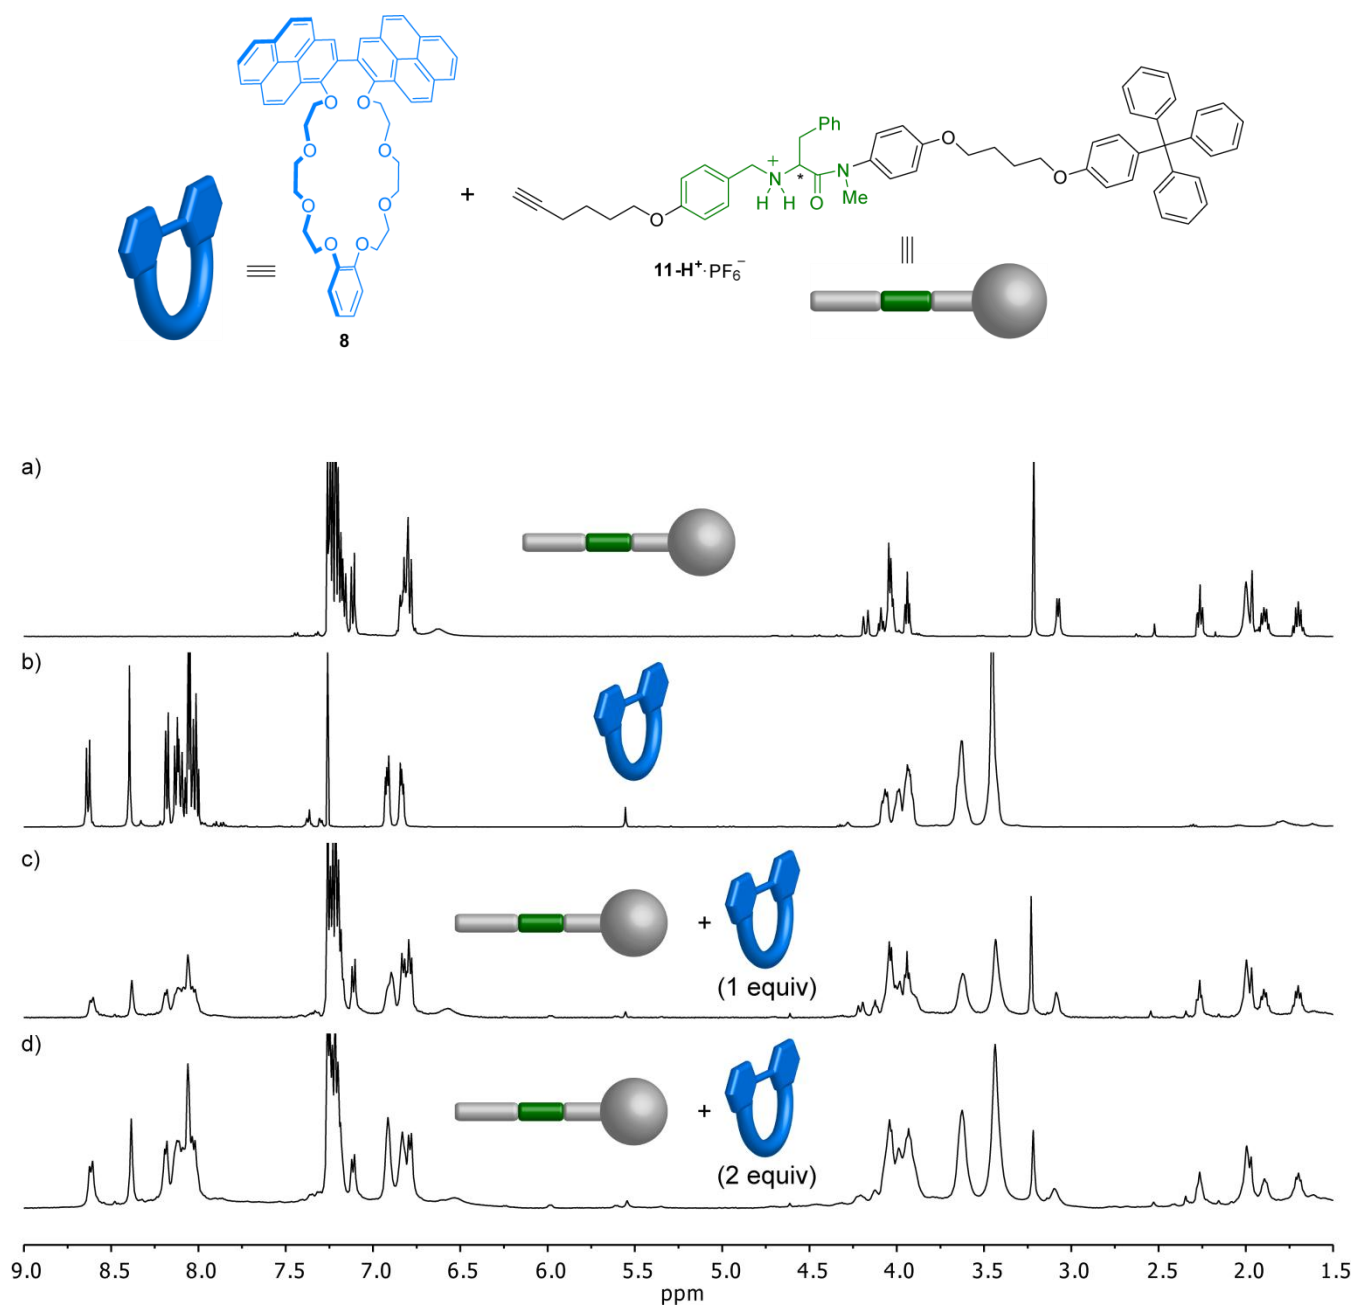

**Figure S1:** Study of the pseudorotaxane formation monitored by  $^1\text{H}$  NMR (500 MHz,  $\text{CDCl}_3$ ) spectroscopy: (a)  $11\text{-H}^+\cdot\text{PF}_6^-$ ; (b) macrocycle **8**; (c)  $11\text{-H}^+\cdot\text{PF}_6^-$  (8.0 mM) after addition of **8** (1 equiv); (d)  $11\text{-H}^+\cdot\text{PF}_6^-$  (8.0 mM) after addition of **8** (2 equiv).

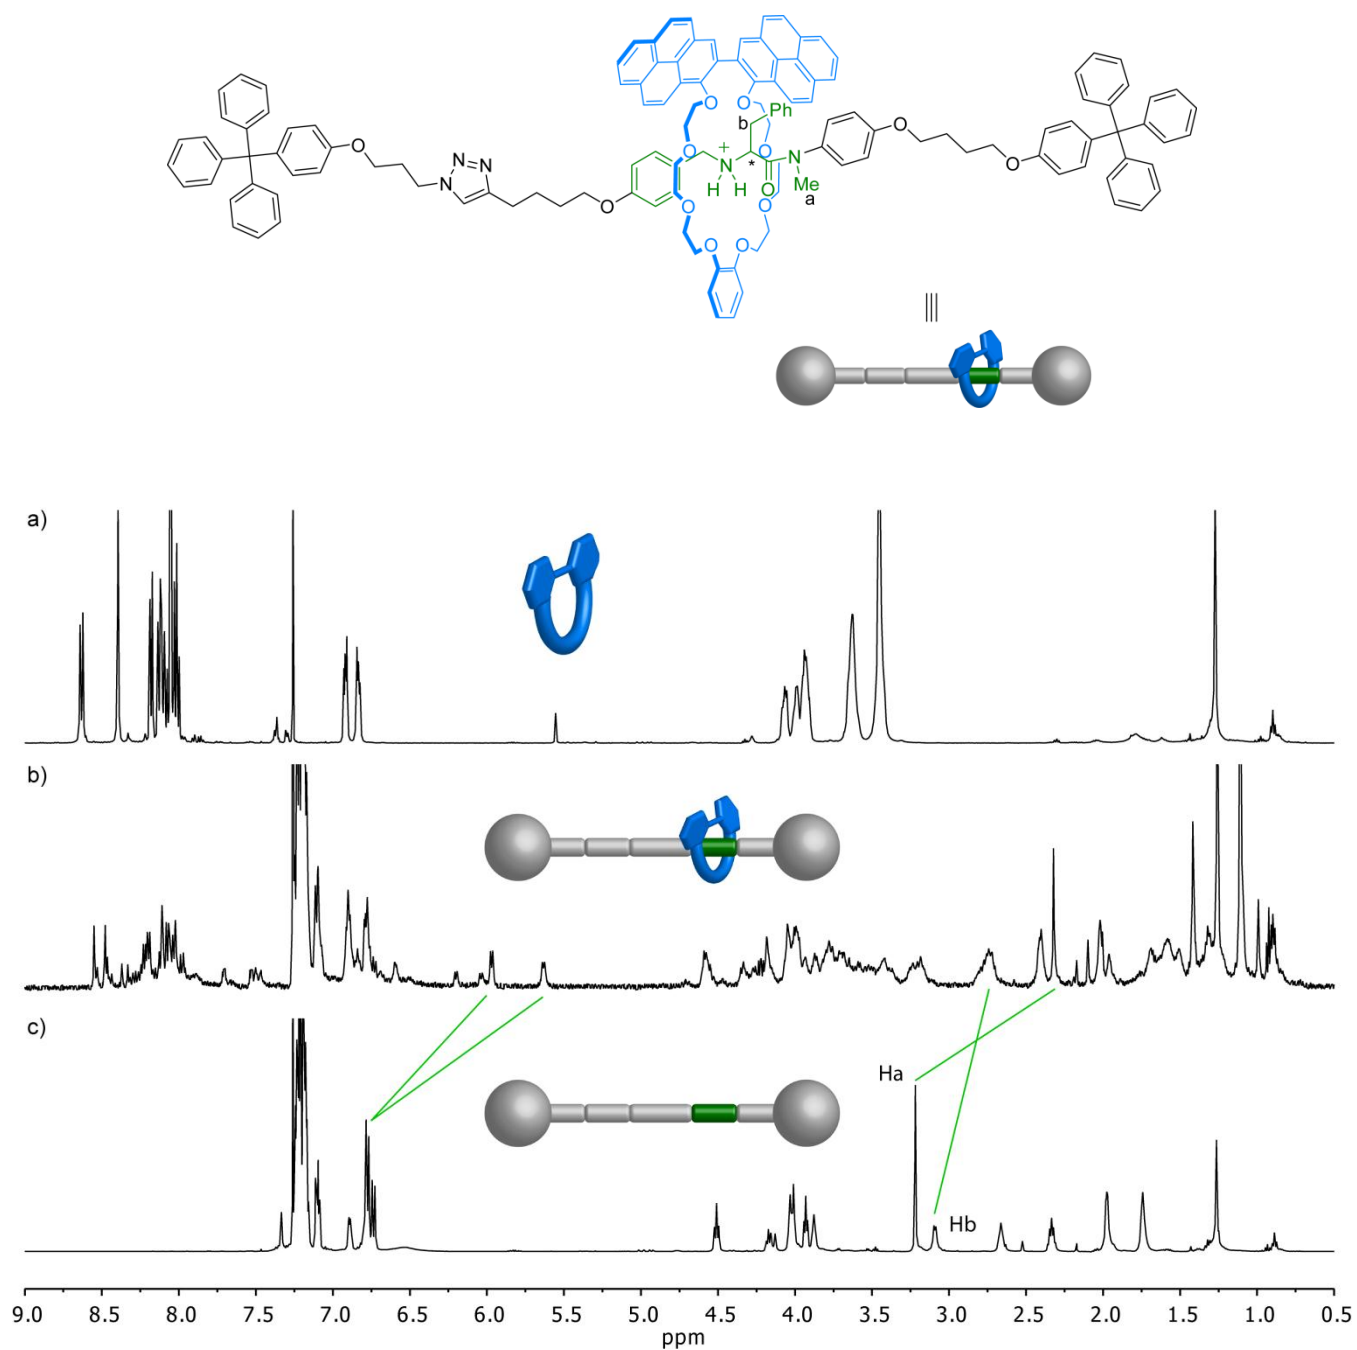

**Figure S2:**  $^1\text{H}$  NMR (500 MHz,  $\text{CDCl}_3$ ) spectra of: (a) macrocycle **8**; (b) rotaxane **13**· $\text{H}^+$ · $\text{PF}_6^-$ ; (c) thread **14**· $\text{H}^+$ · $\text{PF}_6^-$ .



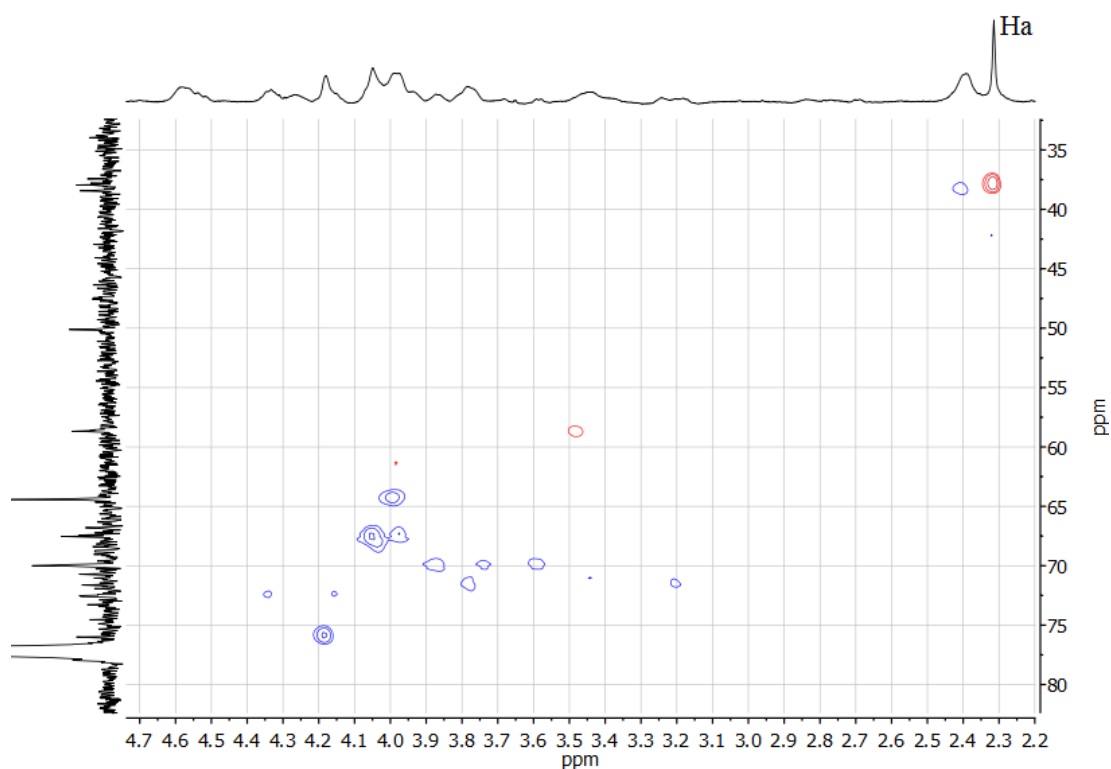

**Figure S3:** Partial HSQC NMR (500 MHz and 126 MHz,  $\text{CDCl}_3$ ) spectrum of rotaxane  $\mathbf{13-H}^+\cdot\text{PF}_6^-$  showing a signal at 2.3 ppm in the CH/CH<sub>3</sub> phase, supporting its assignment as the *N*-methyl amide group Ha.

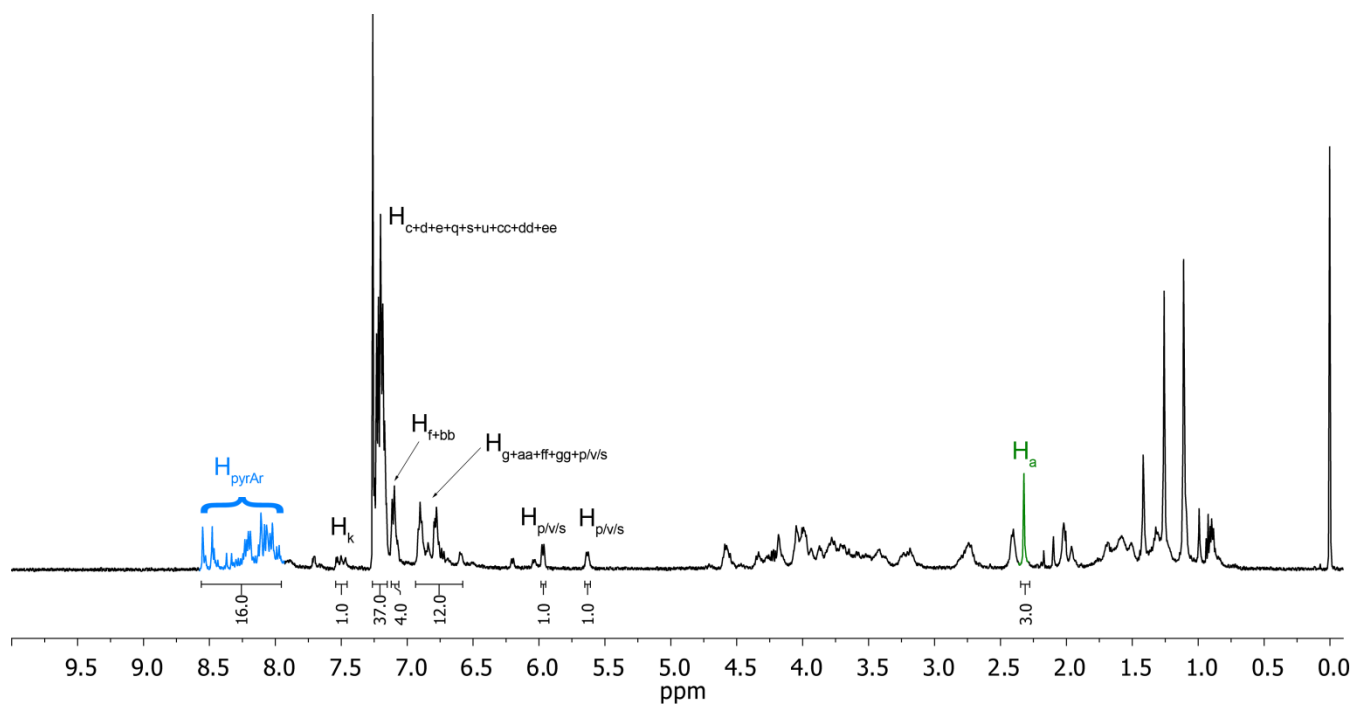

**Figure S4:**  $^1\text{H}$  NMR (500 MHz,  $\text{CDCl}_3$ ) spectrum of rotaxane  $\mathbf{13-H}^+\cdot\text{PF}_6^-$  showing the correct integration of the signal of Ha in comparison with those of the aromatic H atoms of the molecule.

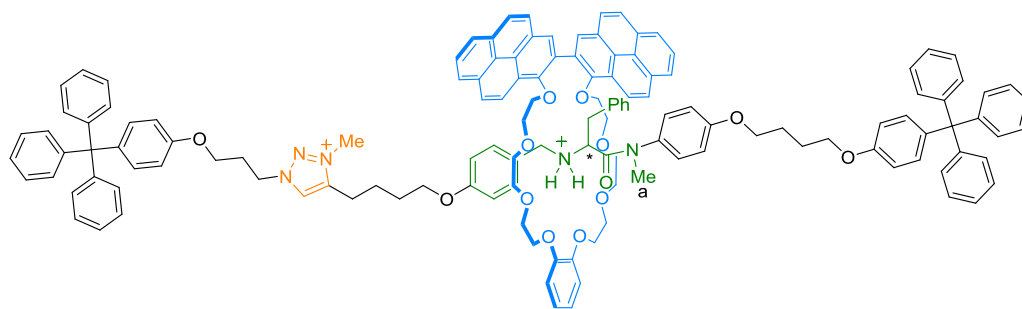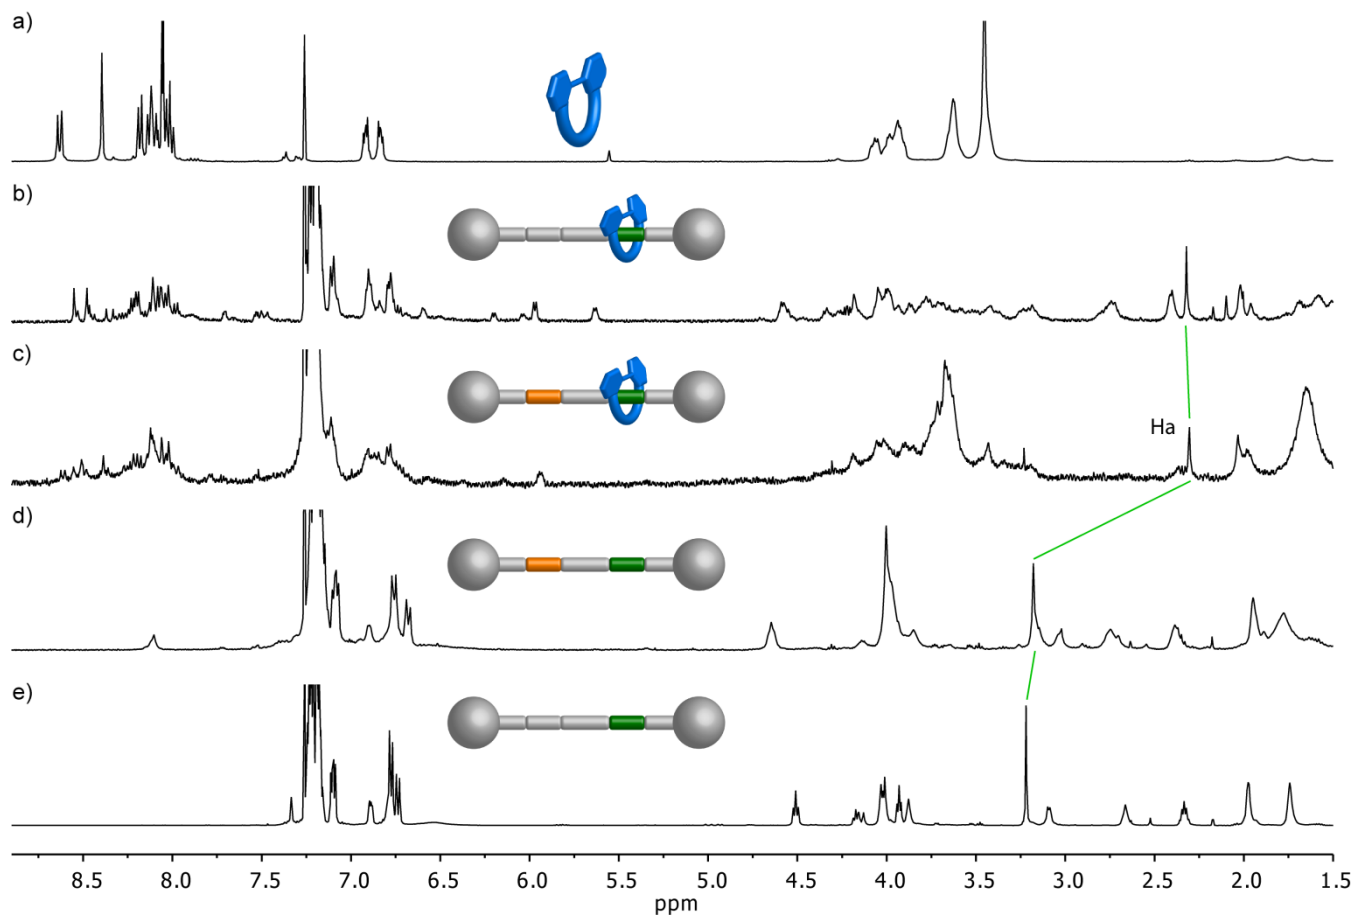

**Figure S5:**  $^1\text{H}$  NMR (400 MHz,  $\text{CDCl}_3$ ) spectra of: (a) macrocycle **8**; (b) rotaxane **13**- $\text{H}^+\cdot\text{PF}_6^-$ ; (c) rotaxane **1**- $\text{H}^+\cdot 2\text{PF}_6^-$ ; (d) thread **2**- $\text{H}^+\cdot 2\text{PF}_6^-$ ; (e) thread **14**- $\text{H}^+\cdot\text{PF}_6^-$ .

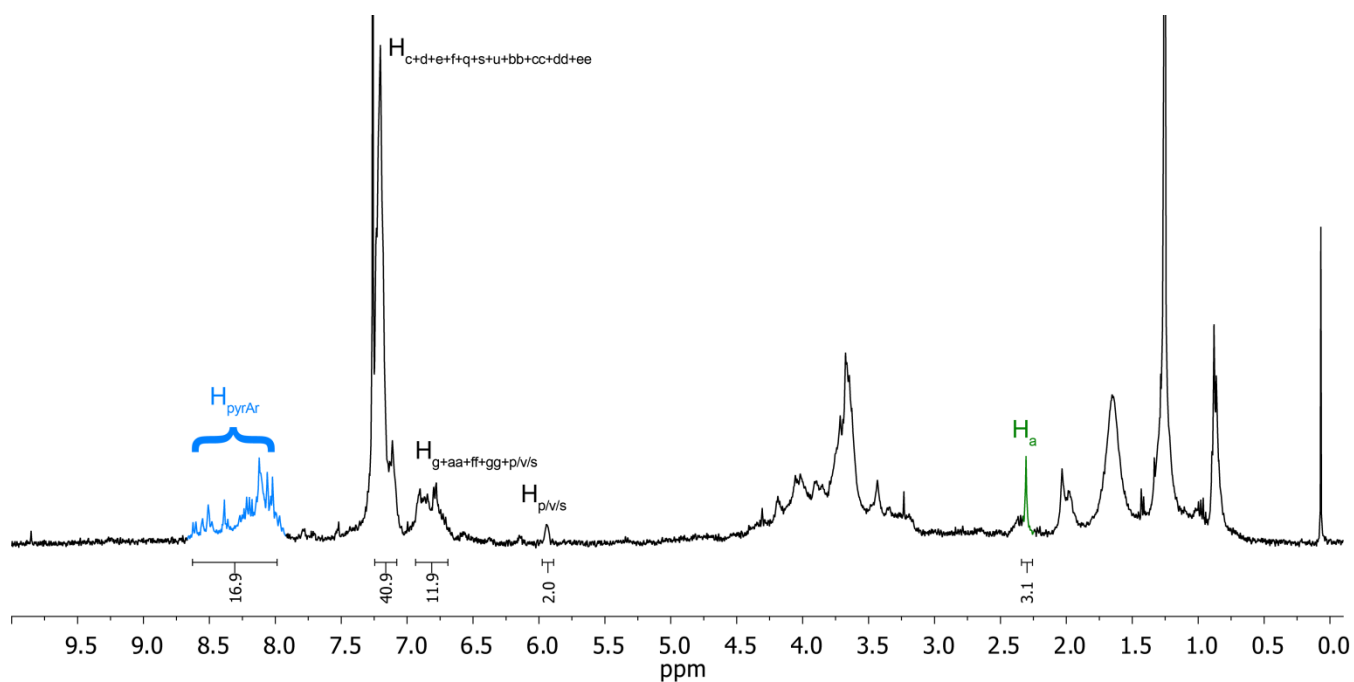

**Figure S6:**  $^1\text{H}$  NMR (500 MHz,  $\text{CDCl}_3$ ) spectrum of rotaxane  $\mathbf{1}\text{-H}^+\cdot 2\text{PF}_6^-$  showing the correct integration of the signal of  $\text{H}_a$  in comparison with those of the aromatic H atoms of the molecule.

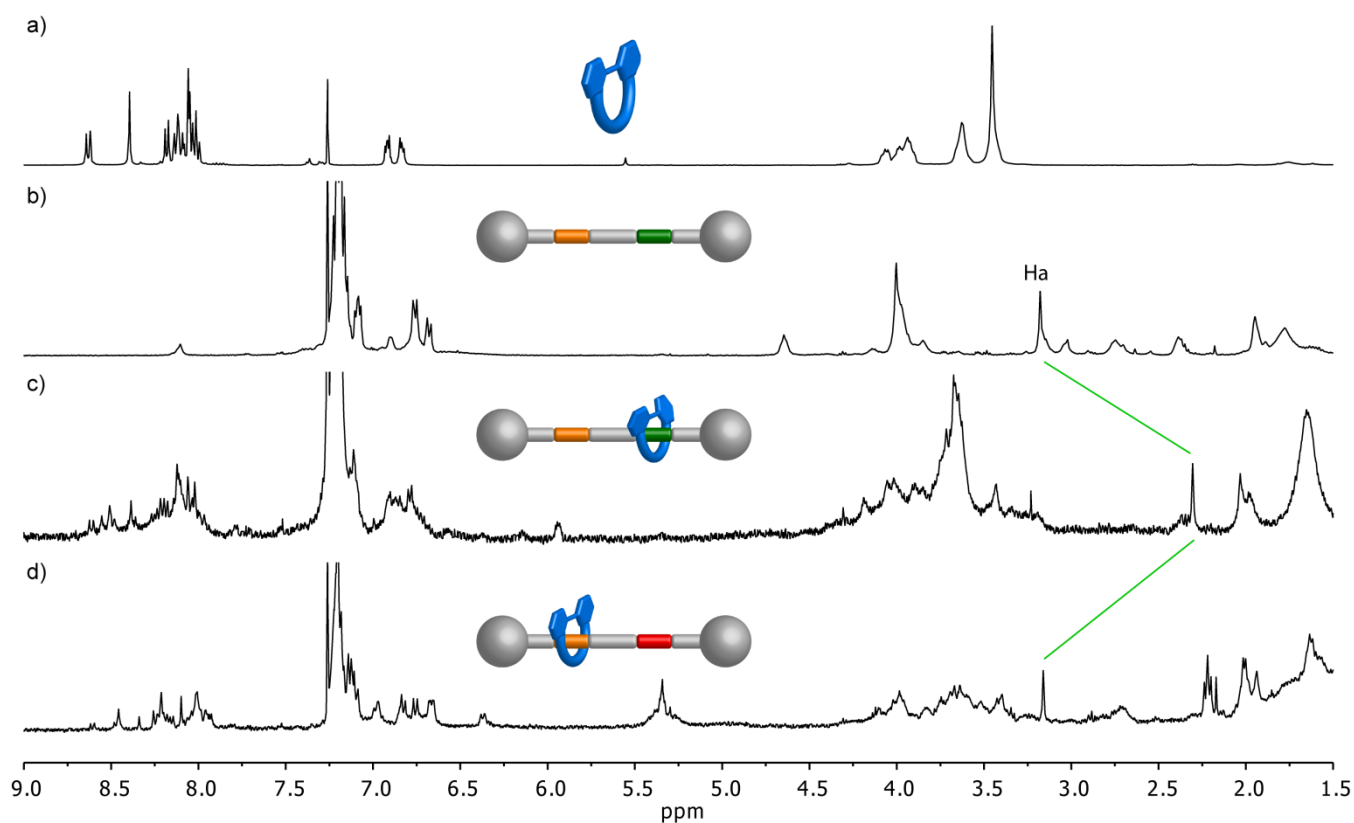

**Figure S7:**  $^1\text{H}$  NMR (400 MHz,  $\text{CDCl}_3$ ) spectra of: (a) macrocycle  $\mathbf{8}$ ; (b) thread  $\mathbf{2}\text{-H}^+\cdot 2\text{PF}_6^-$ ; (c) rotaxane  $\mathbf{1}\text{-H}^+\cdot 2\text{PF}_6^-$ ; (d) rotaxane  $\mathbf{1}\cdot \text{PF}_6^-$ .

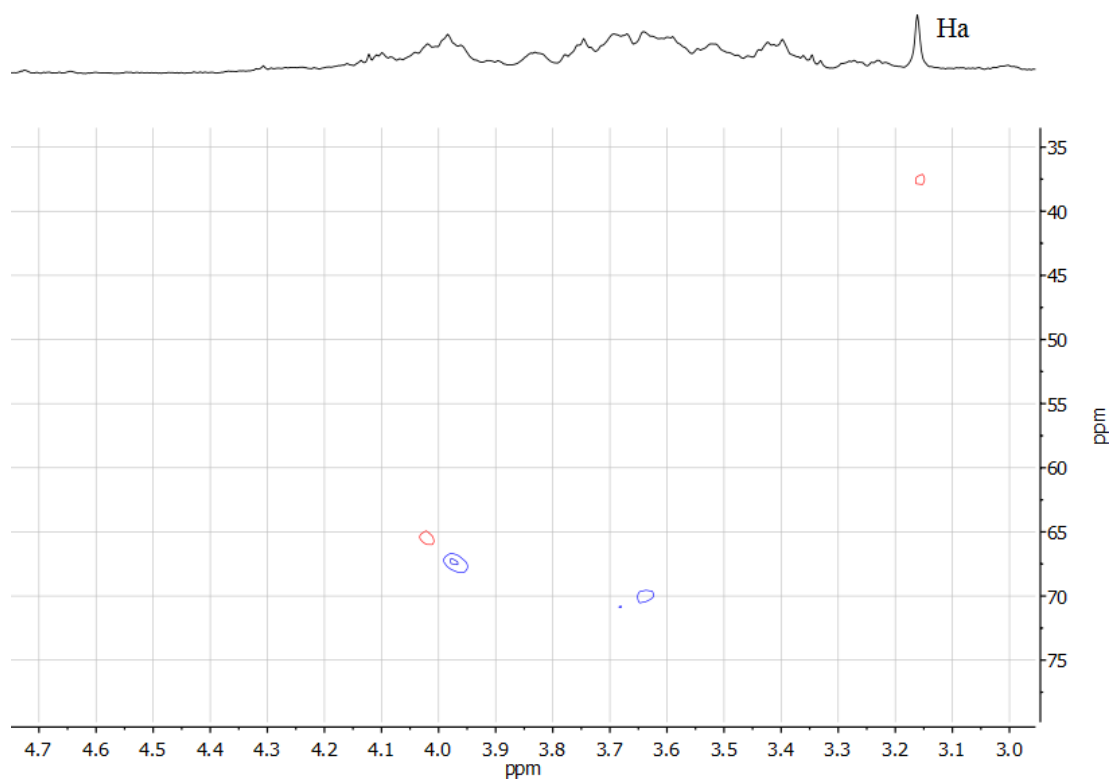

**Figure S8:** Partial HSQC NMR (500 MHz and 126 MHz, CDCl<sub>3</sub>) spectrum of rotaxane **1**·PF<sub>6</sub><sup>-</sup> showing a signal at 3.16 ppm in the CH/CH<sub>3</sub> phase, supporting its assignment as the *N*-methyl amide group Ha

### 3. NMR spectra of new compounds

#### Compound 4:

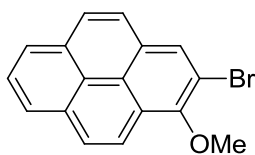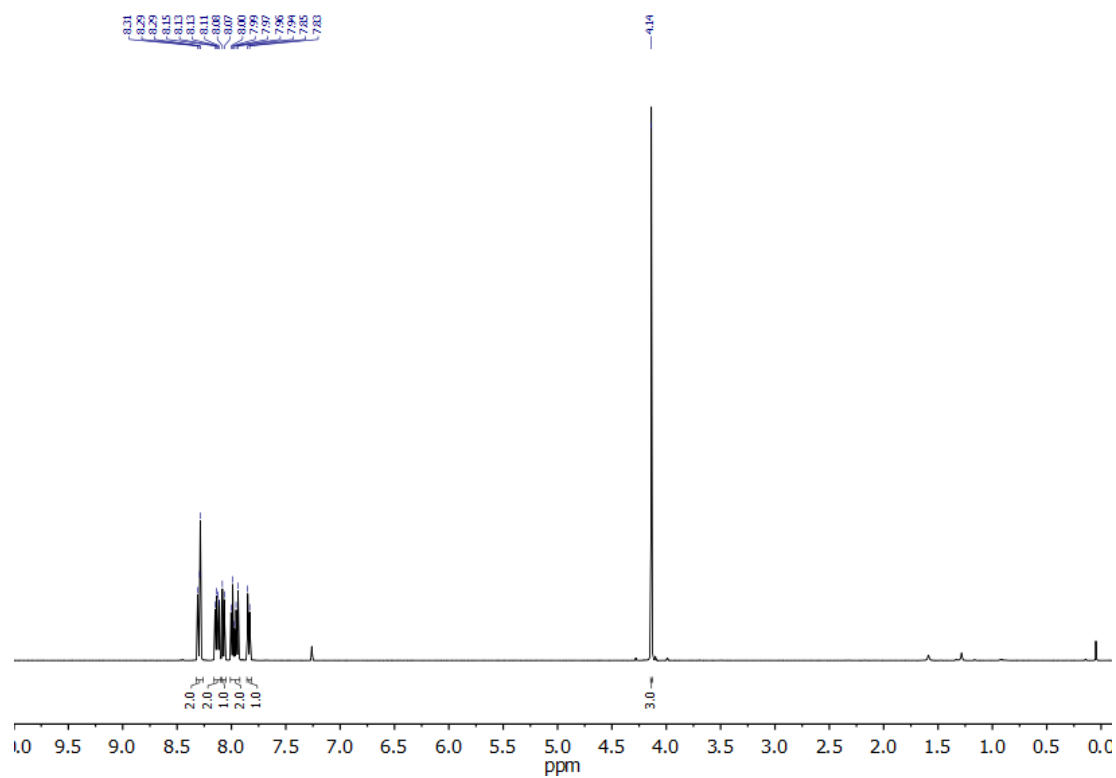

Figure S9: <sup>1</sup>H NMR (500 MHz, CDCl<sub>3</sub>) spectrum of 4.

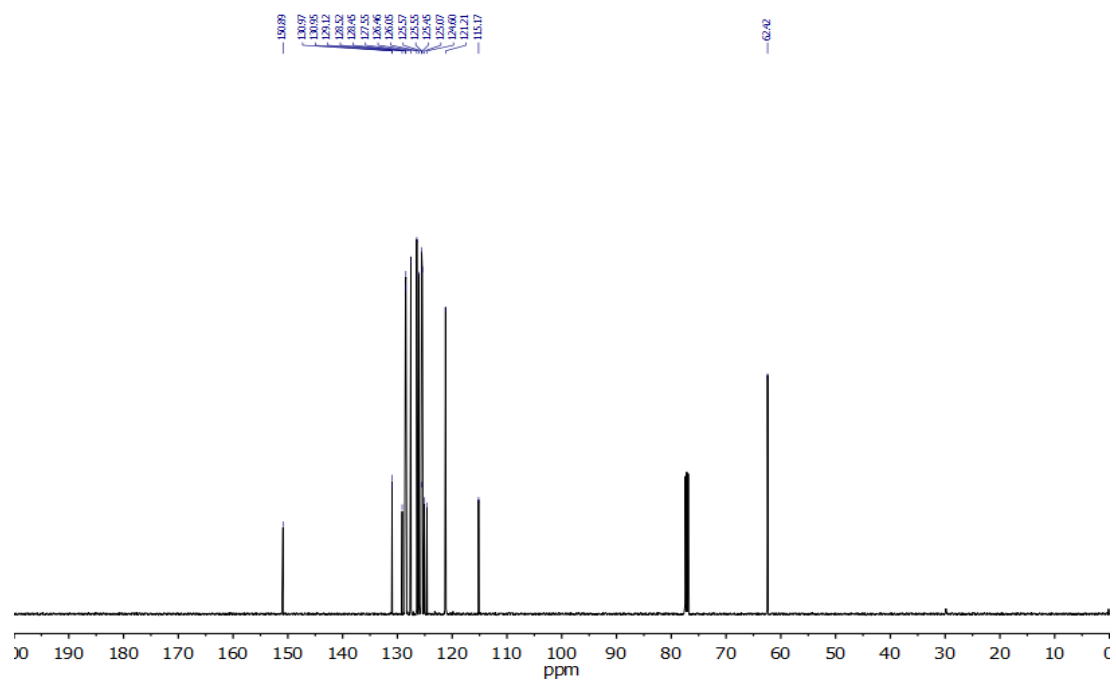

Figure S10: <sup>13</sup>C NMR (126 MHz, CDCl<sub>3</sub>) spectrum of 4.

**Compound S2:**

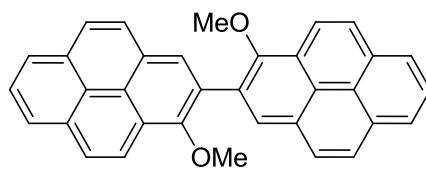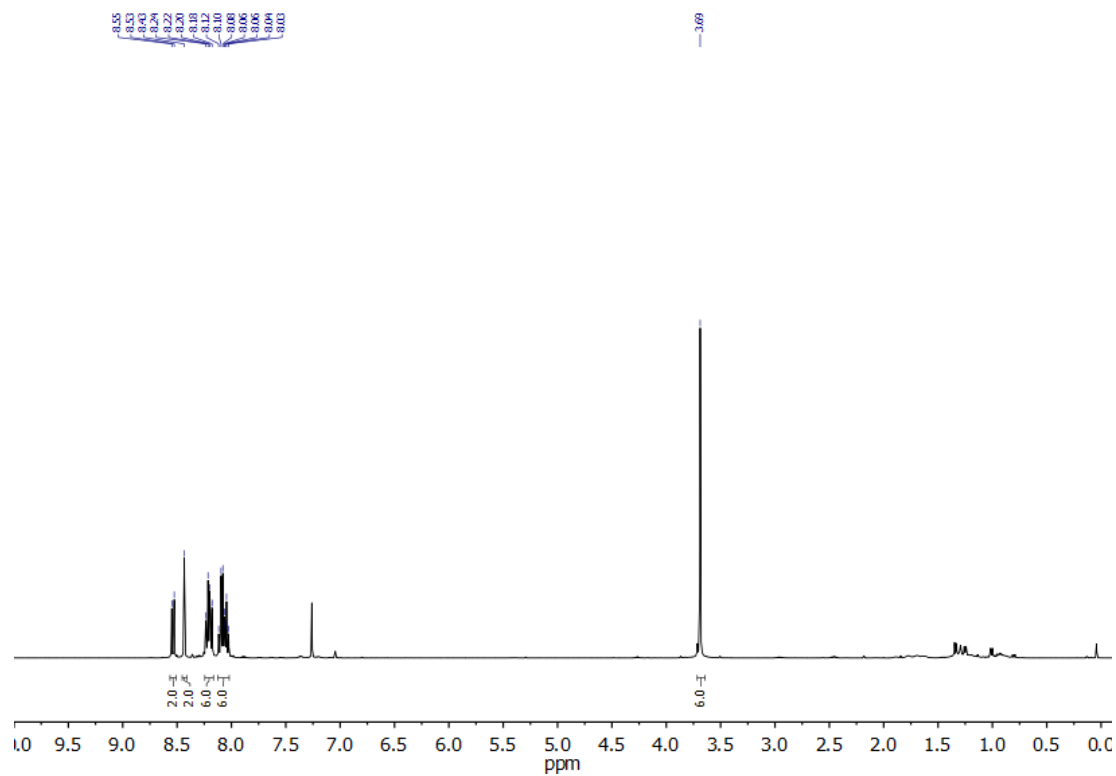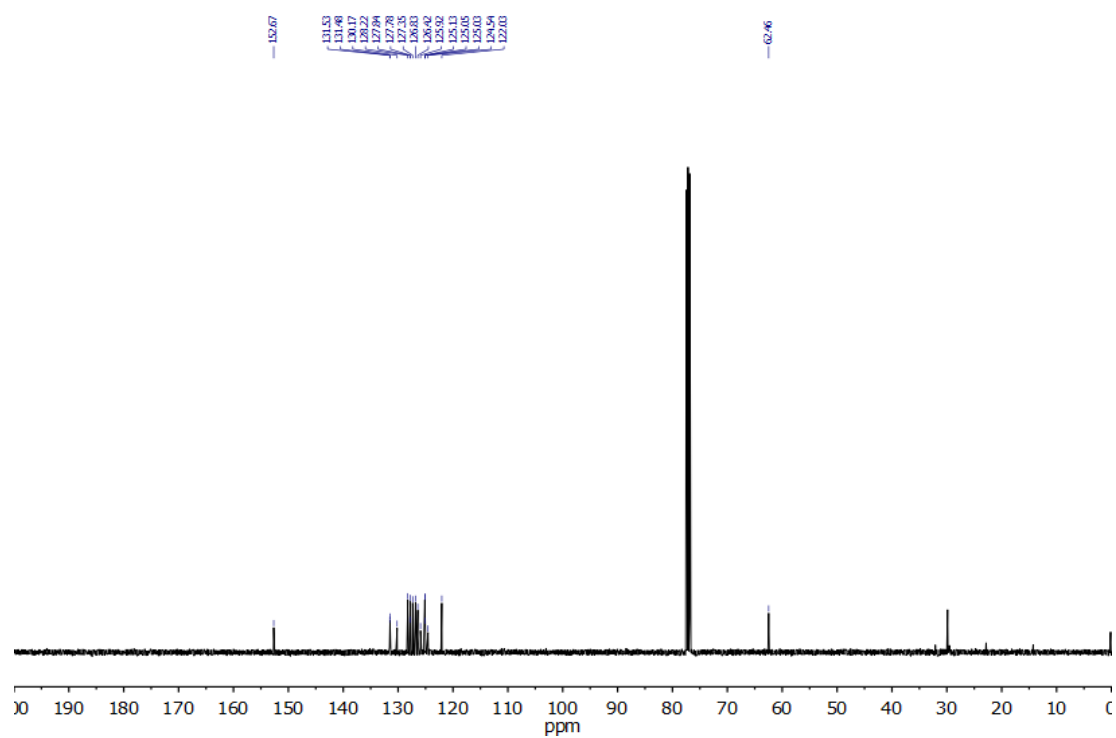

**Compound 5:**

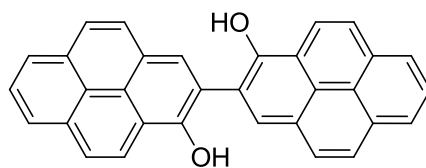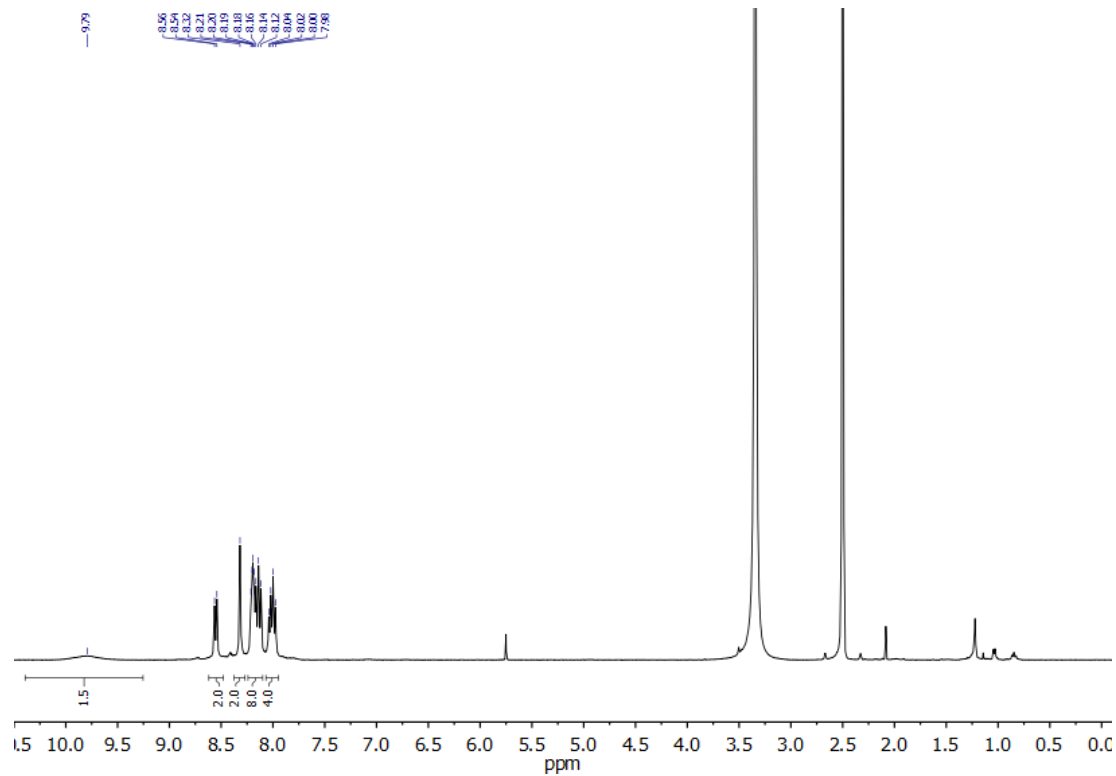

**Figure S13:** <sup>1</sup>H NMR (400 MHz, DMSO-*d*<sub>6</sub>) spectrum of **5**.

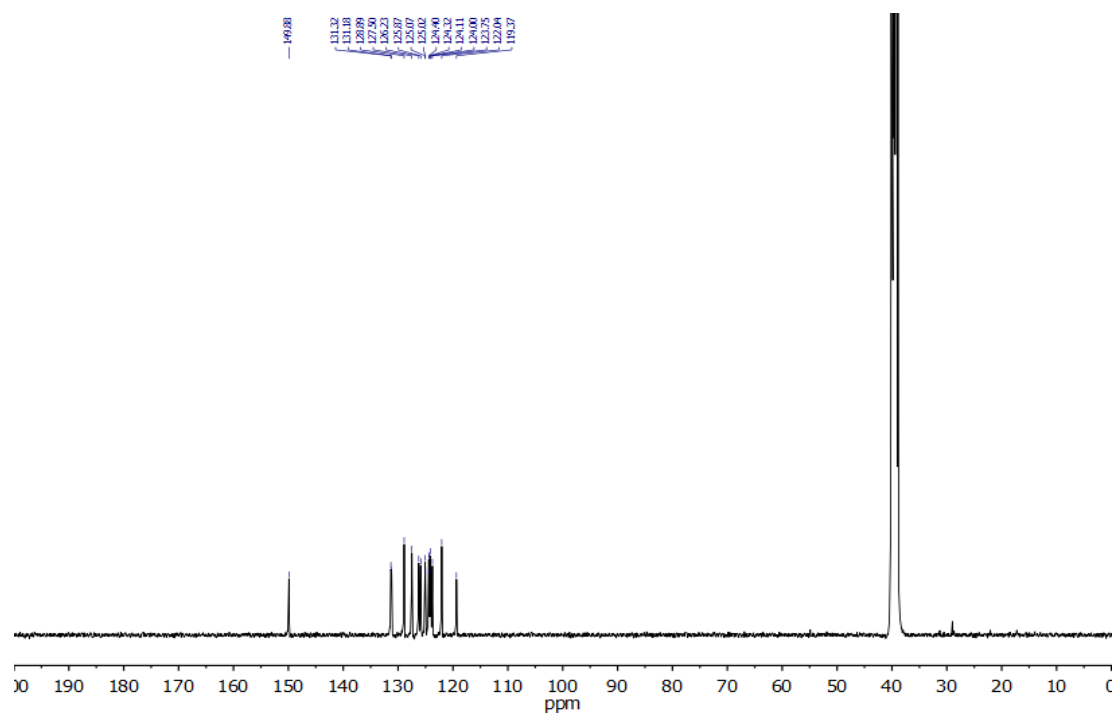

**Figure S14:** <sup>13</sup>C NMR (101 MHz, DMSO-*d*<sub>6</sub>) spectrum of **5**.

**Compound 7:**

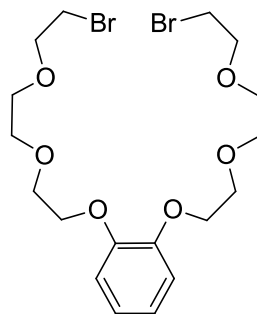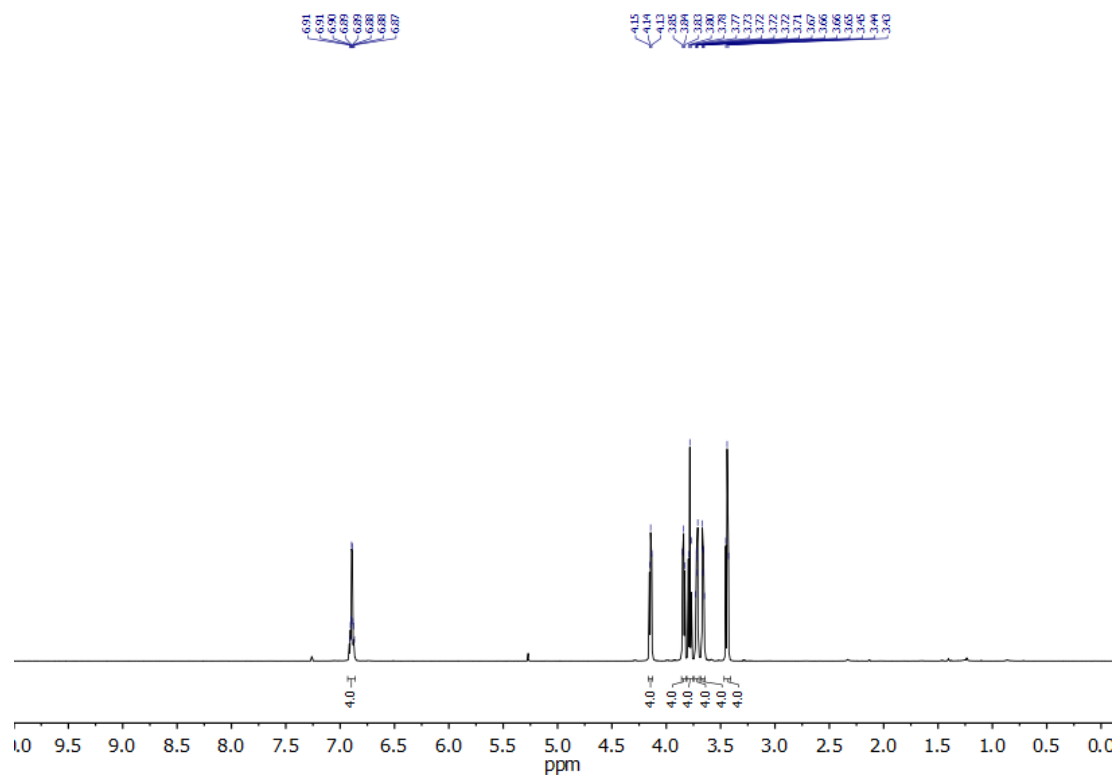

**Figure S15:** <sup>1</sup>H NMR (500 MHz, CDCl<sub>3</sub>) spectrum of **7**.

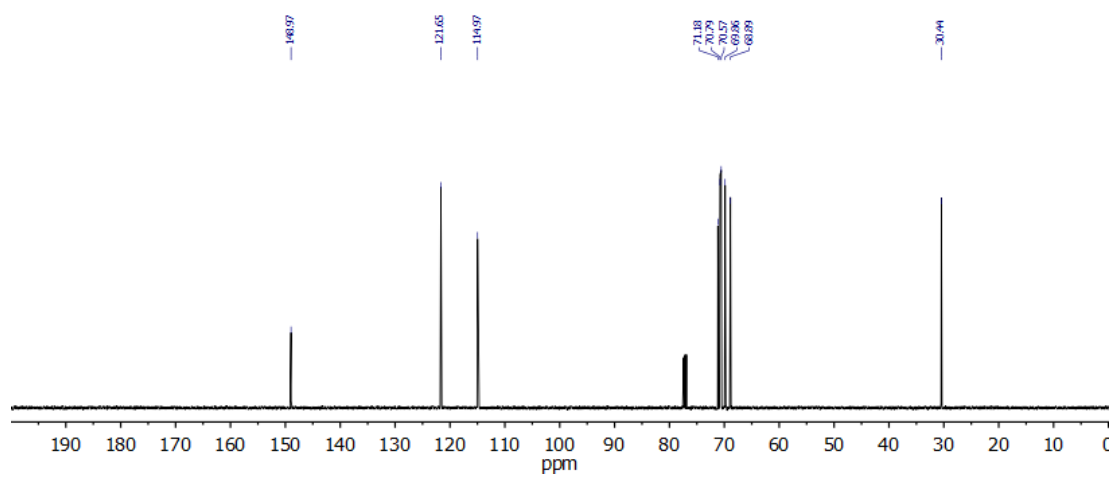

**Figure S16:** <sup>13</sup>C NMR (126 MHz, CDCl<sub>3</sub>) spectrum of **7**.



**Compound 8:**

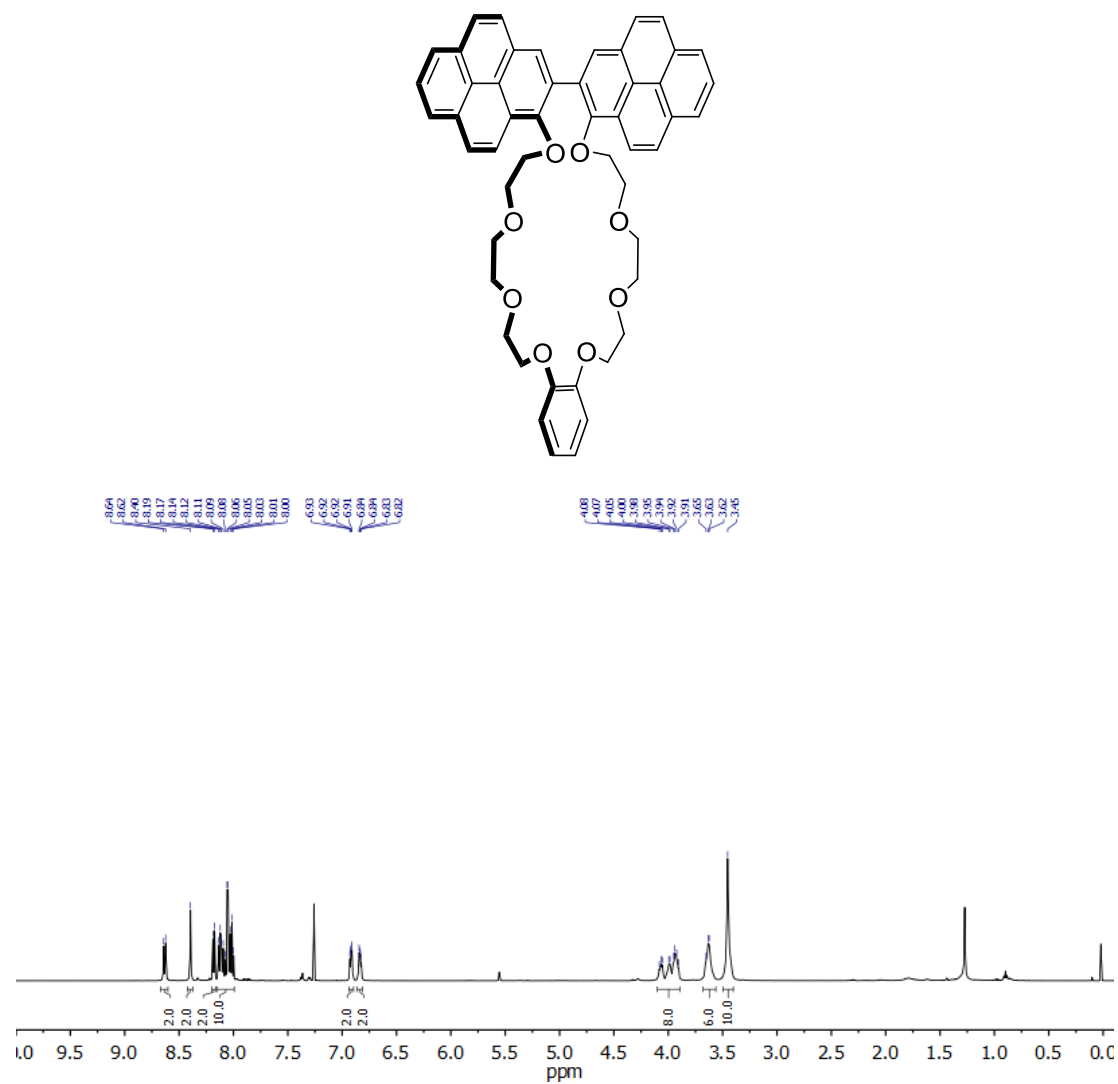

**Figure S17:**  $^1\text{H}$  NMR (500 MHz,  $\text{CDCl}_3$ ) spectrum of **8**.

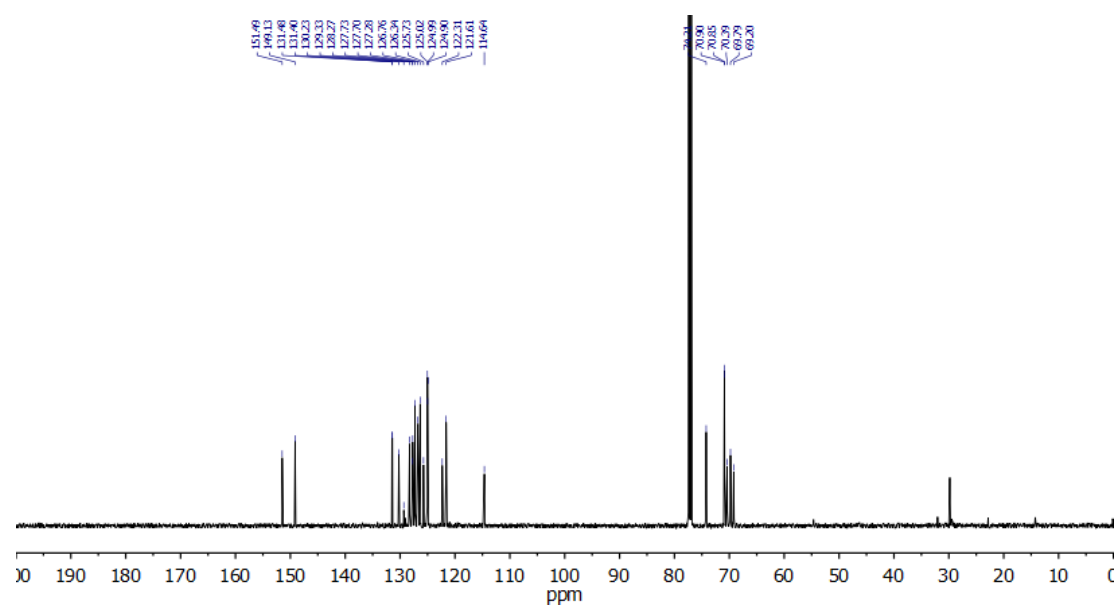

**Figure S18:**  $^{13}\text{C}$  NMR (126 MHz,  $\text{CDCl}_3$ ) spectrum of **8**.

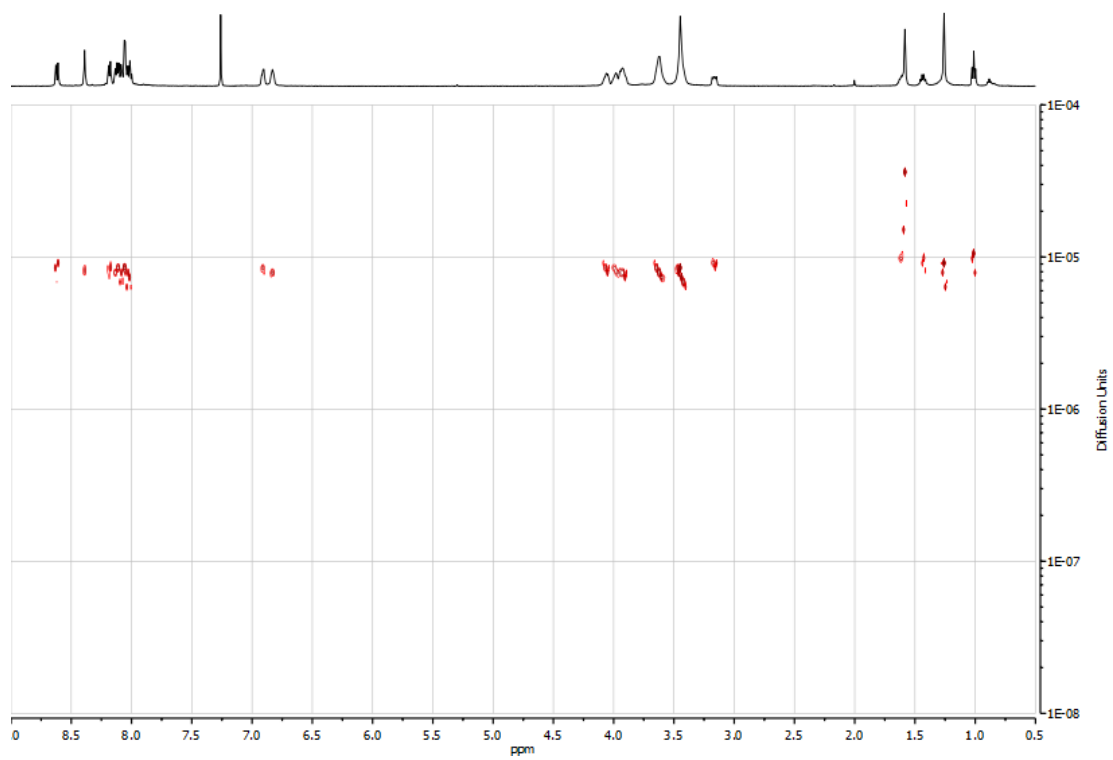

**Figure S19:** DOSY NMR (500 MHz, CDCl<sub>3</sub>) spectrum of **8**.

**Compound 8·K<sup>+</sup>:**

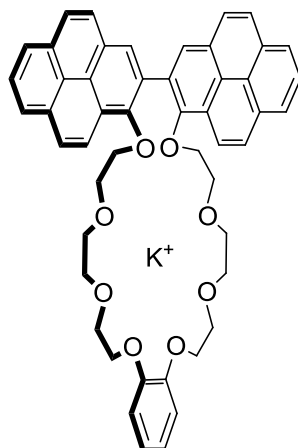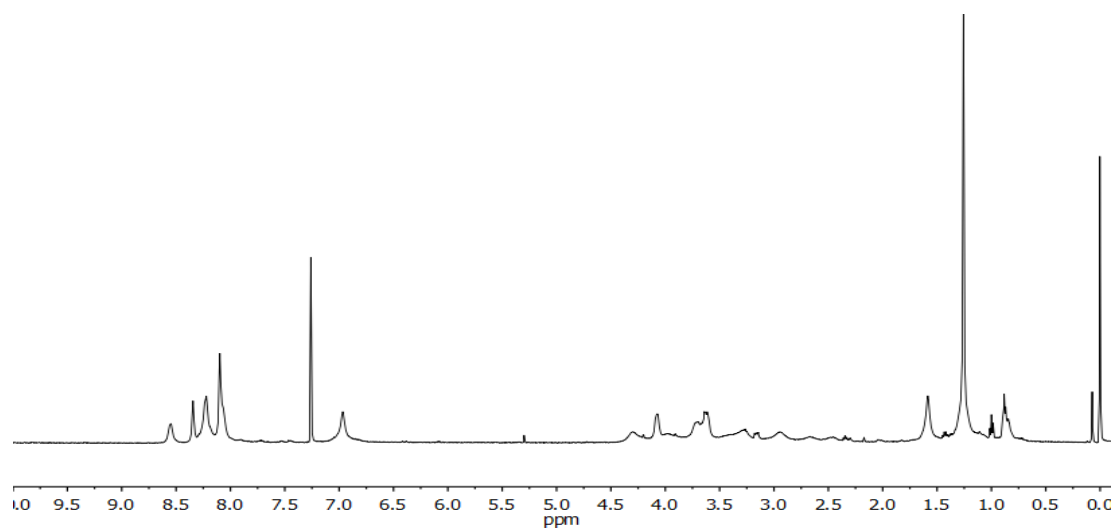

**Figure S20:** <sup>1</sup>H NMR (500 MHz, CDCl<sub>3</sub>) spectrum of 8·K<sup>+</sup>.

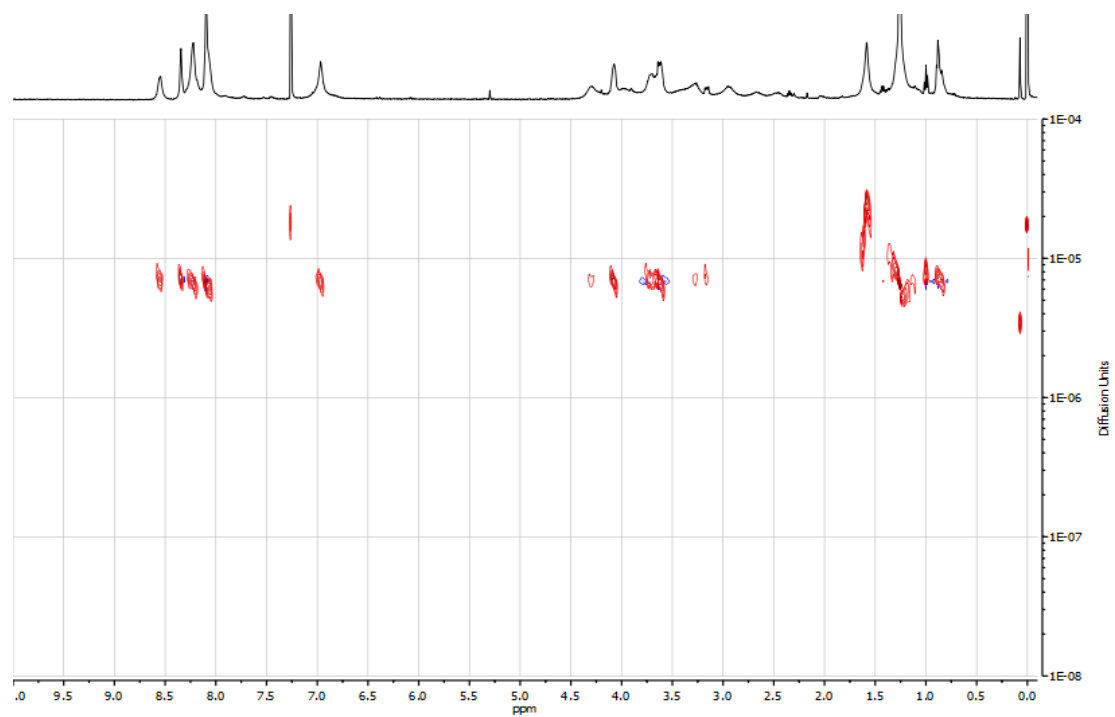

**Figure S21:** DOSY NMR (500 MHz, CDCl<sub>3</sub>) spectrum of 8·K<sup>+</sup>.

**Compound S4:**

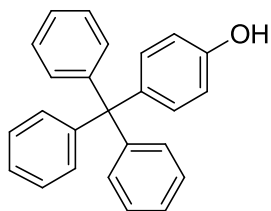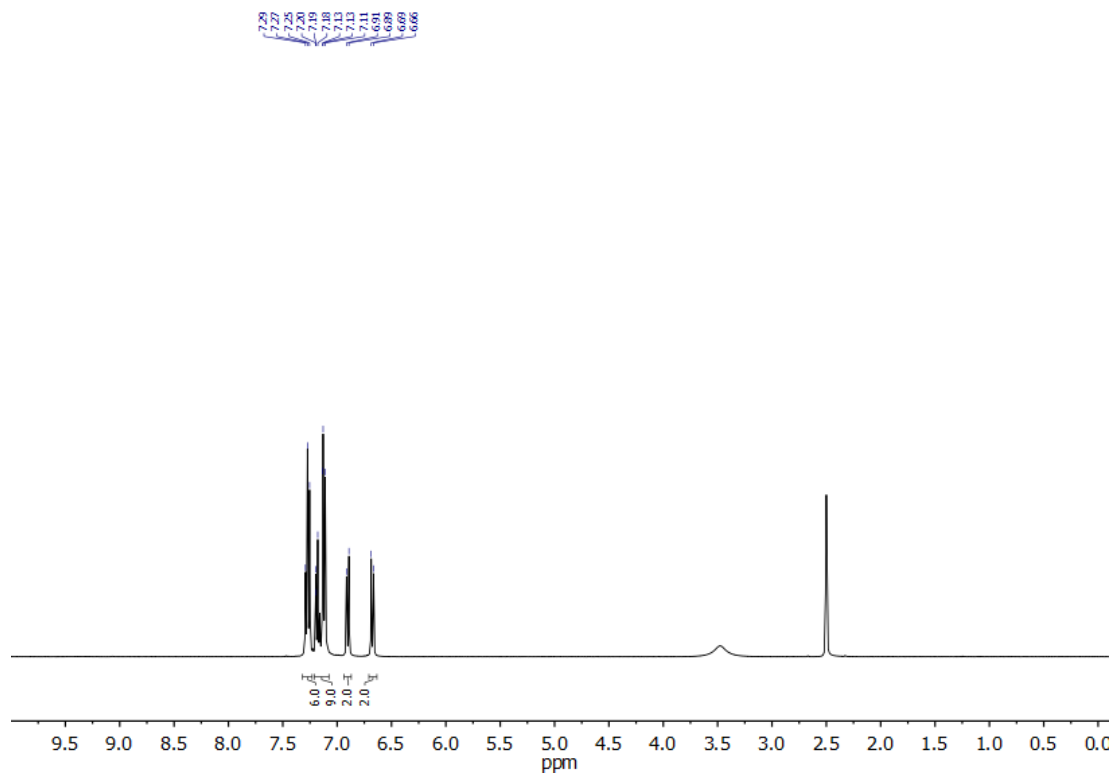

**Figure S22:** <sup>1</sup>H NMR (400 MHz, DMSO-*d*<sub>6</sub>) spectrum of S4.

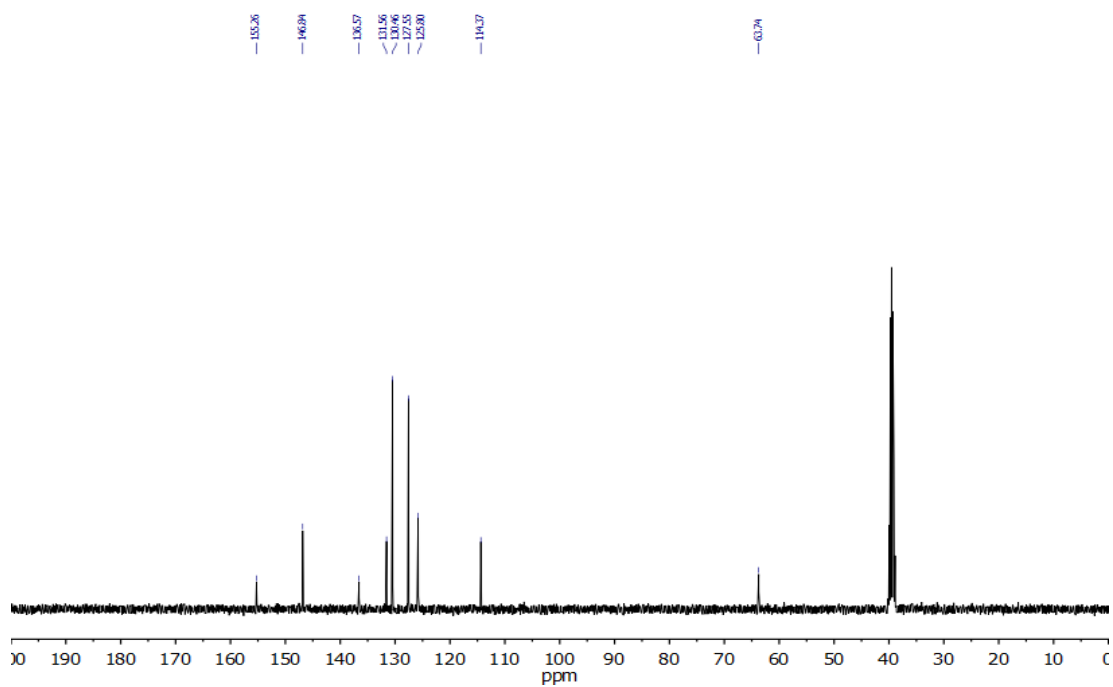

**Figure S23:** <sup>13</sup>C NMR (101 MHz, DMSO-*d*<sub>6</sub>) spectrum of S4.

Compound S5:

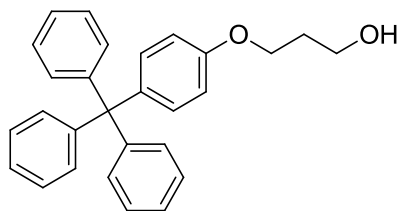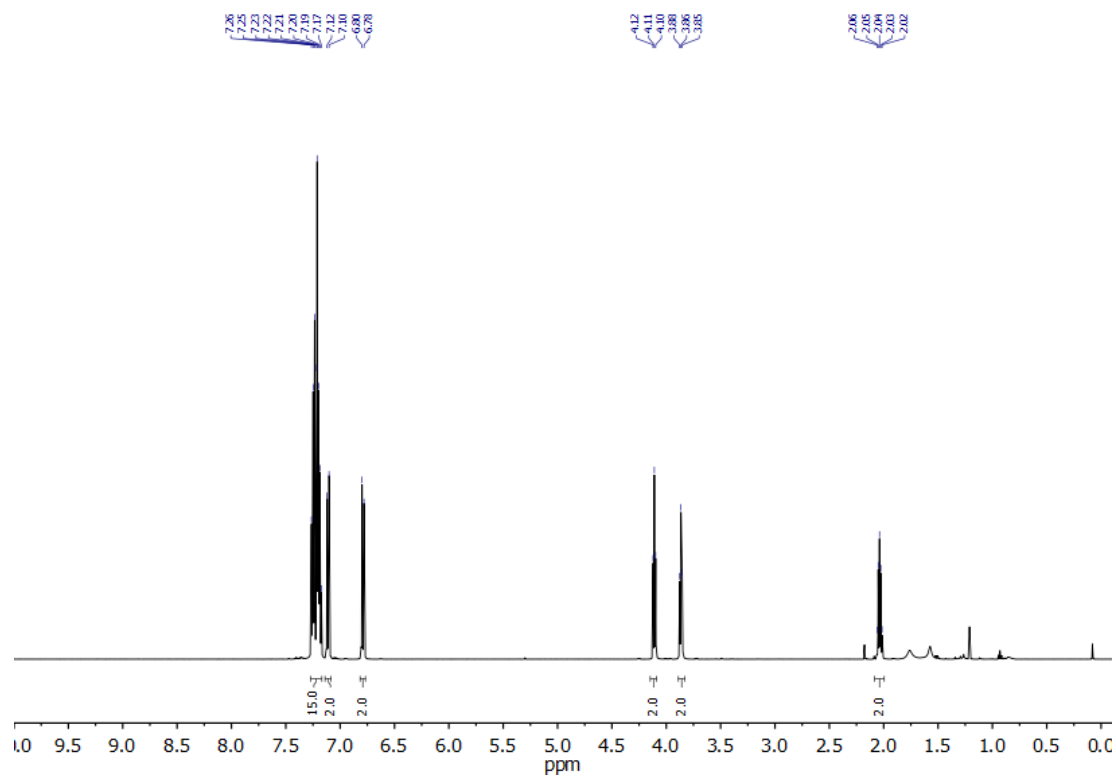

Figure S24:  $^1\text{H}$  NMR (500 MHz,  $\text{CDCl}_3$ ) spectrum of S5.

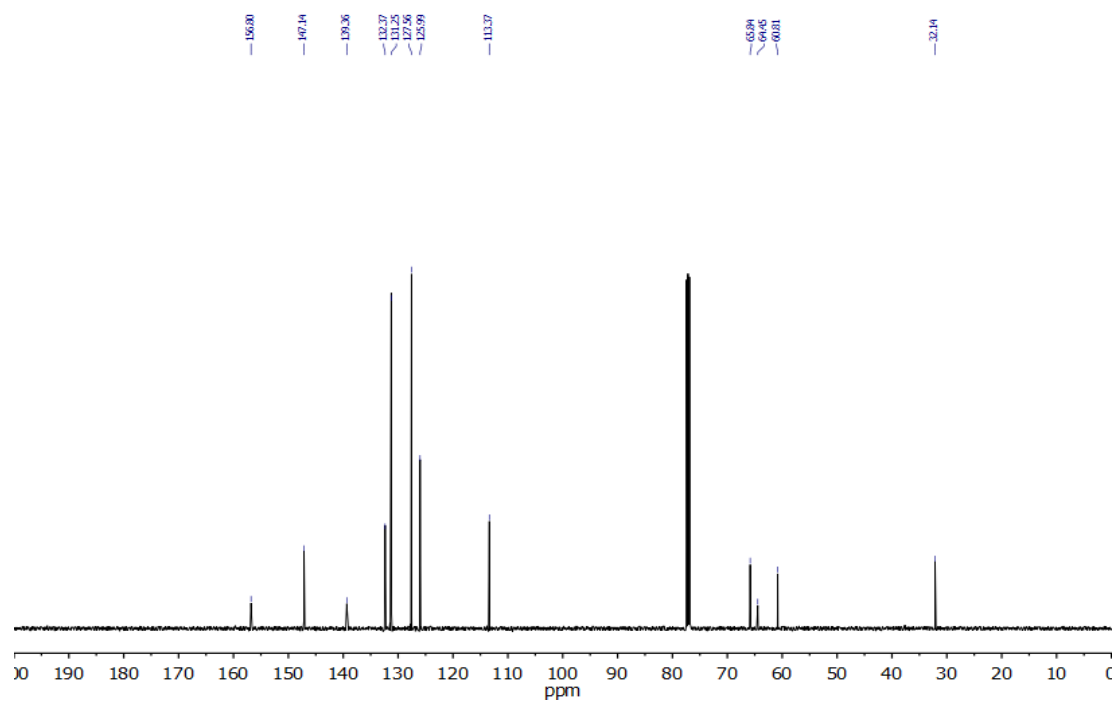

Figure S25:  $^{13}\text{C}$  NMR (126 MHz,  $\text{CDCl}_3$ ) spectrum of S5.

**Compound S6:**

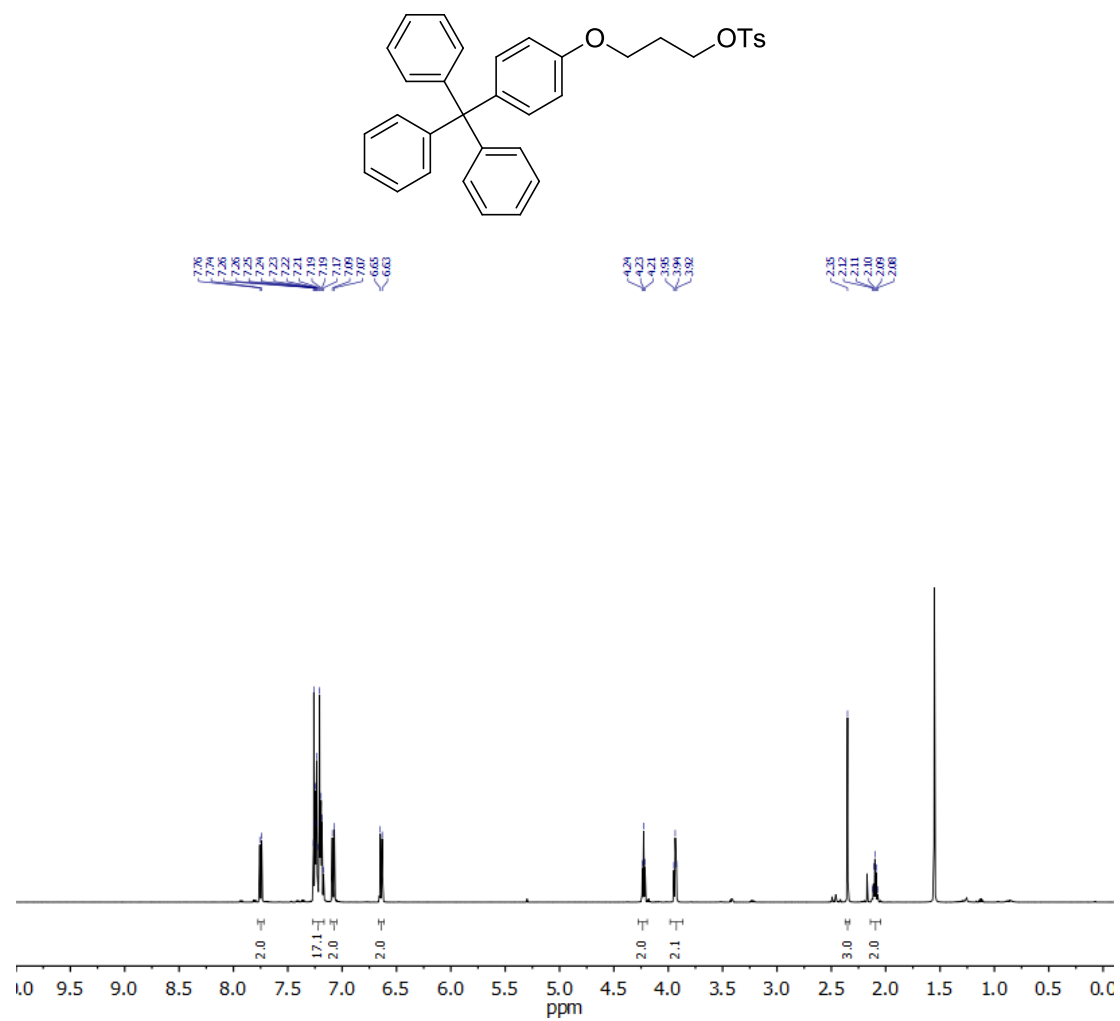

**Figure S26:** <sup>1</sup>H NMR (500 MHz, CDCl<sub>3</sub>) spectrum of S6.

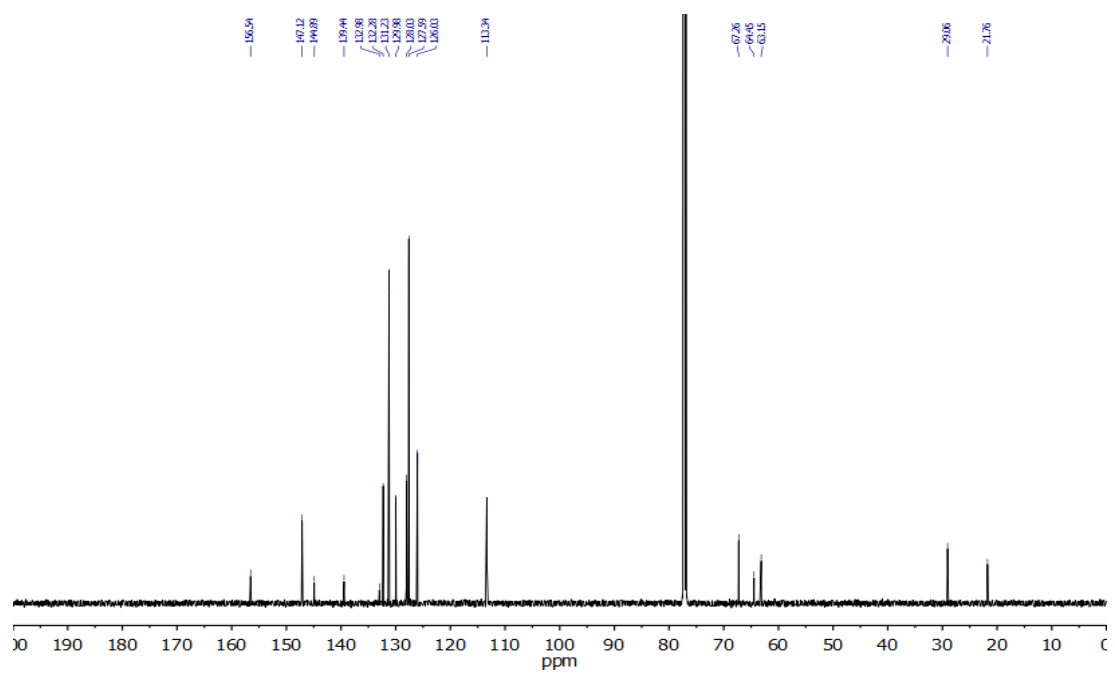

**Figure S27:** <sup>13</sup>C NMR (126 MHz, CDCl<sub>3</sub>) spectrum of S6.

Compound 12:

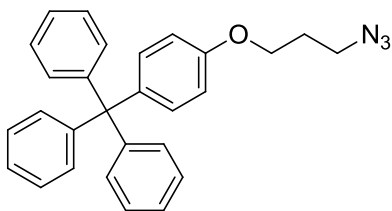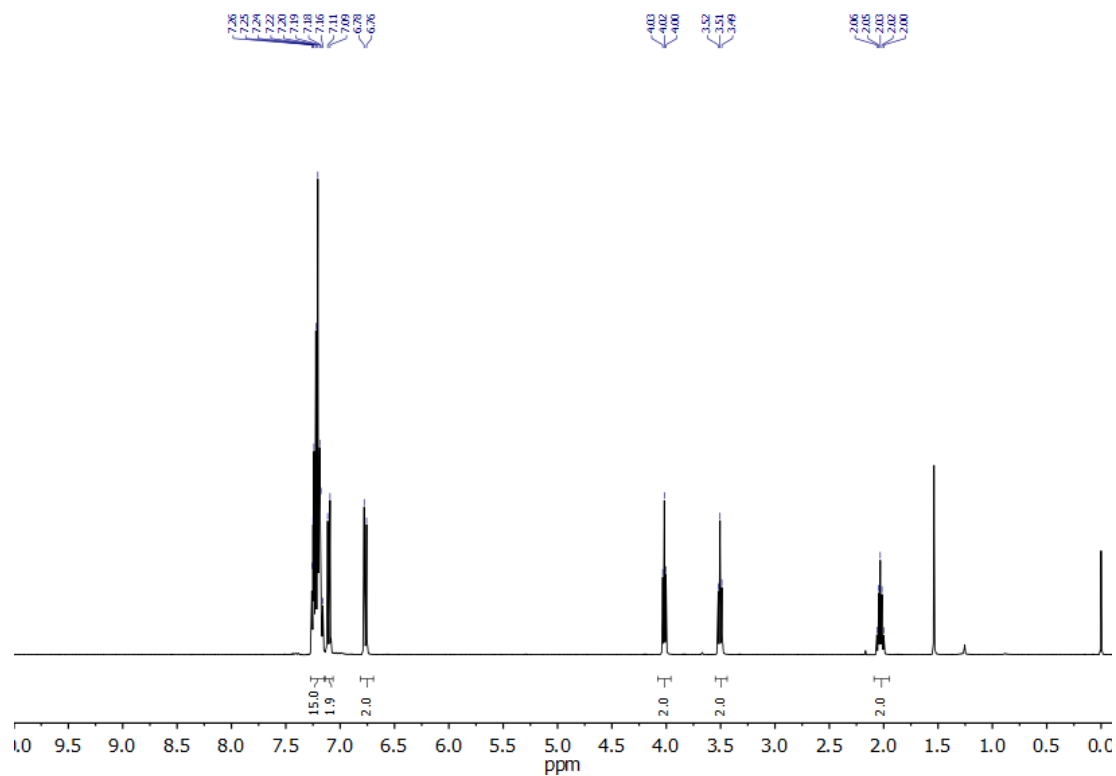

Figure S28:  $^1\text{H}$  NMR (400 MHz,  $\text{CDCl}_3$ ) spectrum of 12.

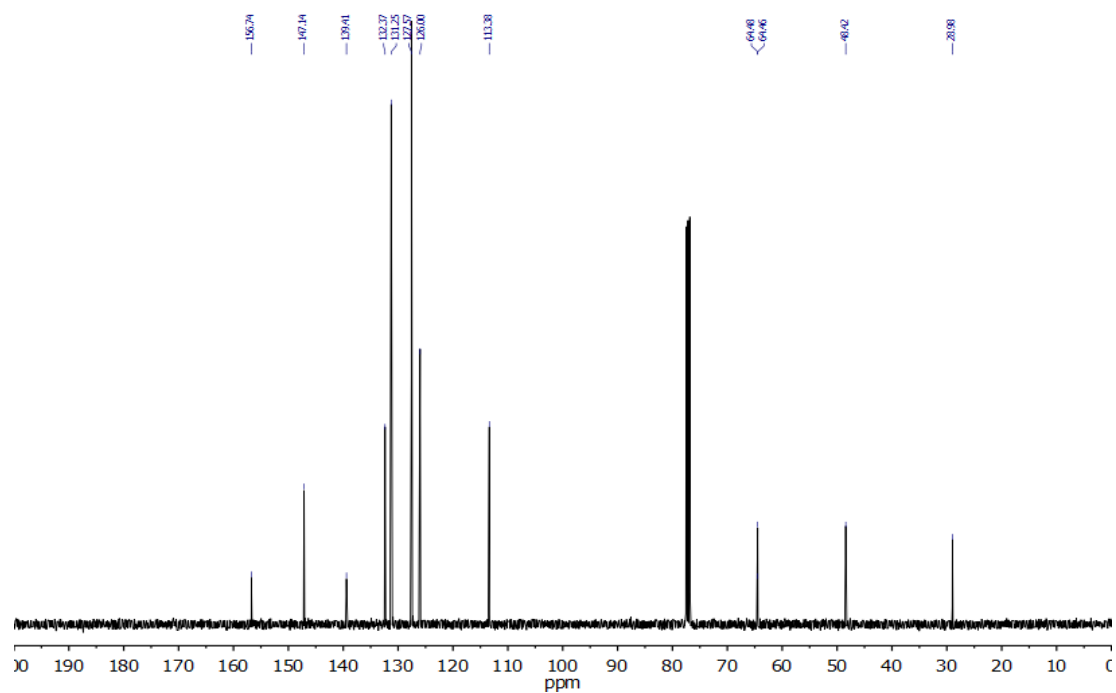

Figure S29:  $^{13}\text{C}$  NMR (101 MHz,  $\text{CDCl}_3$ ) spectrum of 12.

Compound S7:

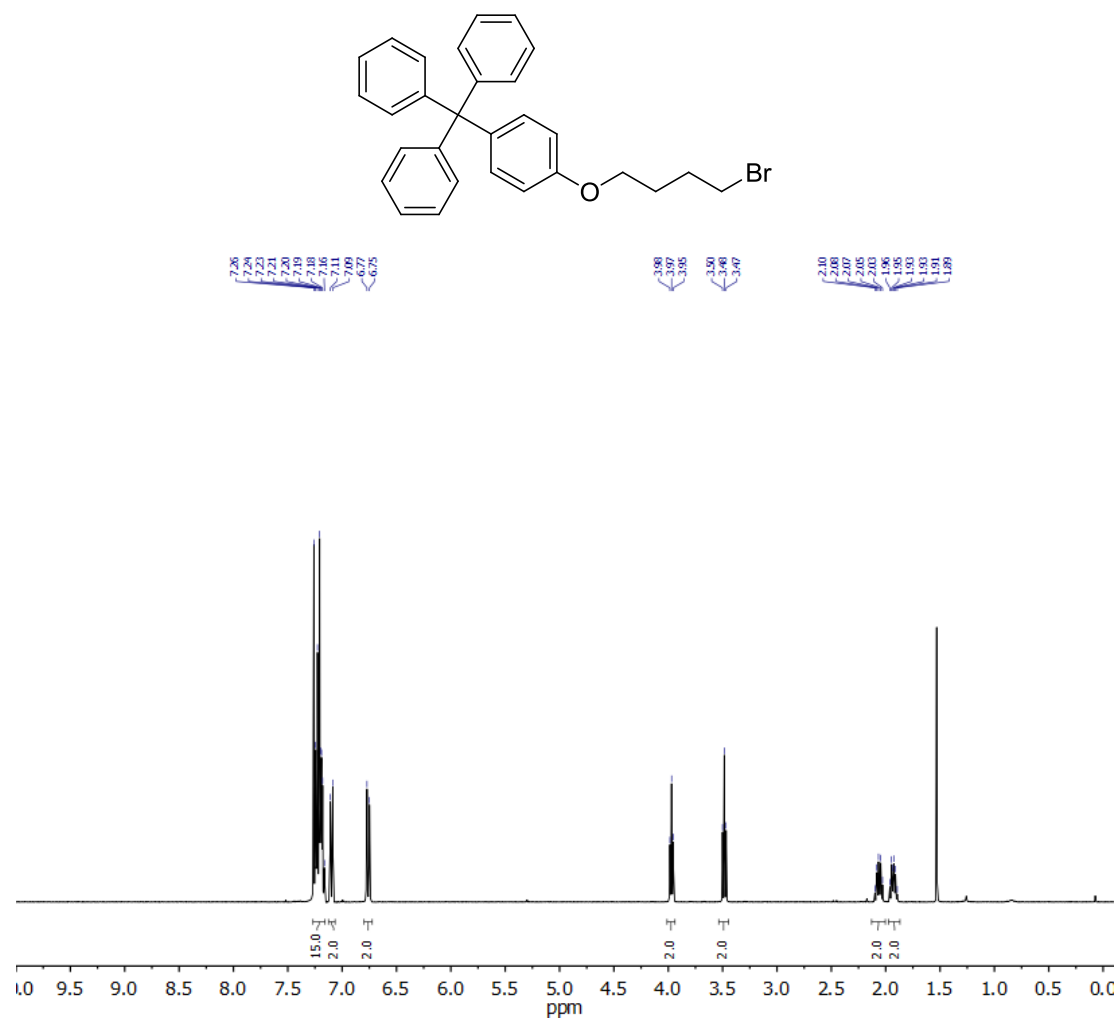

Figure S30: <sup>1</sup>H NMR (400 MHz, CDCl<sub>3</sub>) spectrum of S7.

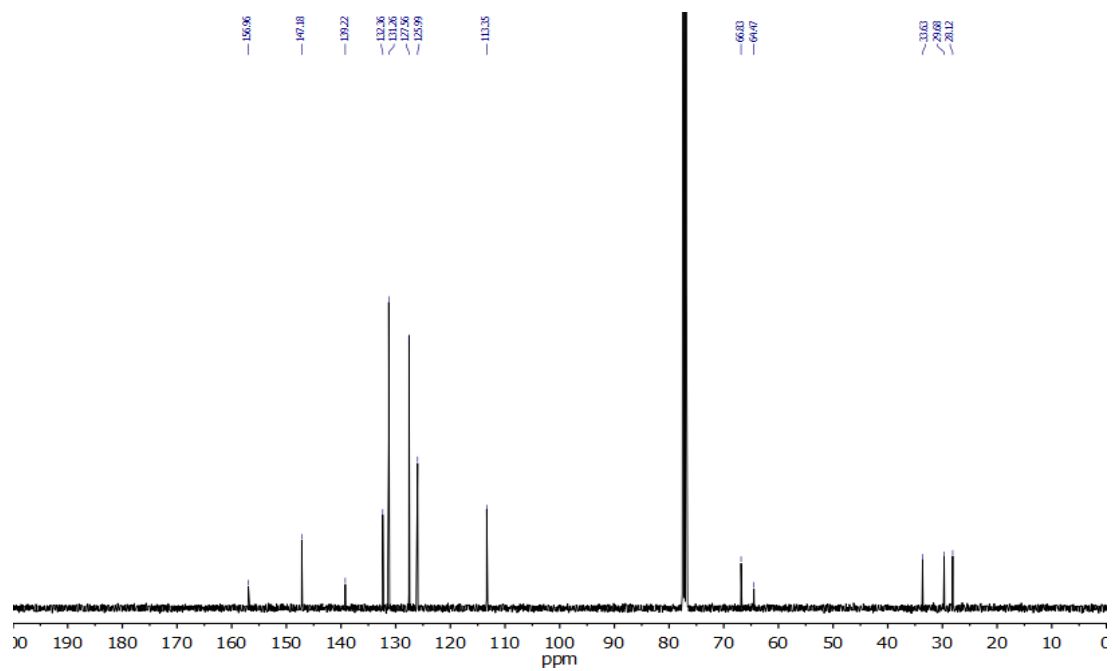

Figure S31: <sup>13</sup>C NMR (101 MHz, CDCl<sub>3</sub>) spectrum of S7.



**Compound S9:**

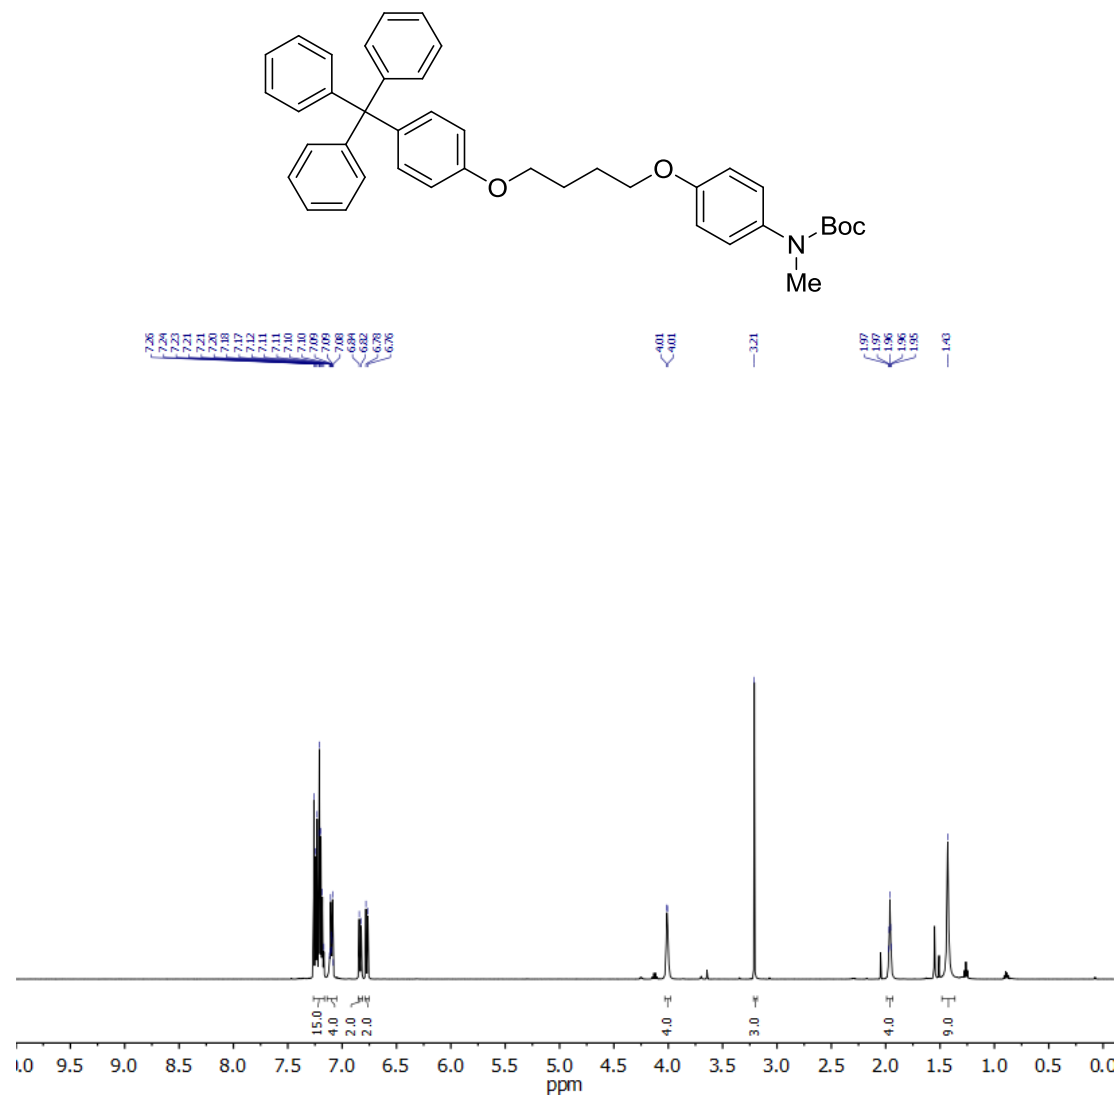

**Figure S32:** <sup>1</sup>H NMR (500 MHz, CDCl<sub>3</sub>) spectrum of S9.

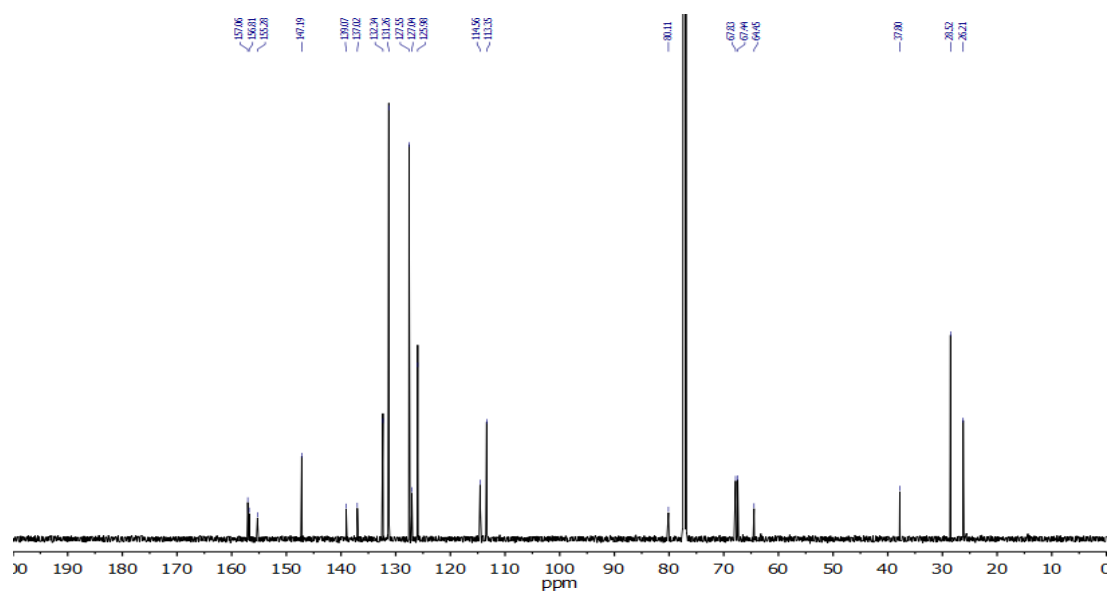

**Figure S33:** <sup>13</sup>C NMR (126 MHz, CDCl<sub>3</sub>) spectrum of S9.



**Compound S10:**

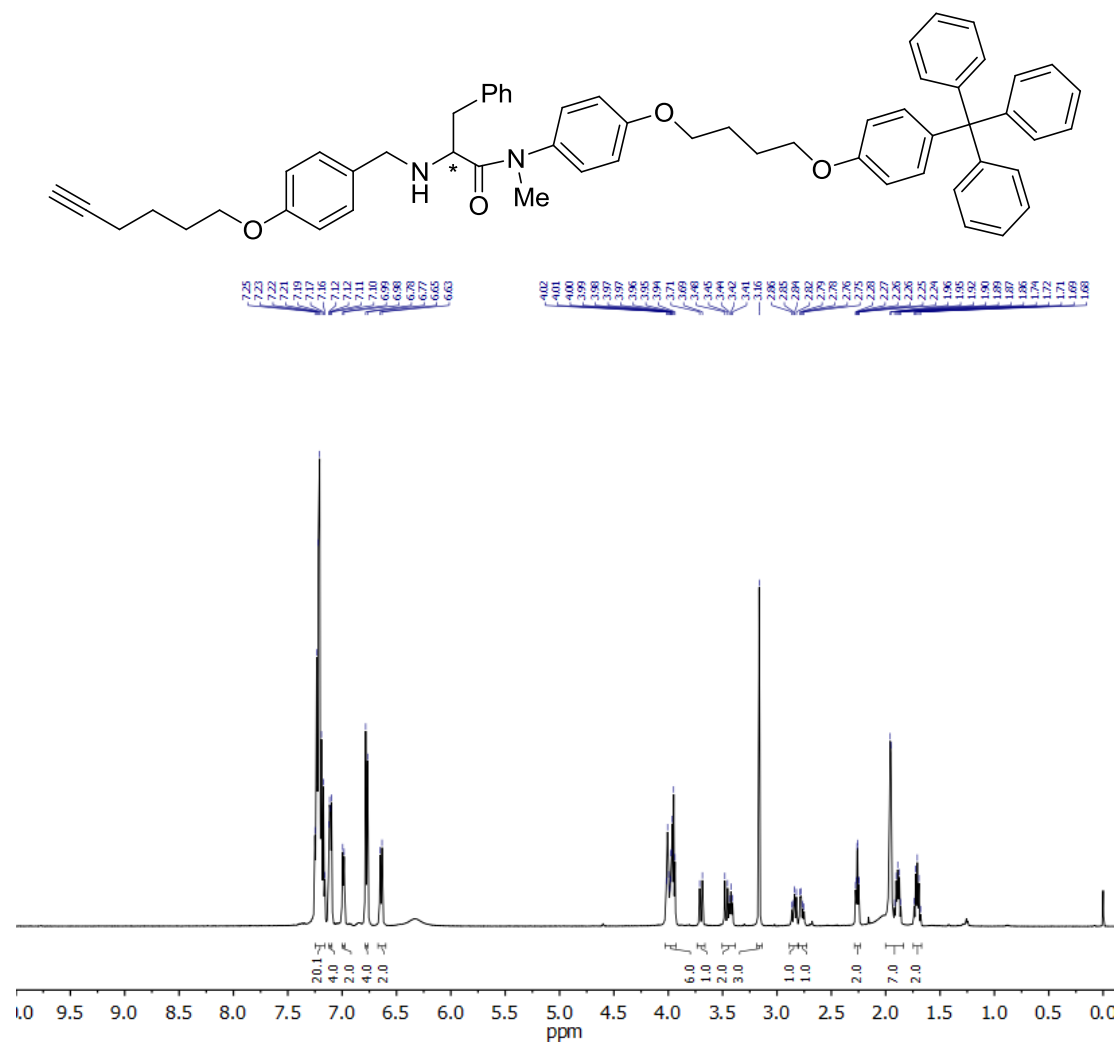

**Figure S36:** <sup>1</sup>H NMR (500 MHz, CDCl<sub>3</sub>) spectrum of S10.

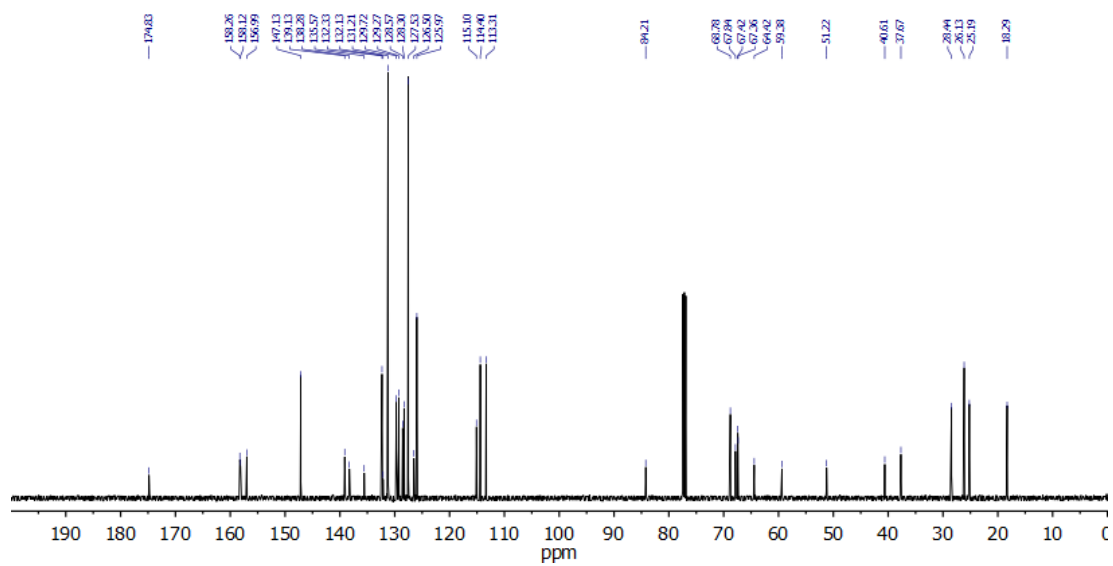

**Figure S37:** <sup>13</sup>C NMR (126 MHz, CDCl<sub>3</sub>) spectrum of S10.

Compound **11-H<sup>+</sup>·PF<sub>6</sub><sup>-</sup>**:

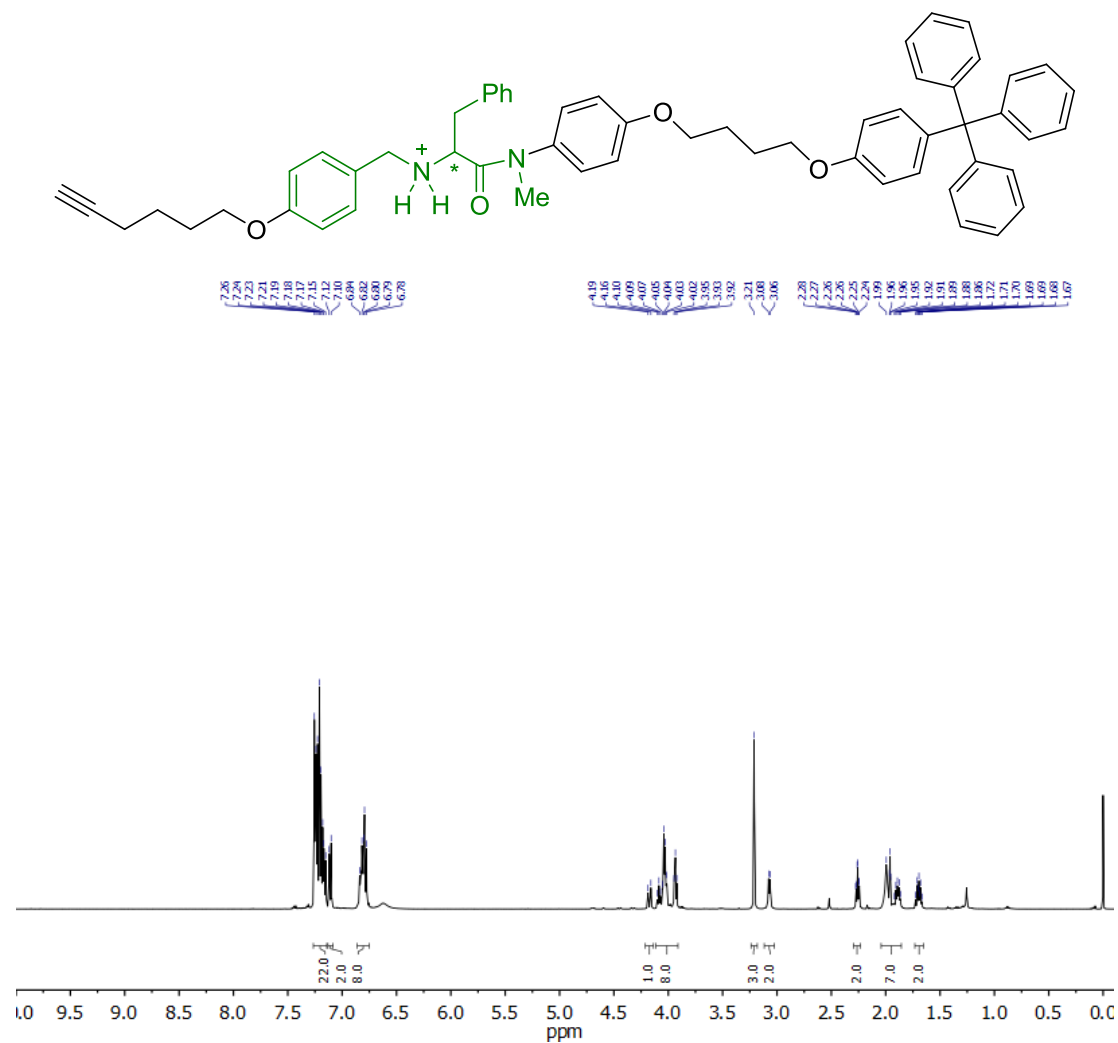

Figure S38: <sup>1</sup>H NMR (500 MHz, CDCl<sub>3</sub>) spectrum of **11-H<sup>+</sup>·PF<sub>6</sub><sup>-</sup>**.

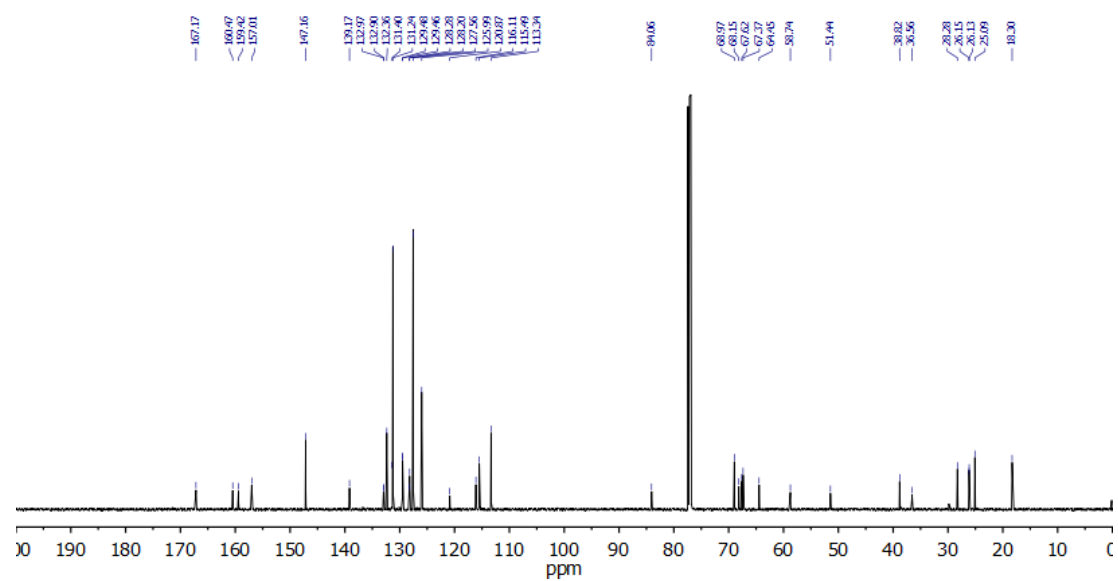

Figure S39: <sup>13</sup>C NMR (126 MHz, CDCl<sub>3</sub>) spectrum of **11-H<sup>+</sup>·PF<sub>6</sub><sup>-</sup>**.

**Compound 14-H<sup>+</sup>·PF<sub>6</sub><sup>-</sup>:**

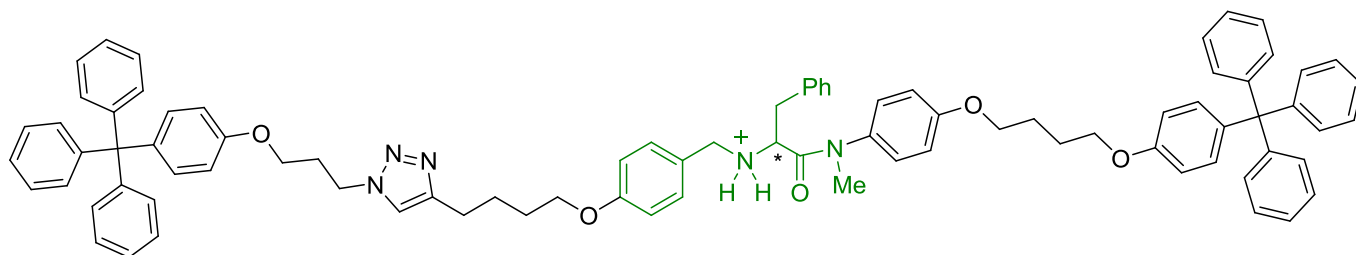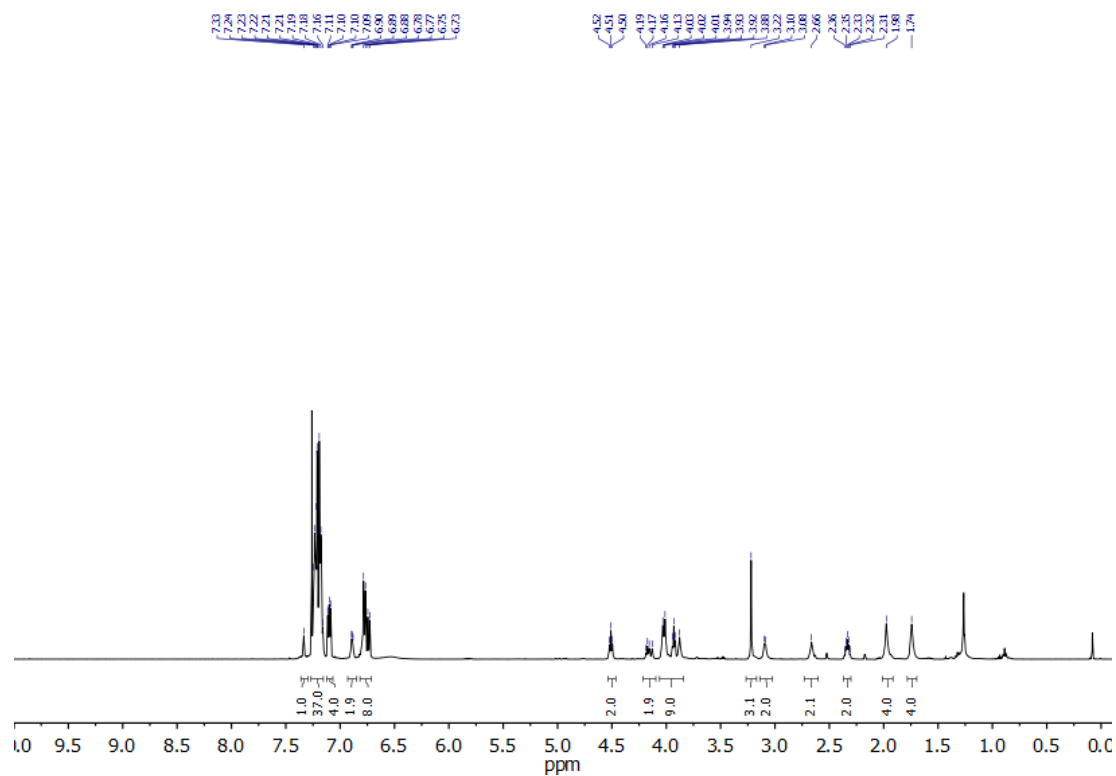

**Figure S40:** <sup>1</sup>H NMR (500 MHz, CDCl<sub>3</sub>) spectrum of 14-H<sup>+</sup>·PF<sub>6</sub><sup>-</sup>.

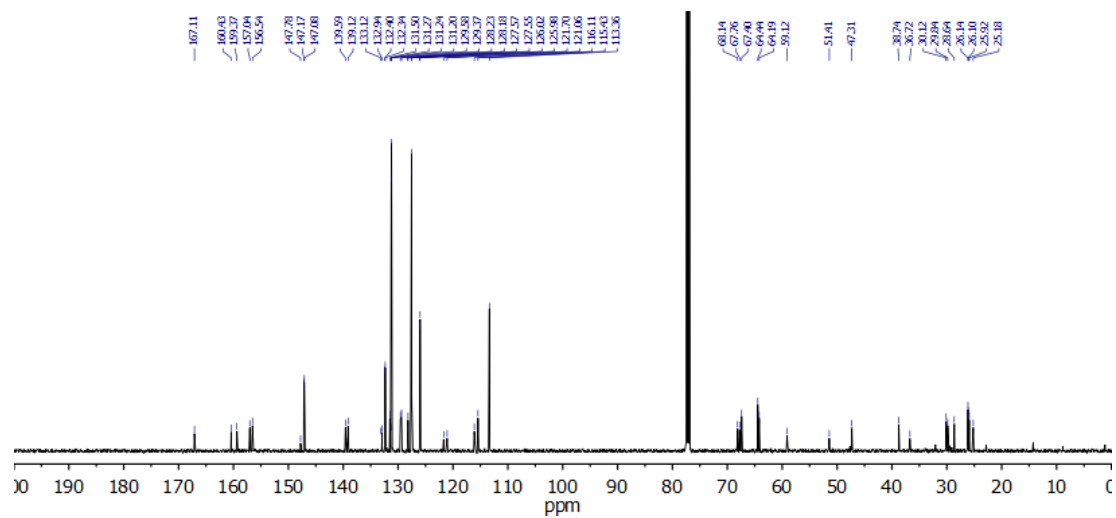

**Figure S41:** <sup>13</sup>C NMR (126 MHz, CDCl<sub>3</sub>) spectrum of 14-H<sup>+</sup>·PF<sub>6</sub><sup>-</sup>.

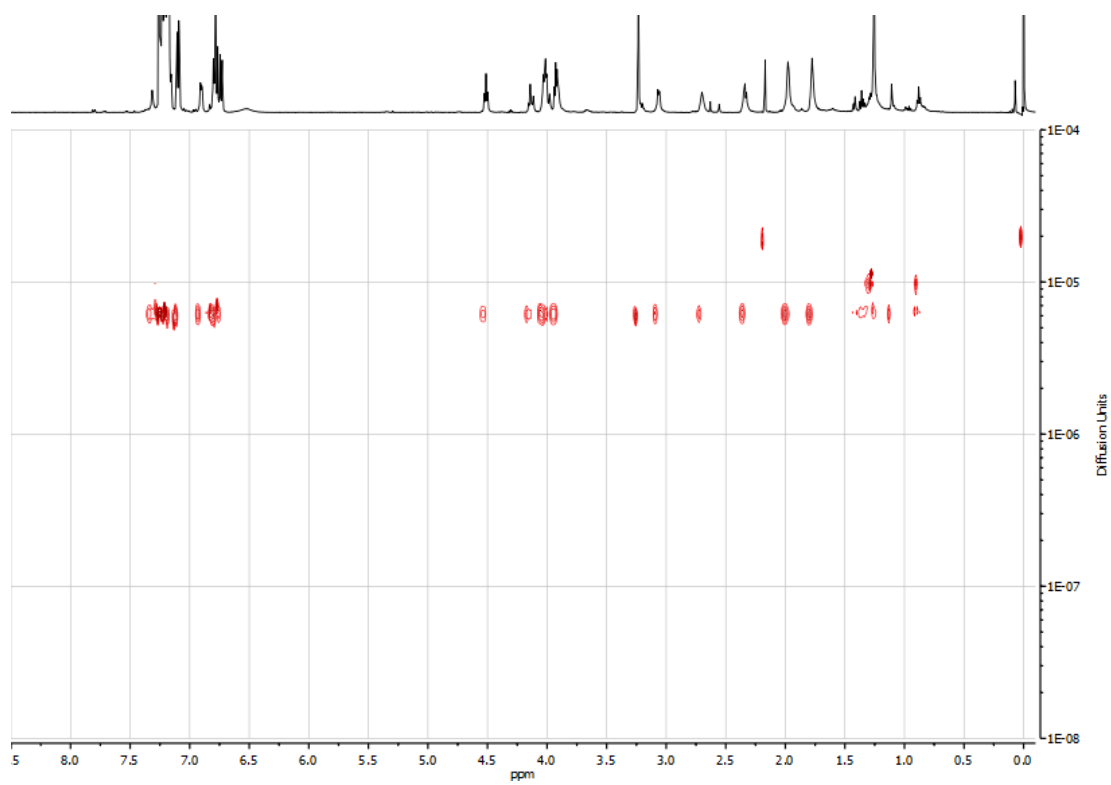

**Figure S42:** DOSY NMR (500 MHz, CDCl<sub>3</sub>) spectrum of **14-H<sup>+</sup>·PF<sub>6</sub><sup>-</sup>**.

Compound  $2\text{-H}^+ \cdot 2\text{PF}_6^-$ :

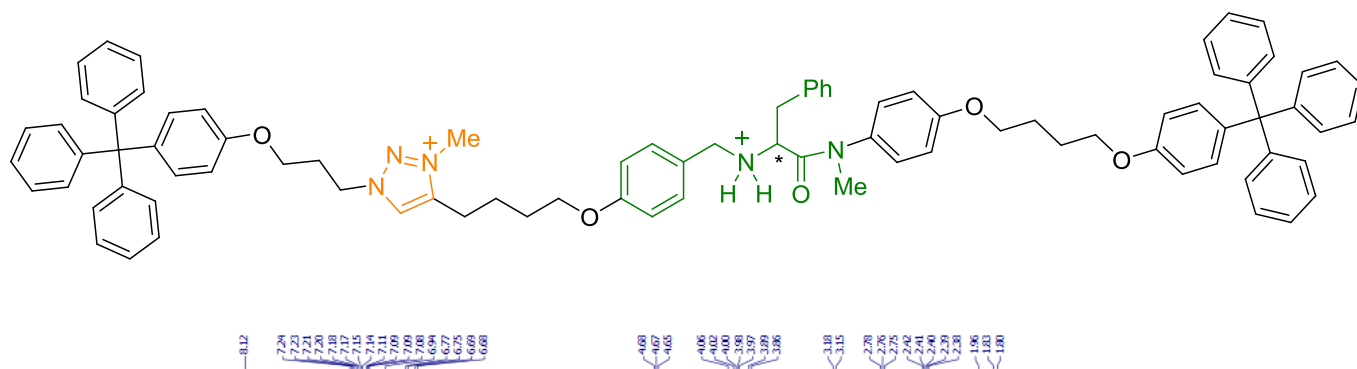

Figure S43: <sup>1</sup>H NMR (500 MHz, CDCl<sub>3</sub>) spectrum of  $2\text{-H}^+ \cdot 2\text{PF}_6^-$ .

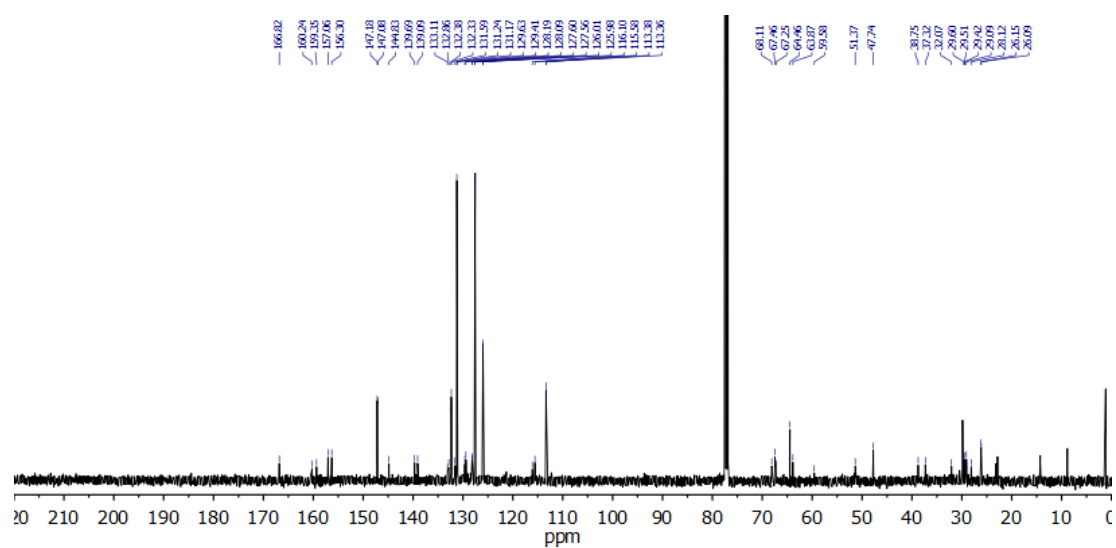

Figure S44: <sup>13</sup>C NMR (126 MHz, CDCl<sub>3</sub>) spectrum of  $2\text{-H}^+ \cdot 2\text{PF}_6^-$ .

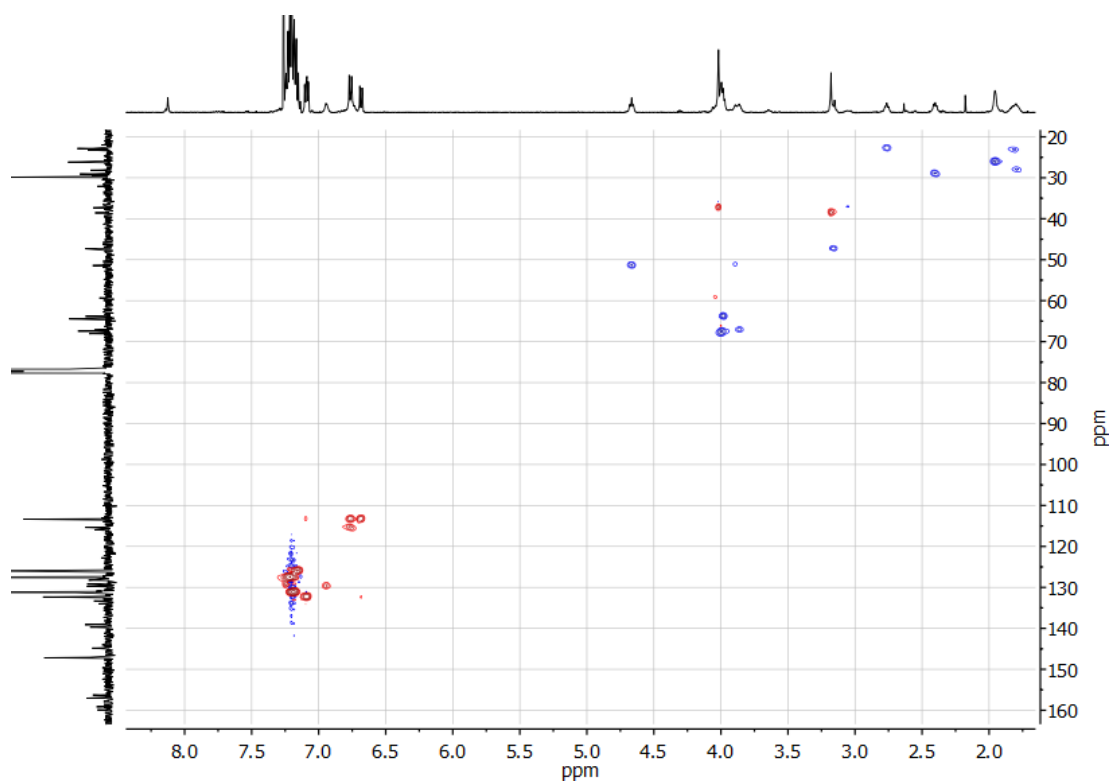

**Figure S45:** HSQC NMR (500 MHz and 126 MHz, CDCl<sub>3</sub>) spectrum of **2-H<sup>+</sup>·2PF<sub>6</sub><sup>-</sup>**.

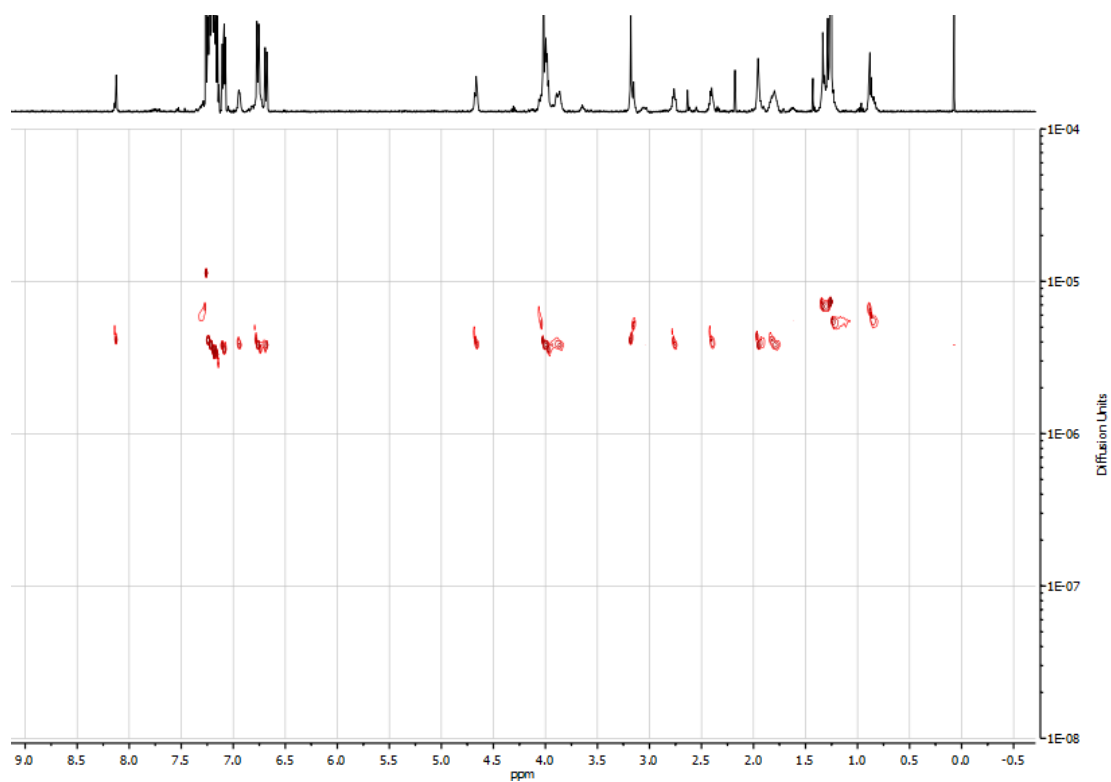

**Figure S46:** DOSY NMR (500 MHz, CDCl<sub>3</sub>) spectrum of **2-H<sup>+</sup>·2PF<sub>6</sub><sup>-</sup>**.



**Compound 13-H<sup>+</sup>·PF<sub>6</sub><sup>-</sup>:**

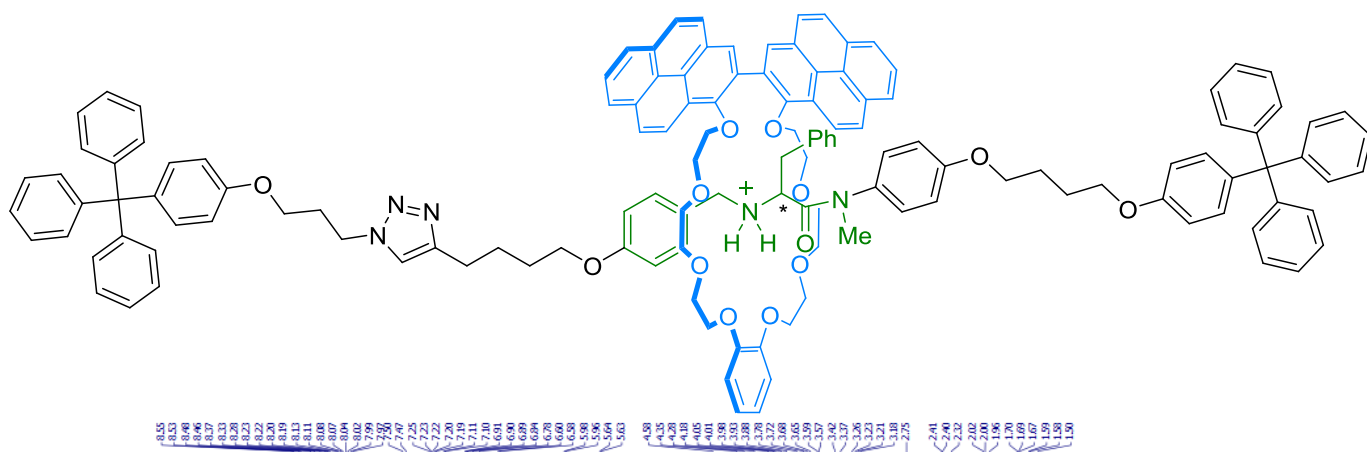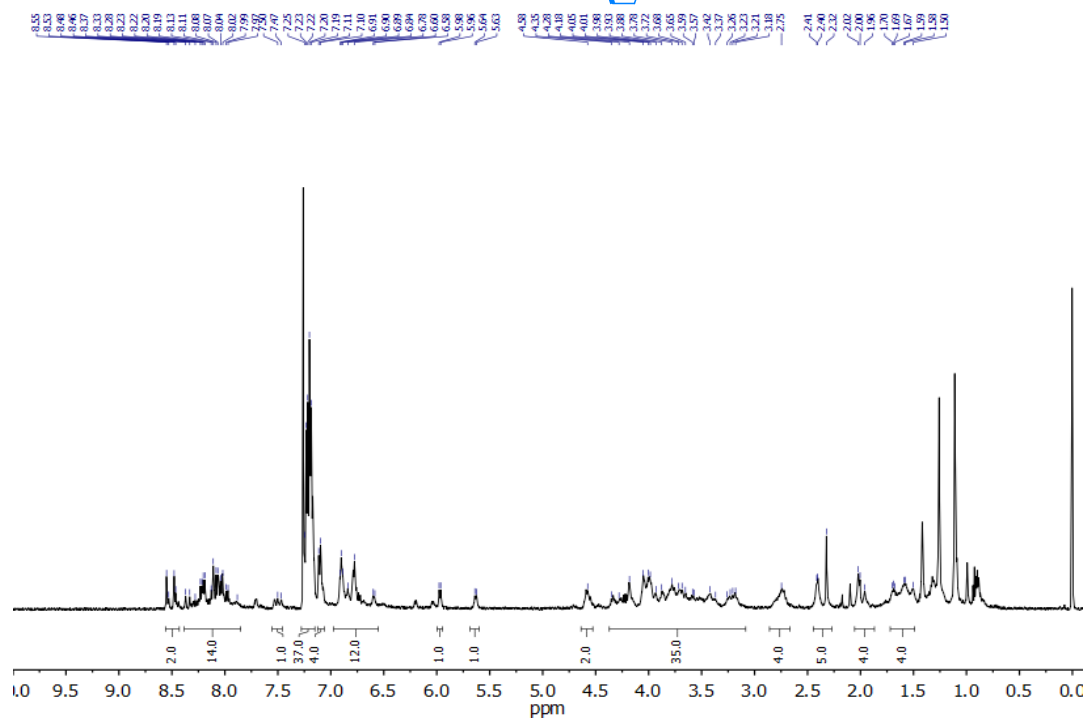

**Figure S47:** <sup>1</sup>H NMR (500 MHz, CDCl<sub>3</sub>) spectrum of 13-H<sup>+</sup>·PF<sub>6</sub><sup>-</sup>.

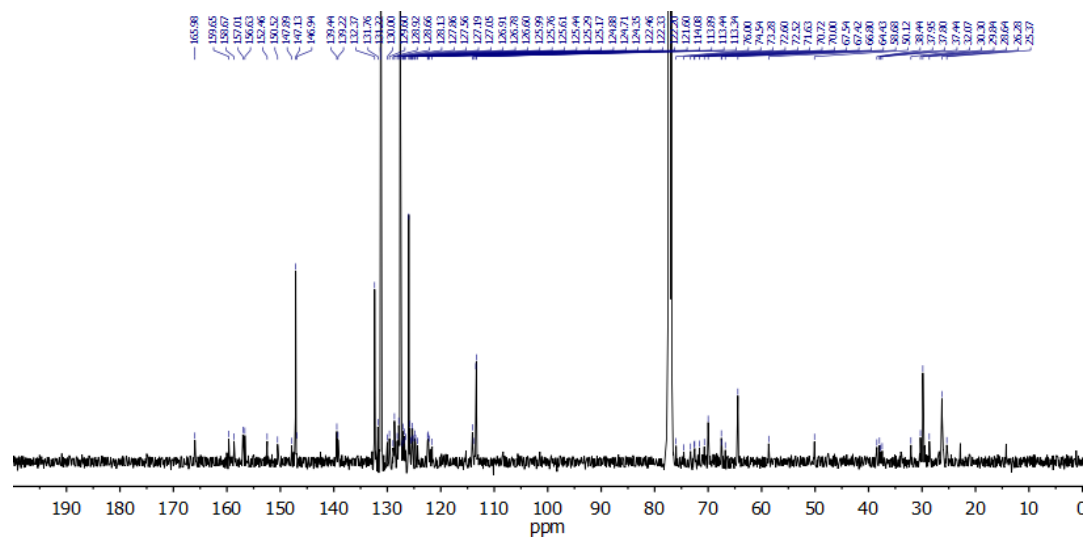

**Figure S48:** <sup>13</sup>C NMR (126 MHz, CDCl<sub>3</sub>) spectrum of 13-H<sup>+</sup>·PF<sub>6</sub><sup>-</sup>.

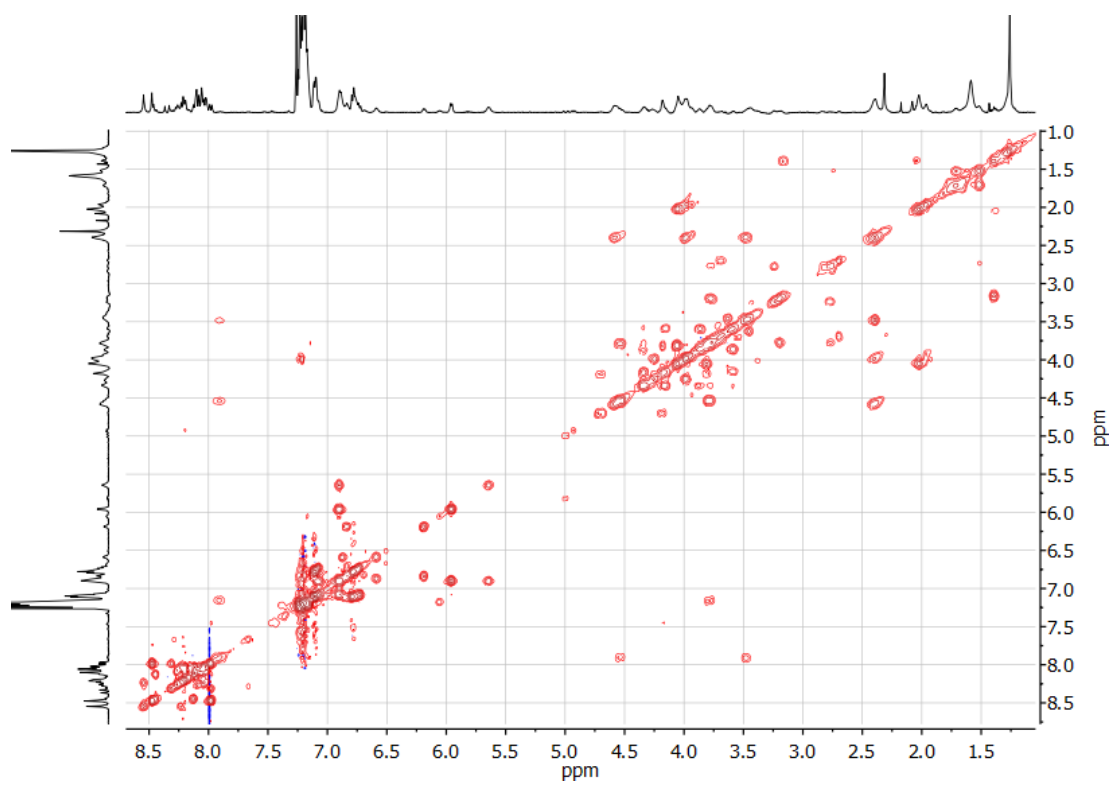

**Figure S49:** COSY NMR (500 MHz, CDCl<sub>3</sub>) spectrum of **13-H<sup>+</sup>·PF<sub>6</sub><sup>-</sup>**.

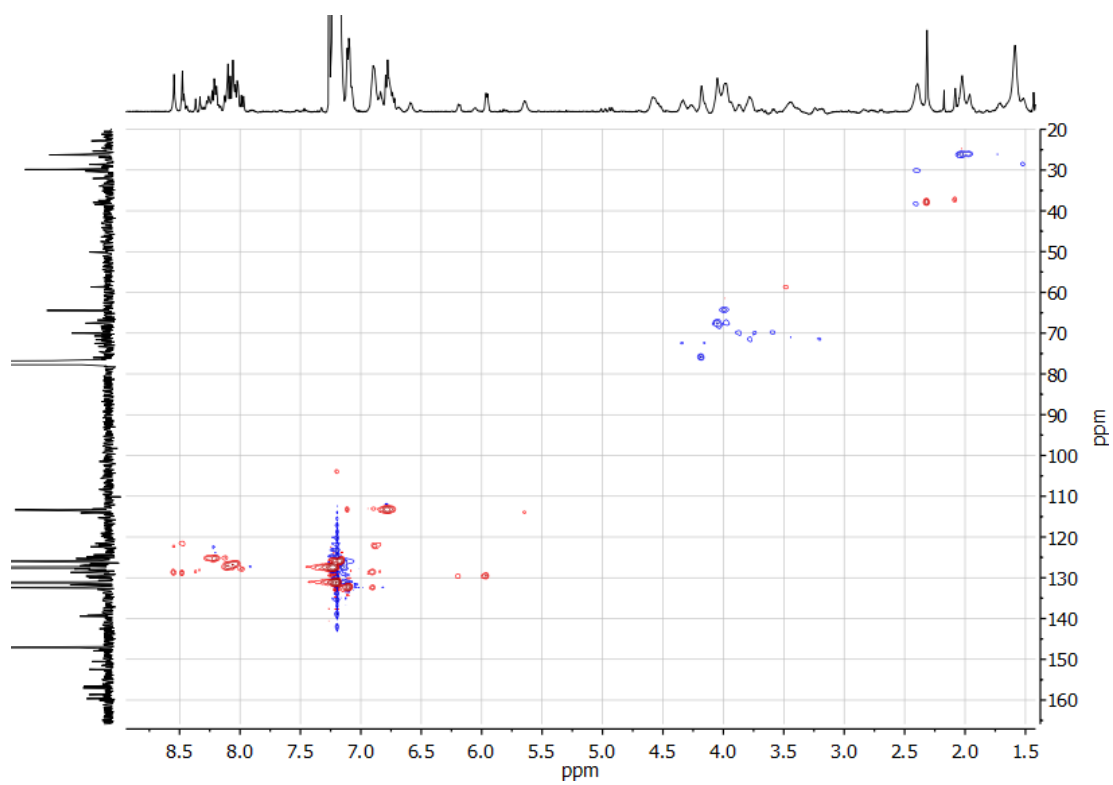

**Figure S50:** HSQC NMR (500 MHz and 126 MHz, CDCl<sub>3</sub>) spectrum of **13-H<sup>+</sup>·PF<sub>6</sub><sup>-</sup>**.

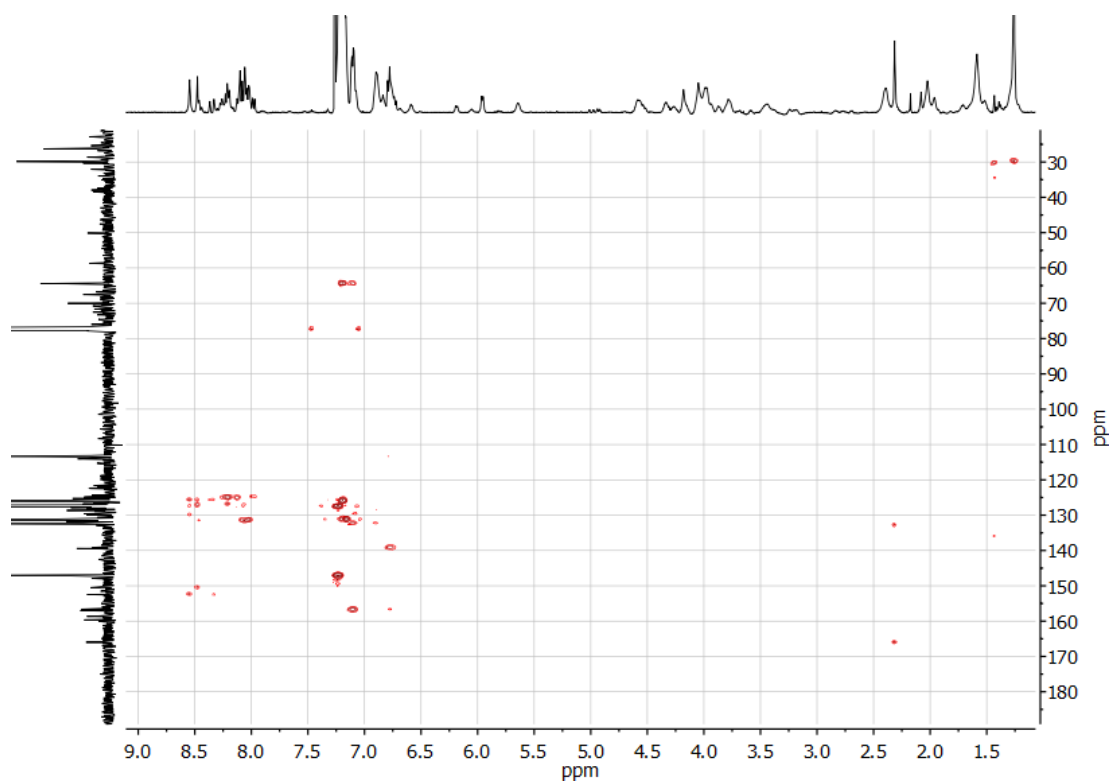

**Figure S51:** HMBC NMR (500 MHz and 126 MHz, CDCl<sub>3</sub>) spectrum of **13-H<sup>+</sup>·PF<sub>6</sub><sup>-</sup>**.

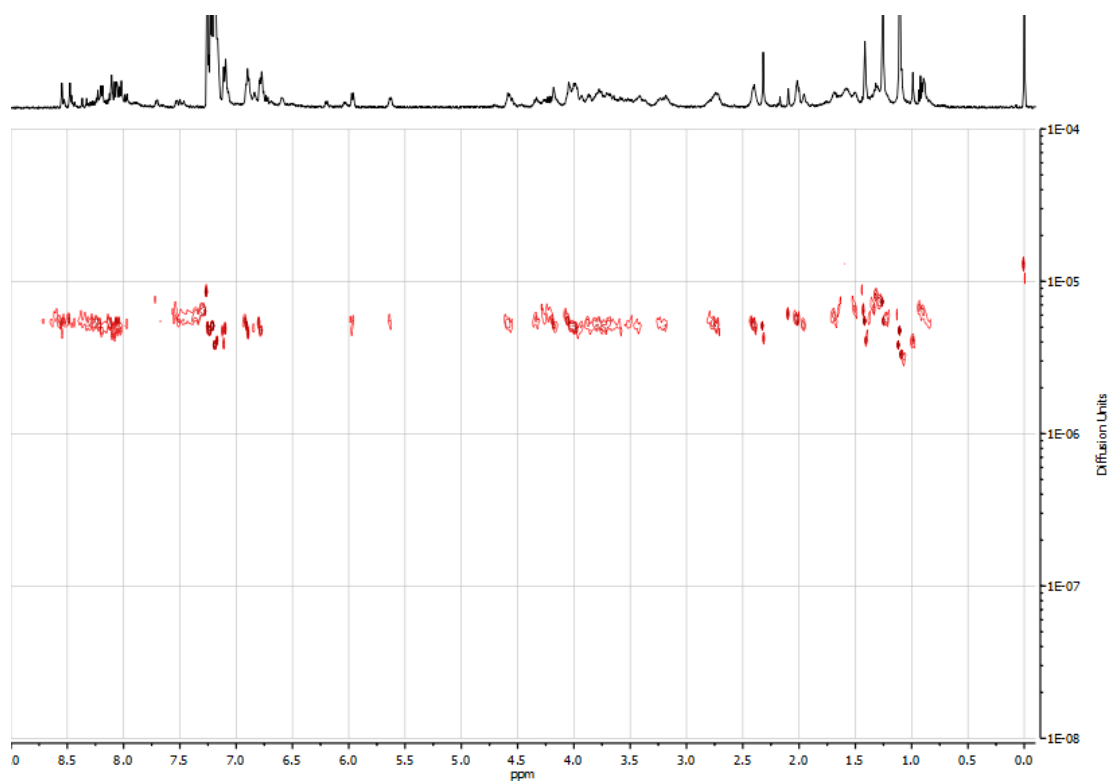

**Figure S52:** DOSY NMR (500 MHz, CDCl<sub>3</sub>) spectrum of **13-H<sup>+</sup>·PF<sub>6</sub><sup>-</sup>**.

**Compound 1-H<sup>+</sup>·2PF<sub>6</sub><sup>-</sup>:**

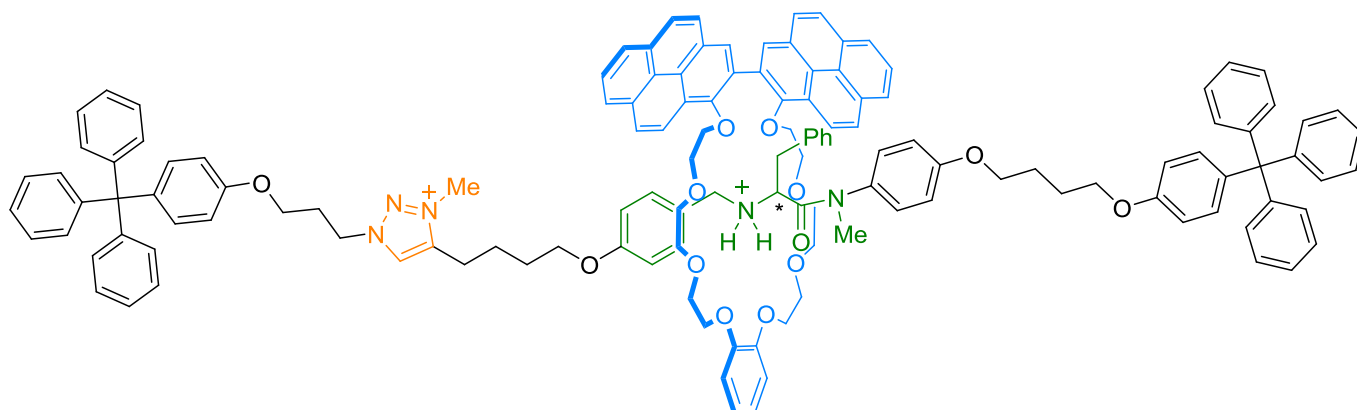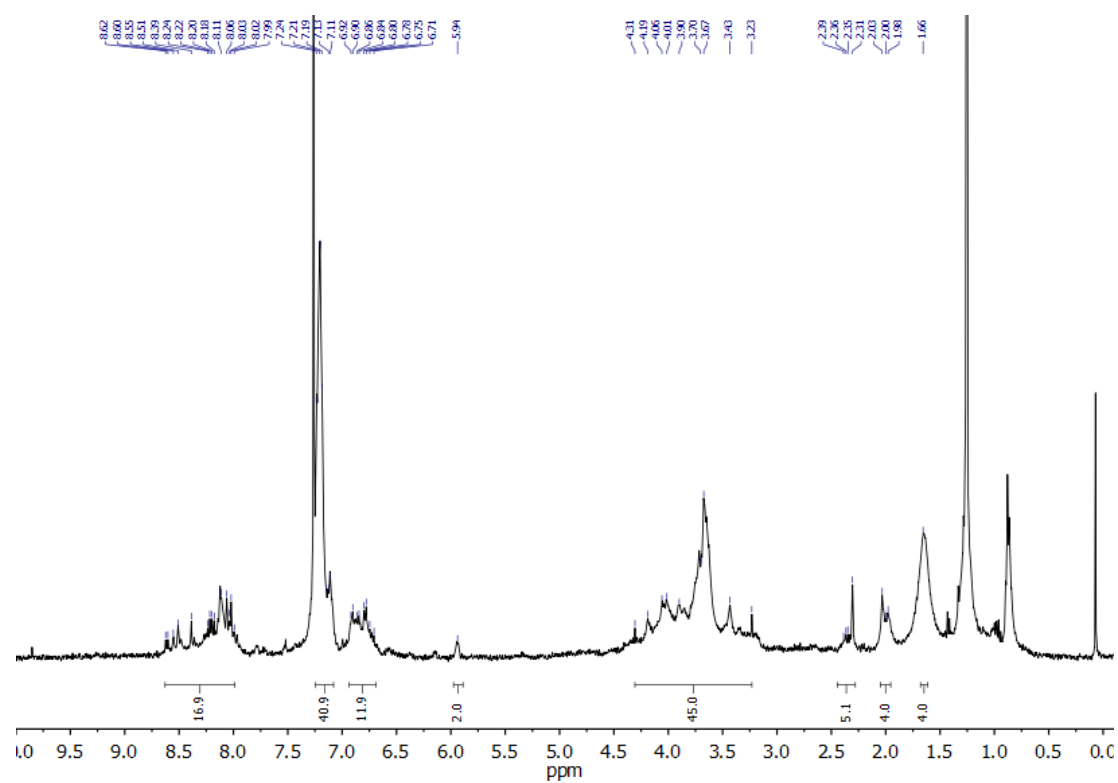

**Figure S53:** <sup>1</sup>H NMR (400 MHz, CDCl<sub>3</sub>) spectrum of 1-H<sup>+</sup>·2PF<sub>6</sub><sup>-</sup>.

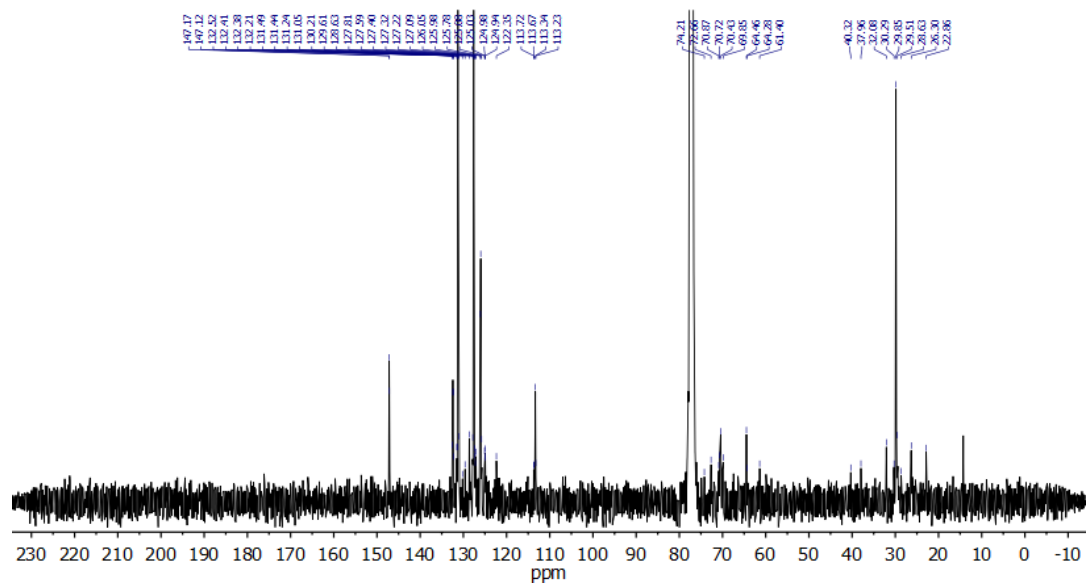

**Figure S54:**  $^{13}\text{C}$  NMR (126 MHz,  $\text{CDCl}_3$ ) spectrum of  $1\text{-H}^+\cdot 2\text{PF}_6^-$ .

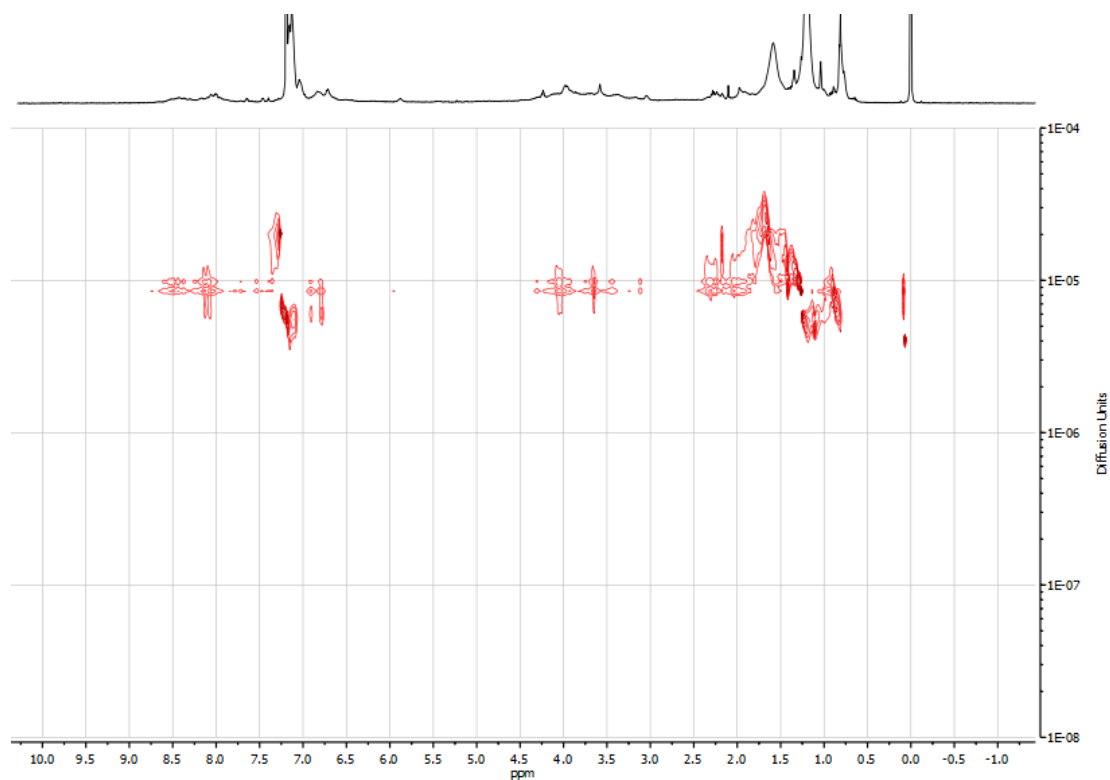

**Figure S55:** DOSY NMR (500 MHz,  $\text{CDCl}_3$ ) spectrum of  $1\text{-H}^+\cdot 2\text{PF}_6^-$ .

**Compound 1·PF<sub>6</sub><sup>-</sup>:**

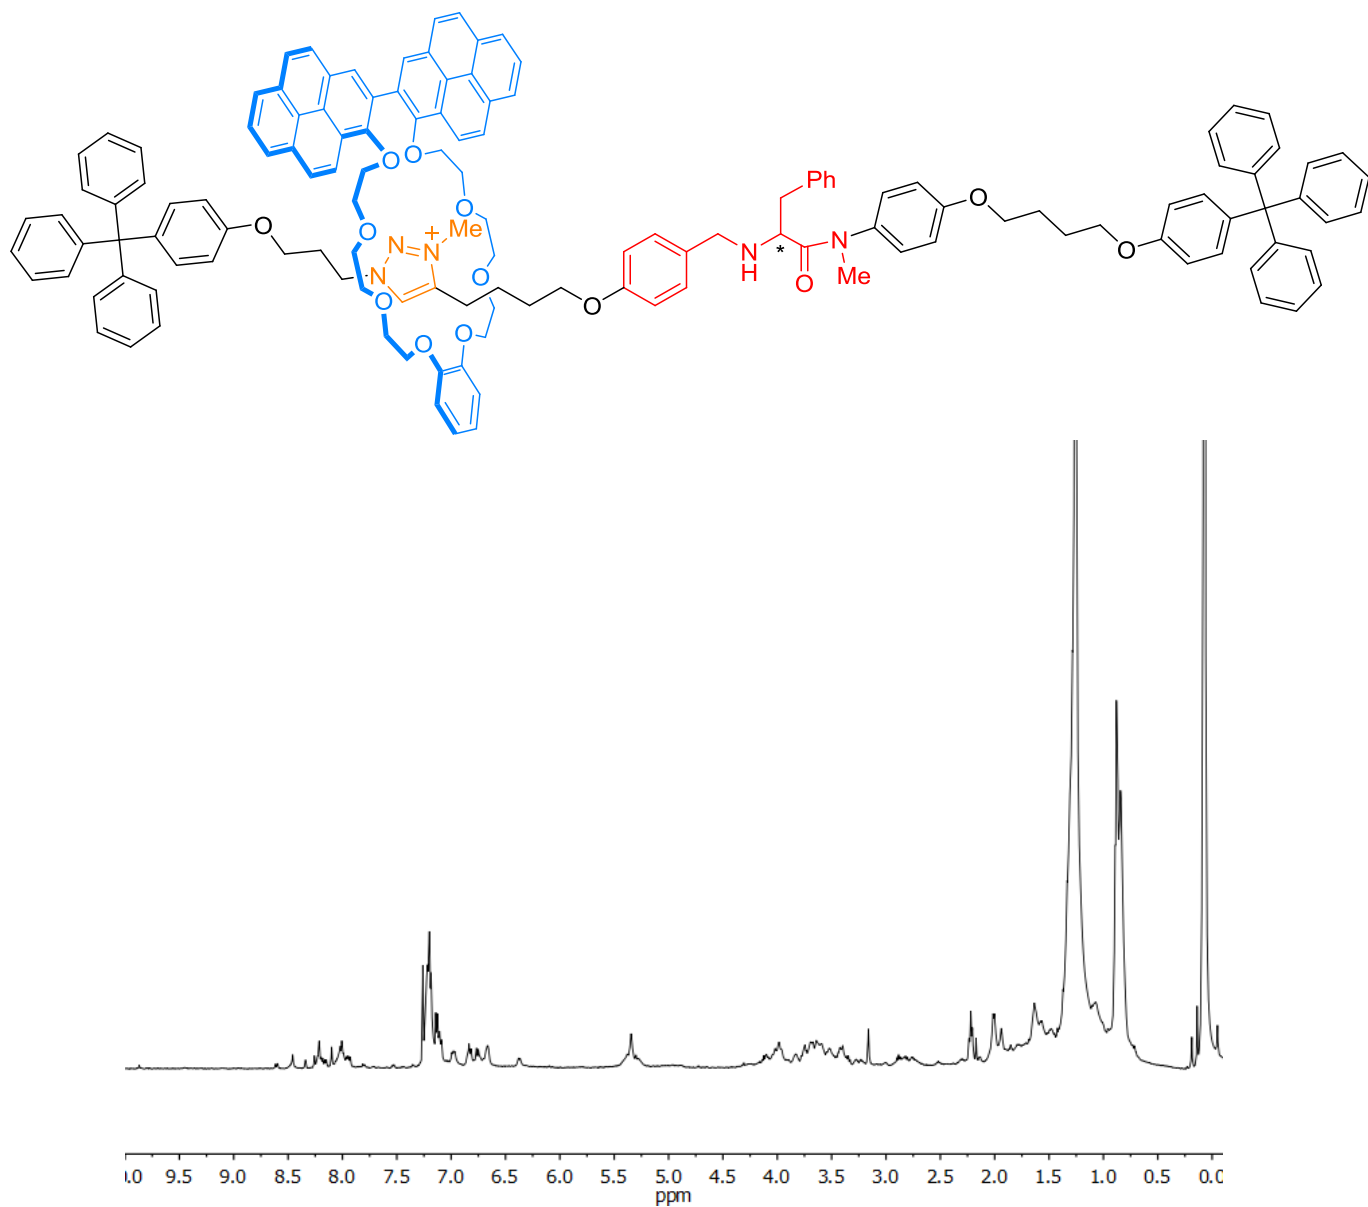

**Figure S56:** <sup>1</sup>H NMR (500 MHz, CDCl<sub>3</sub>) spectrum of **1**·PF<sub>6</sub><sup>-</sup>.

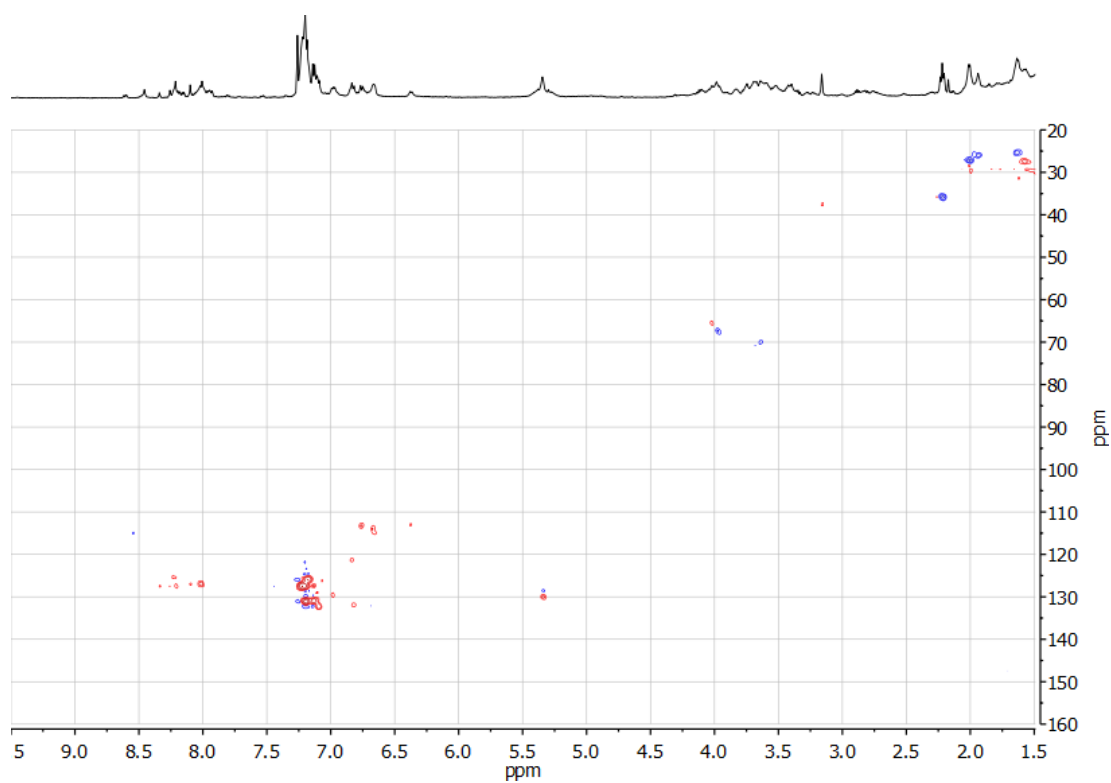

**Figure S57:** HSQC NMR (500 MHz and 126 MHz,  $\text{CDCl}_3$ ) spectrum of  $\mathbf{1} \cdot \text{PF}_6^-$ .

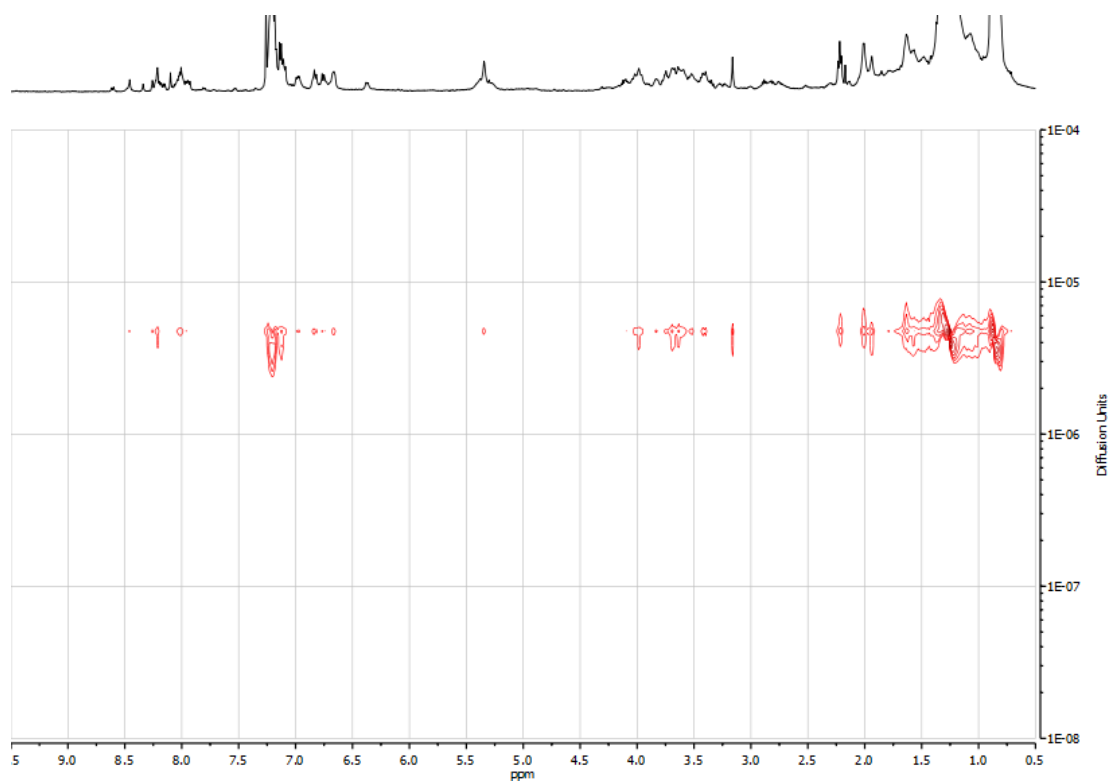

**Figure S58:** DOSY NMR (500 MHz,  $\text{CDCl}_3$ ) spectrum of  $\mathbf{1} \cdot \text{PF}_6^-$ .

## 4. HRMS spectra of rotaxanes

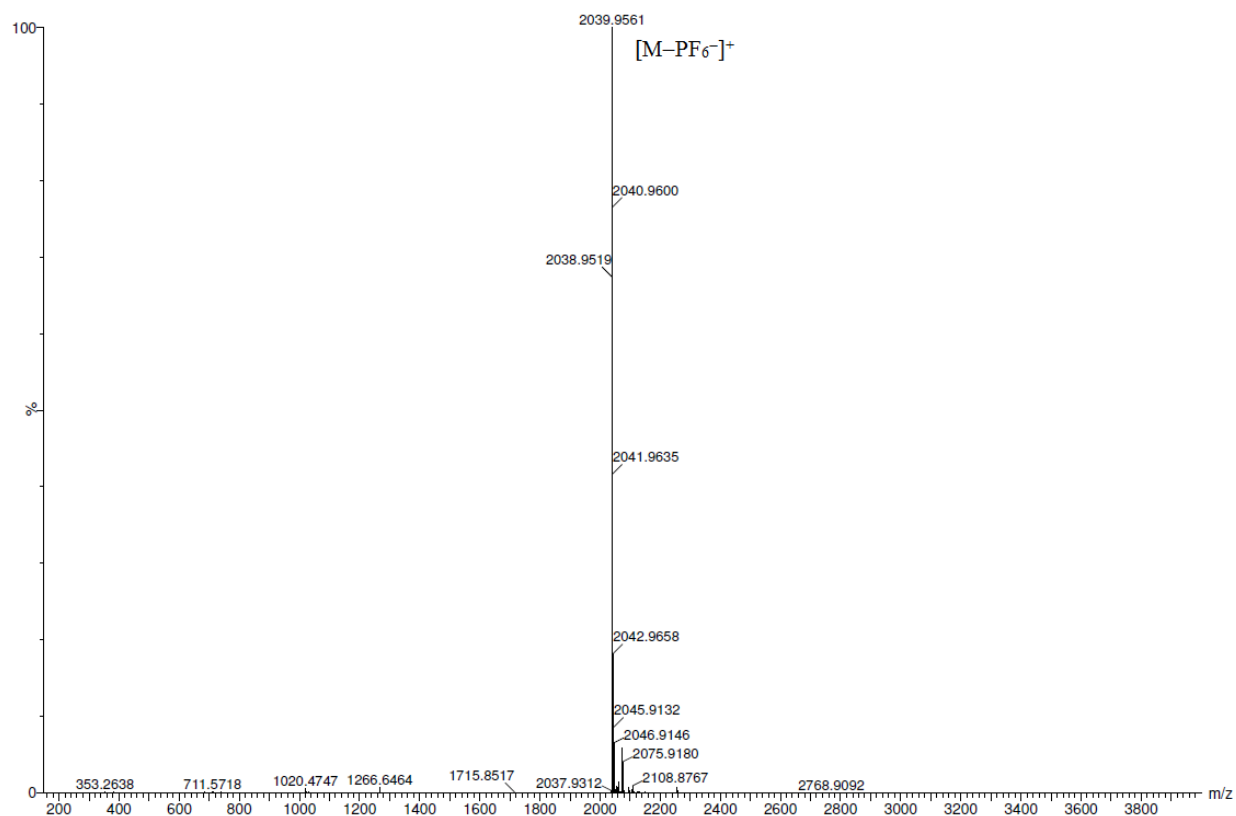

**Figure S59:** HRMS (ESI<sup>+</sup>) spectrum of **13-H<sup>+</sup>·PF<sub>6</sub><sup>-</sup>**.

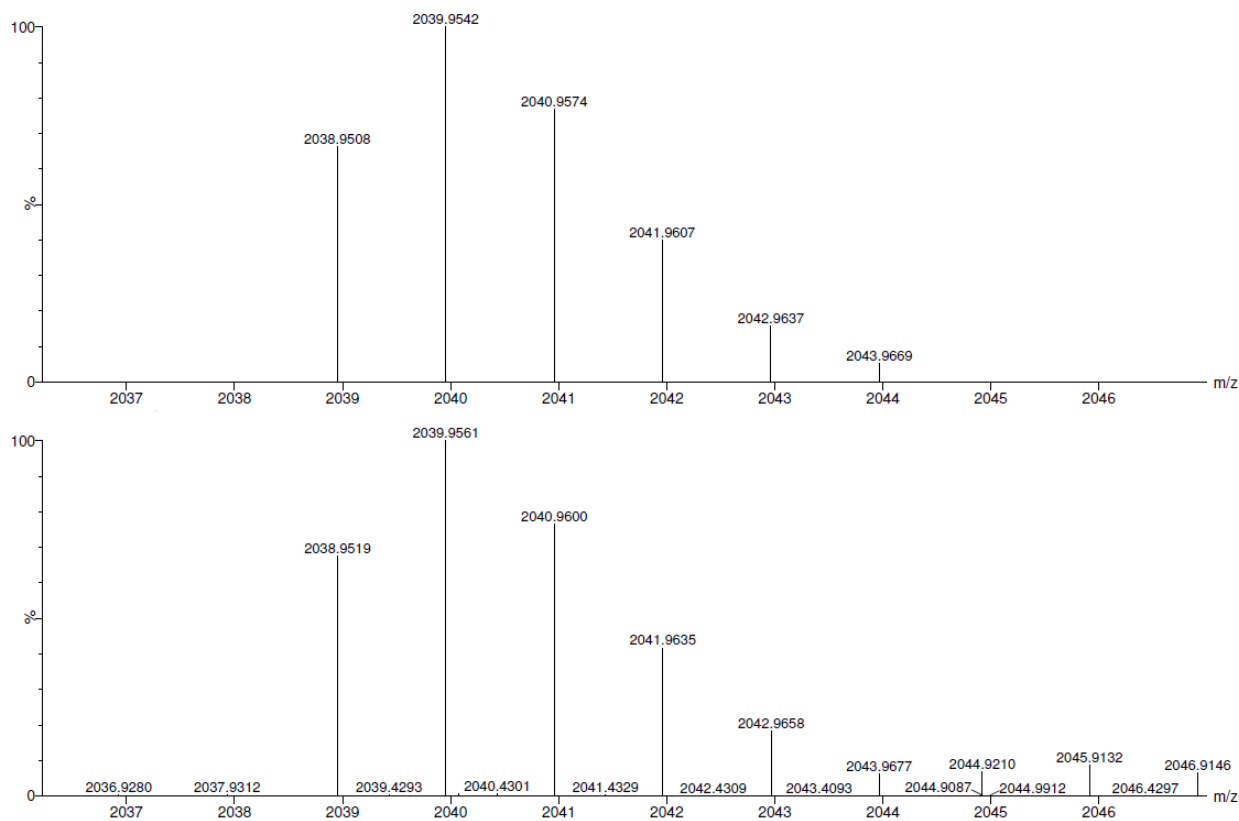

**Figure S60:** Observed (bottom) and calculated (top) isotopic distribution for **[13-PF<sub>6</sub>]<sup>+</sup>**.



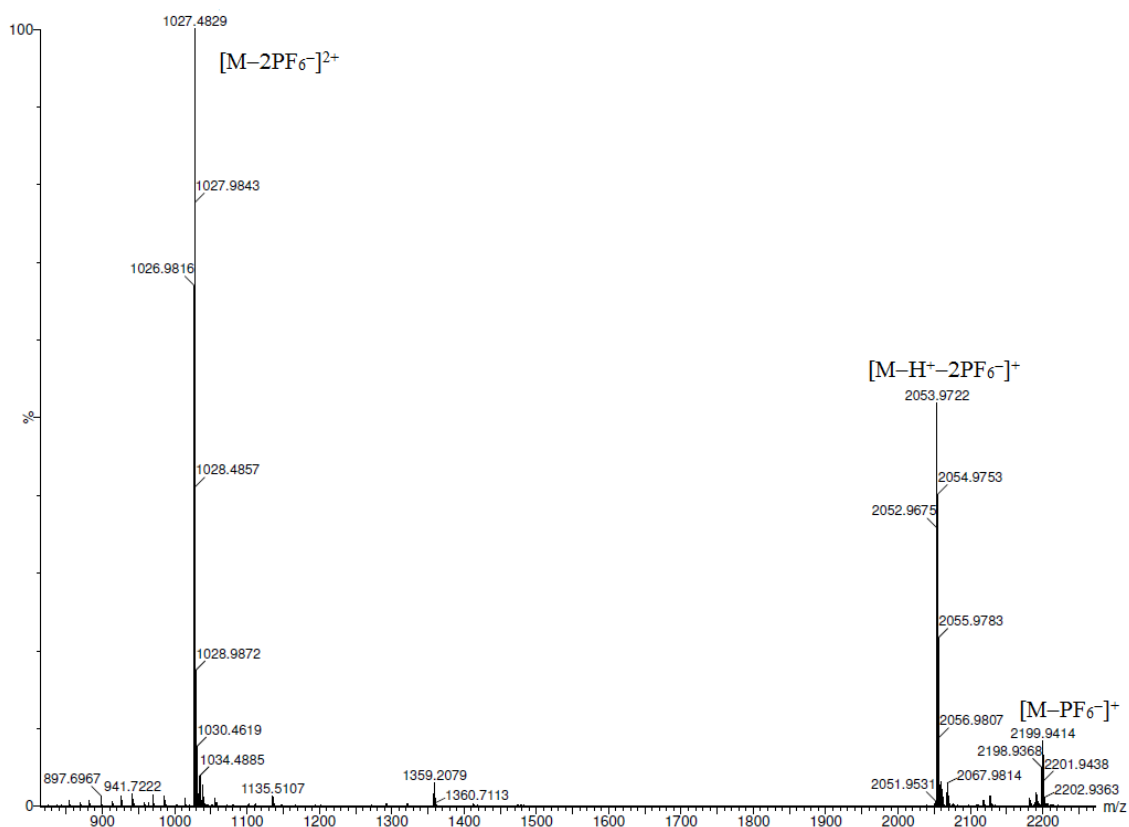

**Figure S61:** HRMS (ESI<sup>+</sup>) spectrum of  $1\text{-H}^+\cdot 2\text{PF}_6^-$ .

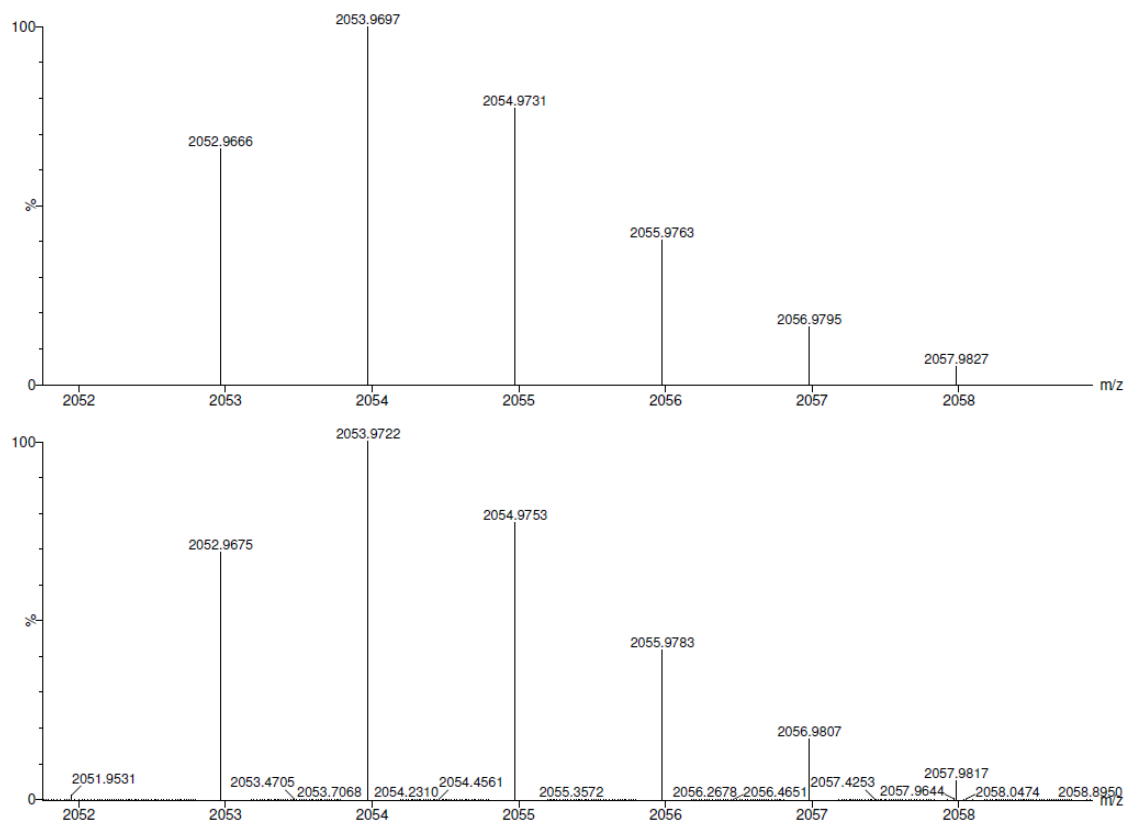

**Figure S62:** Observed (bottom) and calculated (top) isotopic distribution for  $[1\text{-H}^+ - 2\text{PF}_6^-]^+$ .

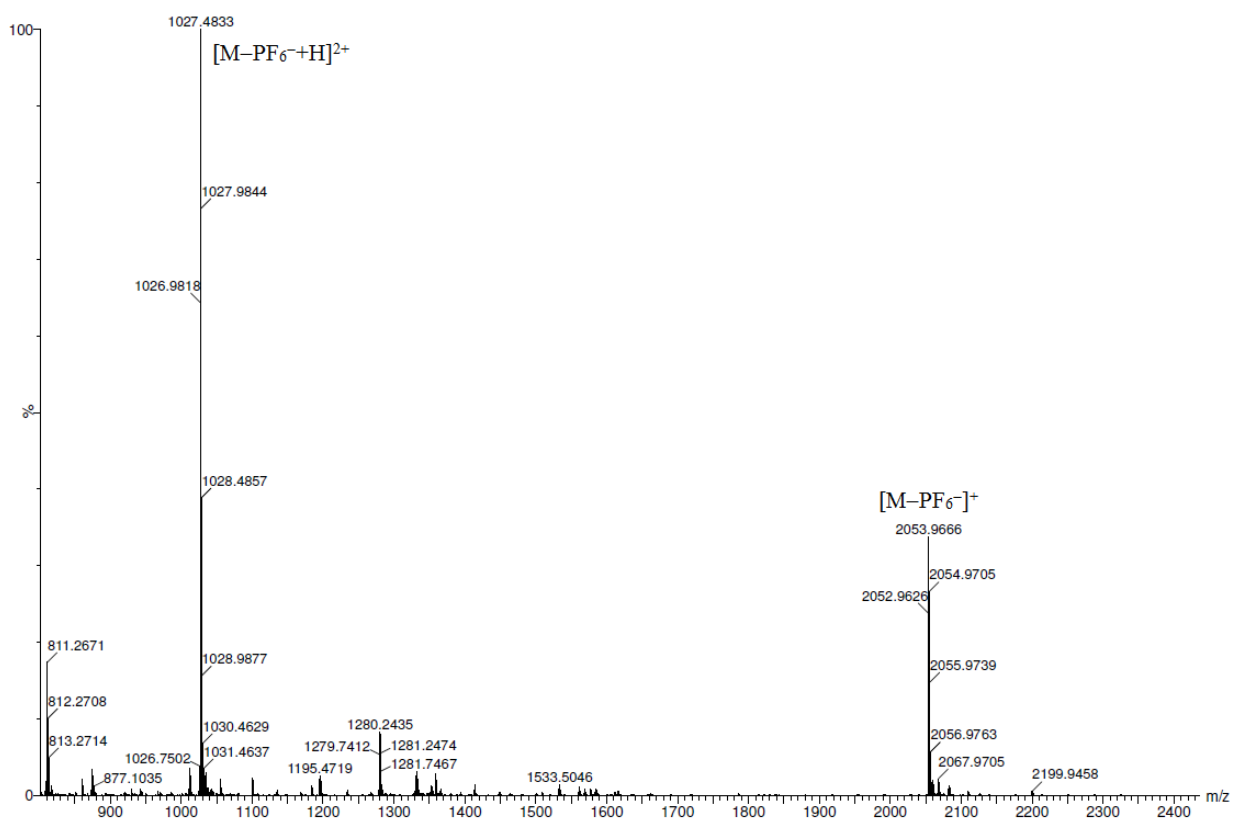

**Figure S63:** HRMS (ESI<sup>+</sup>) spectrum of **1**·PF<sub>6</sub><sup>-</sup> used for the OFF state CPL measurement, showing peaks corresponding to:  $m/z$ : 2052.9626 [M-PF<sub>6</sub>]<sup>+</sup> (calcd for C<sub>137</sub>H<sub>130</sub>N<sub>5</sub>O<sub>13</sub>: 2052.9665); 1026.9818 [M+H-PF<sub>6</sub>]<sup>2+</sup> (calcd for [C<sub>137</sub>H<sub>131</sub>N<sub>5</sub>O<sub>13</sub>]<sup>2+</sup>: 1026.9872).

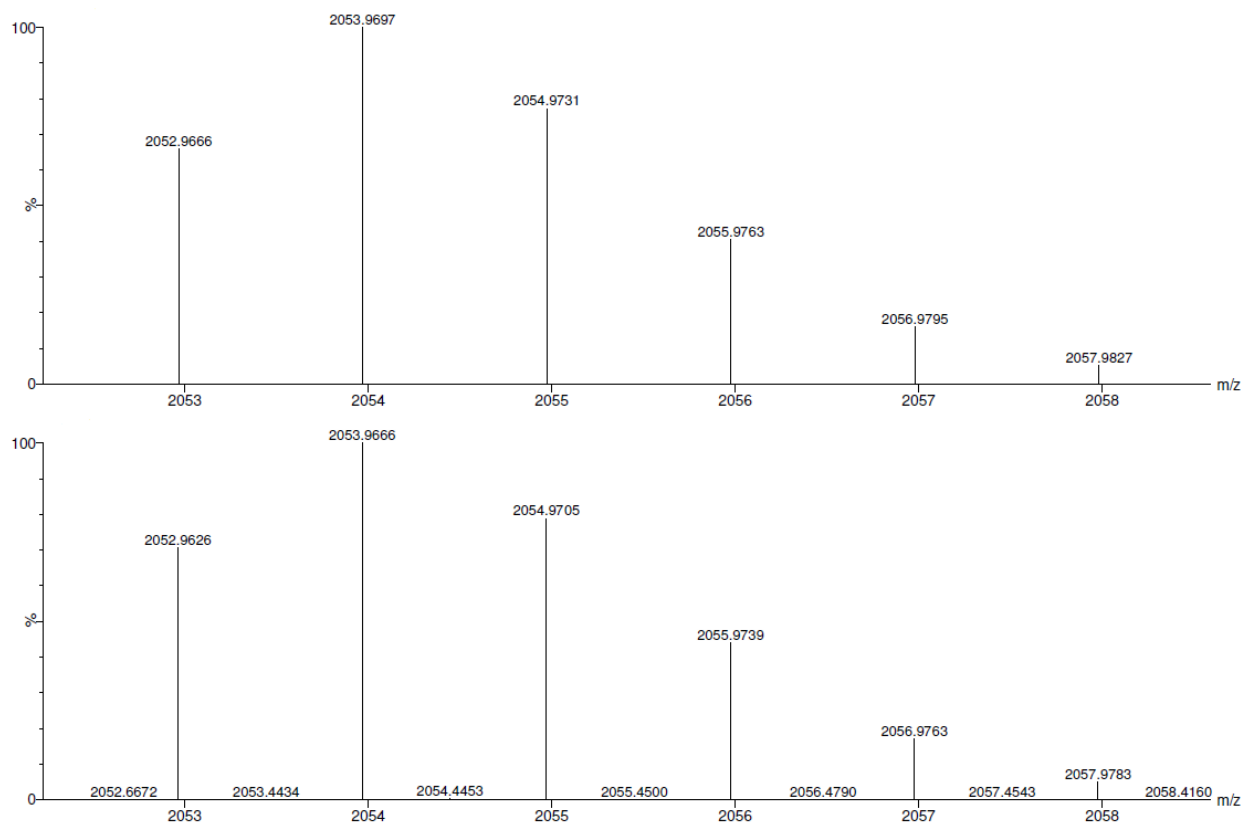

**Figure S64:** Observed (bottom) and calculated (top) isotopic distribution for [1-PF<sub>6</sub>]<sup>+</sup>.

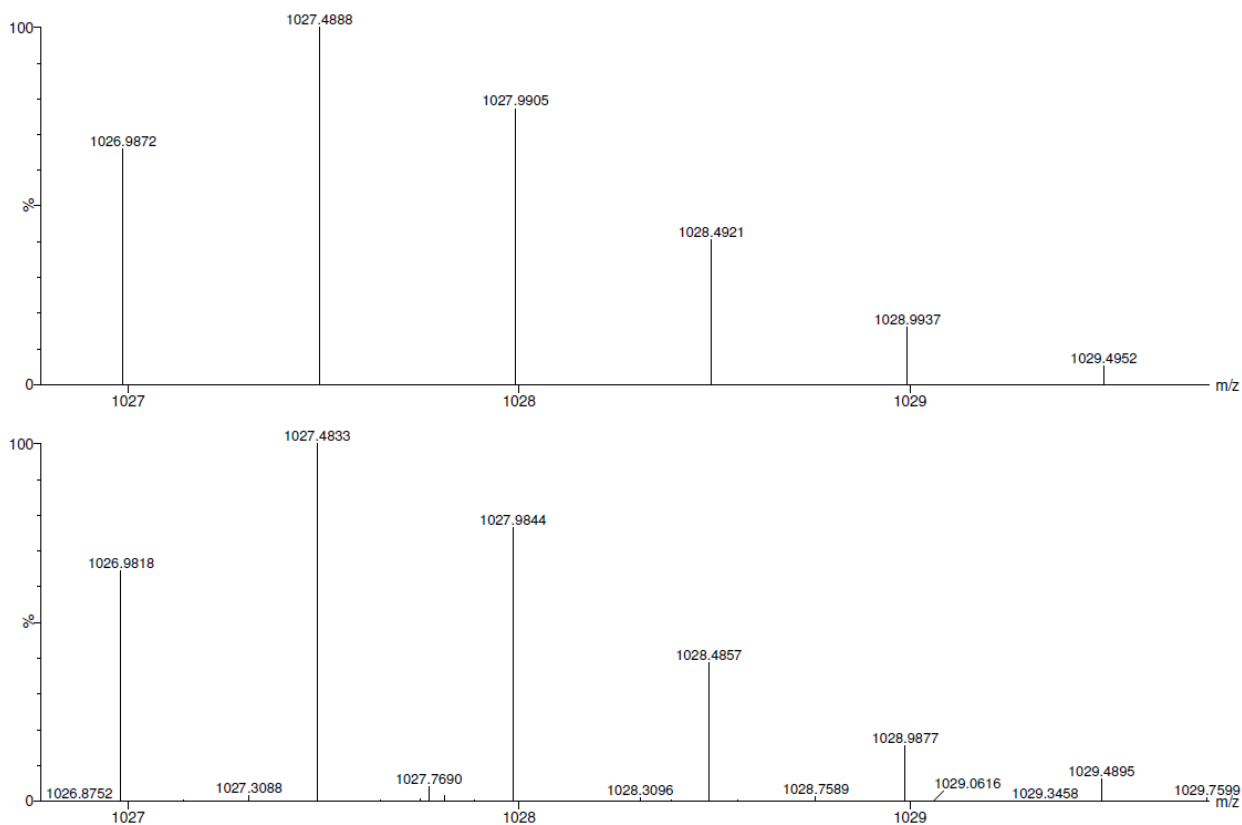

**Figure S65:** Observed (bottom) and calculated (top) isotopic distribution for  $[1\text{-PF}_6^- + \text{H}]^{2+}$ .

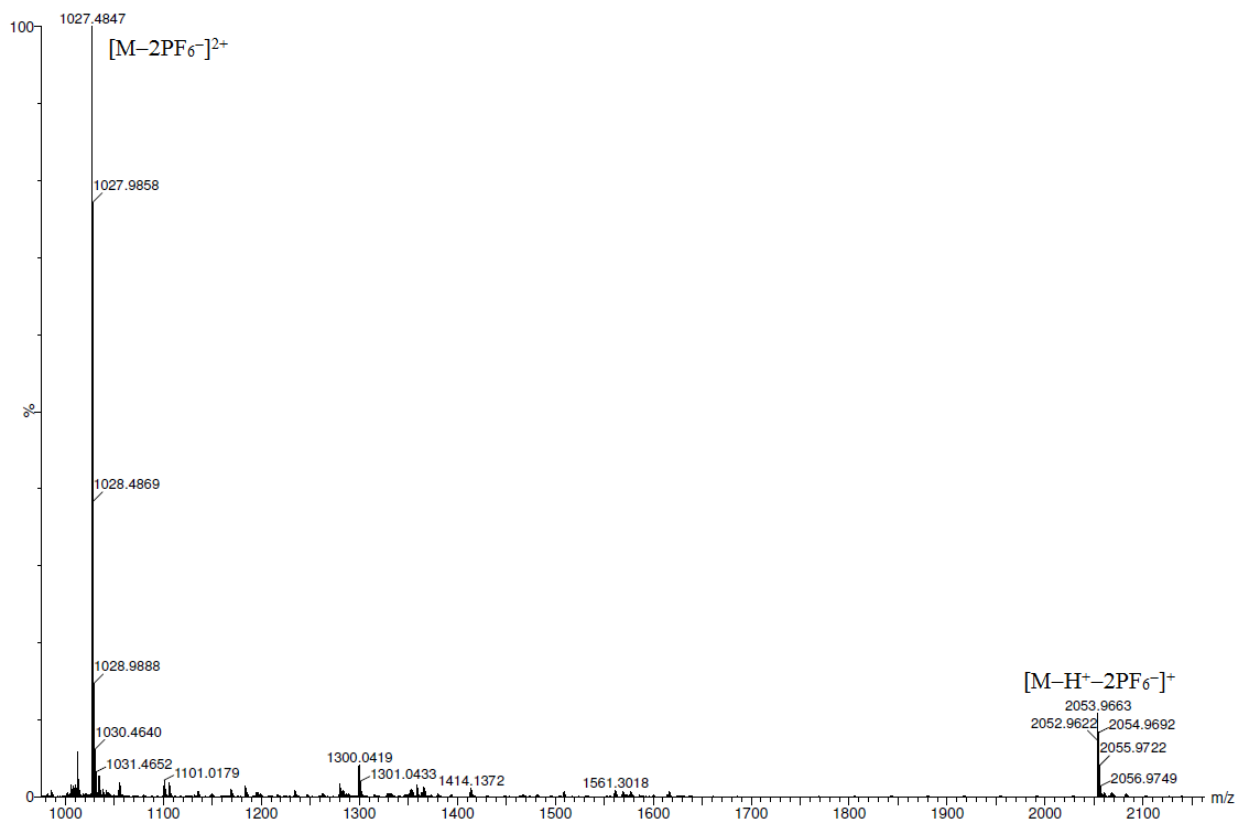

**Figure S66:** HRMS (ESI<sup>+</sup>) spectrum of  $1\text{-H}^+$  used for the second cycle ON state CPL measurement, showing peaks corresponding to:  $m/z$ : 2052.9622  $[M\text{-H}^+ - 2\text{PF}_6^-]^+$  (calcd for  $\text{C}_{137}\text{H}_{130}\text{N}_5\text{O}_{13}$ : 2052.9665); 1026.9829  $[M - 2\text{PF}_6^-]^{2+}$  (calcd for  $[\text{C}_{137}\text{H}_{131}\text{N}_5\text{O}_{13}]^{2+}$ : 1026.9872).

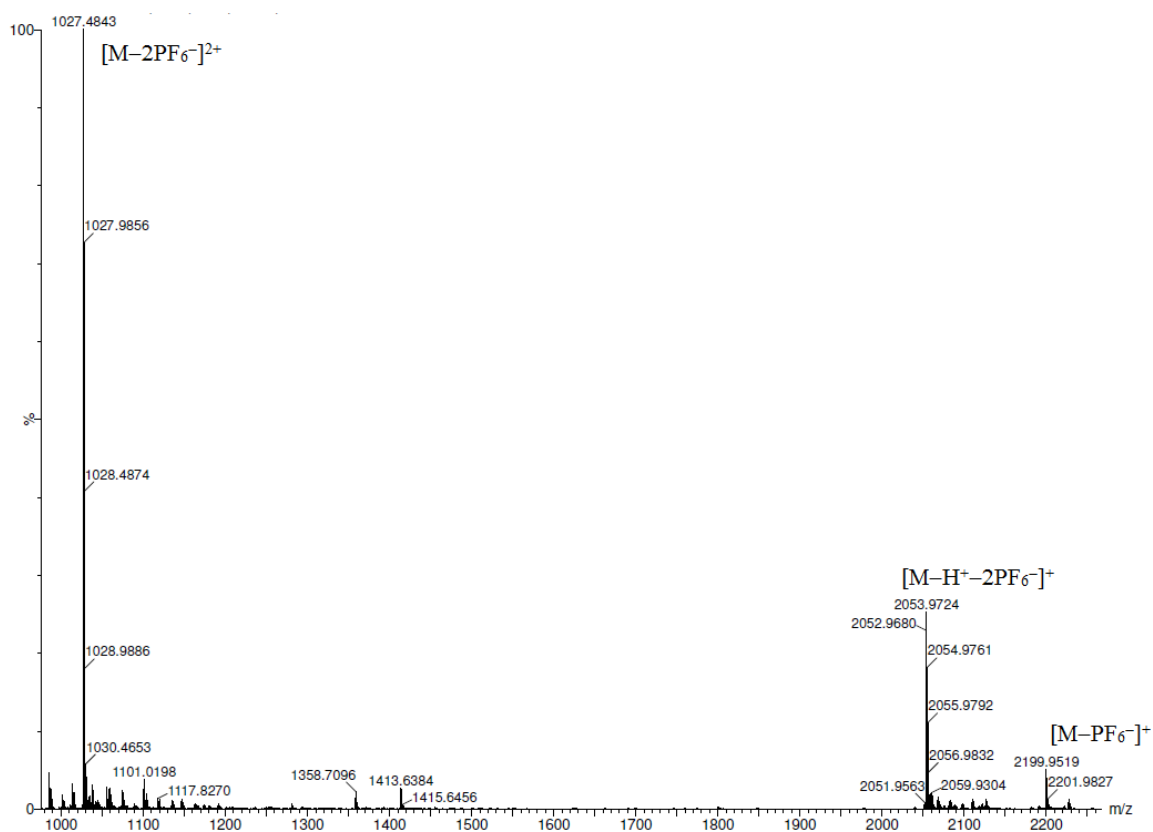

**Figure S67:** HRMS (ESI<sup>+</sup>) spectrum of **1**·H<sup>+</sup>·2PF<sub>6</sub><sup>-</sup> obtained by protonation of **1**·PF<sub>6</sub><sup>-</sup> with CF<sub>3</sub>CO<sub>2</sub>H and counterion exchange with KPF<sub>6</sub>, showing peaks corresponding to: *m/z*: 2052.9680 [M-H<sup>+</sup>-2PF<sub>6</sub><sup>-</sup>]<sup>+</sup> (calcd for C<sub>137</sub>H<sub>130</sub>N<sub>5</sub>O<sub>13</sub>: 2052.9665); 2198.9424 [M-PF<sub>6</sub><sup>-</sup>]<sup>+</sup> (calcd for [C<sub>137</sub>H<sub>131</sub>N<sub>5</sub>O<sub>13</sub>PF<sub>6</sub>]<sup>+</sup>: 2198.9385).

## 5. HPLC traces

HPLC experiments were carried out using an HPLC Agilent 1200 Infinity Series with a LiChroCART® 250-4 LiChrospher® 100 RP-8 (5 µm) analytical column. The column temperature was set at 20.0 °C. The wavelength selected for the peak detection was 280 nm and the flow was constant during the operation: 1.000 mL/min. The mobile phase gradient used is shown in Table S1.

**Table S1:** Solvent gradient used for the HPLC analysis.

| Time (min) | CH <sub>2</sub> Cl <sub>2</sub> | Methanol |
|------------|---------------------------------|----------|
| 0          | 100                             | 0        |
| 15         | 99                              | 1        |
| 20         | 98                              | 2        |
| 25         | 96                              | 4        |
| 30         | 95                              | 5        |
| 35         | 92                              | 8        |
| 40         | 90                              | 10       |
| 43         | 85                              | 15       |
| 47         | 93                              | 7        |
| 50         | 100                             | 0        |

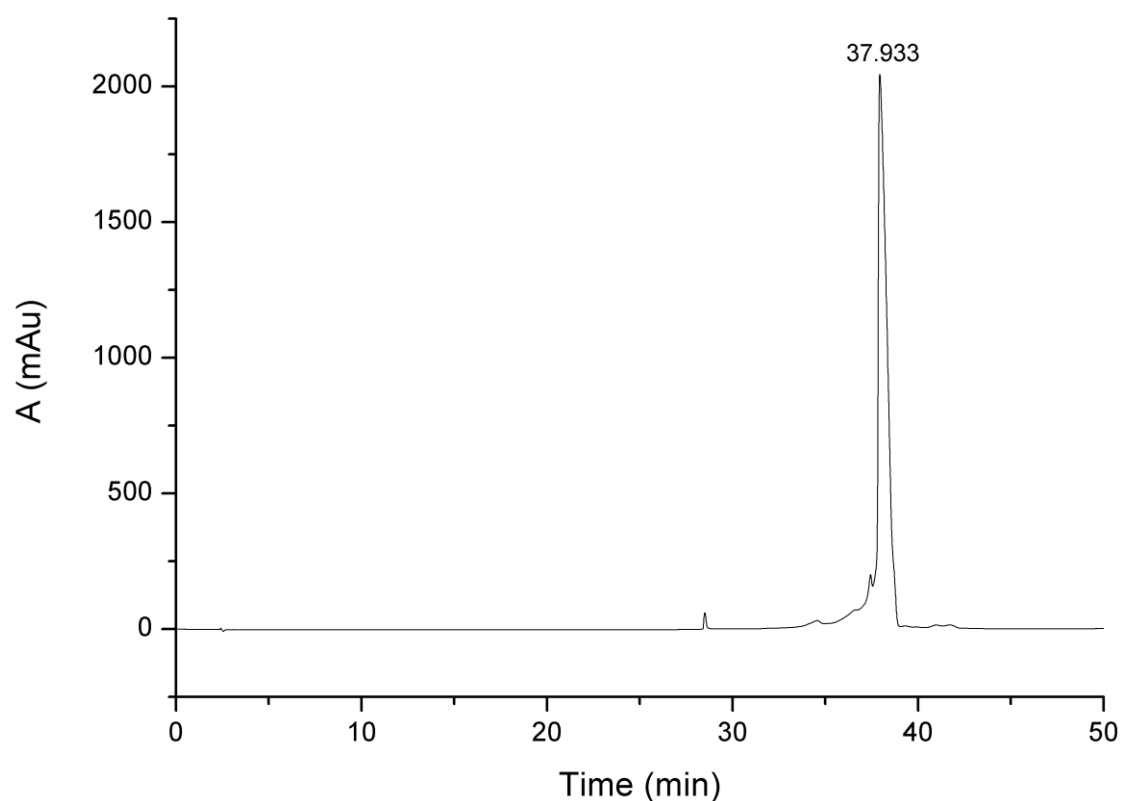

**Figure S68:** HPLC chromatogram of **8**.

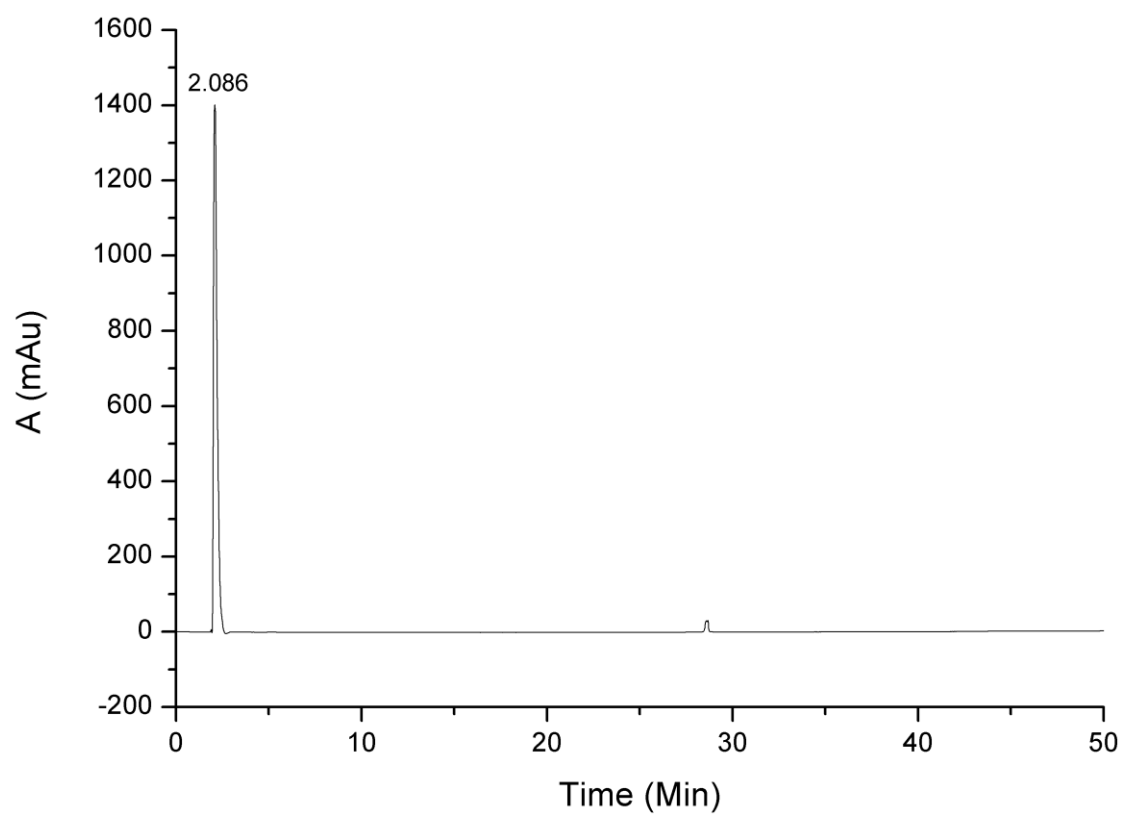

**Figure S69:** HPLC chromatogram of **12**.

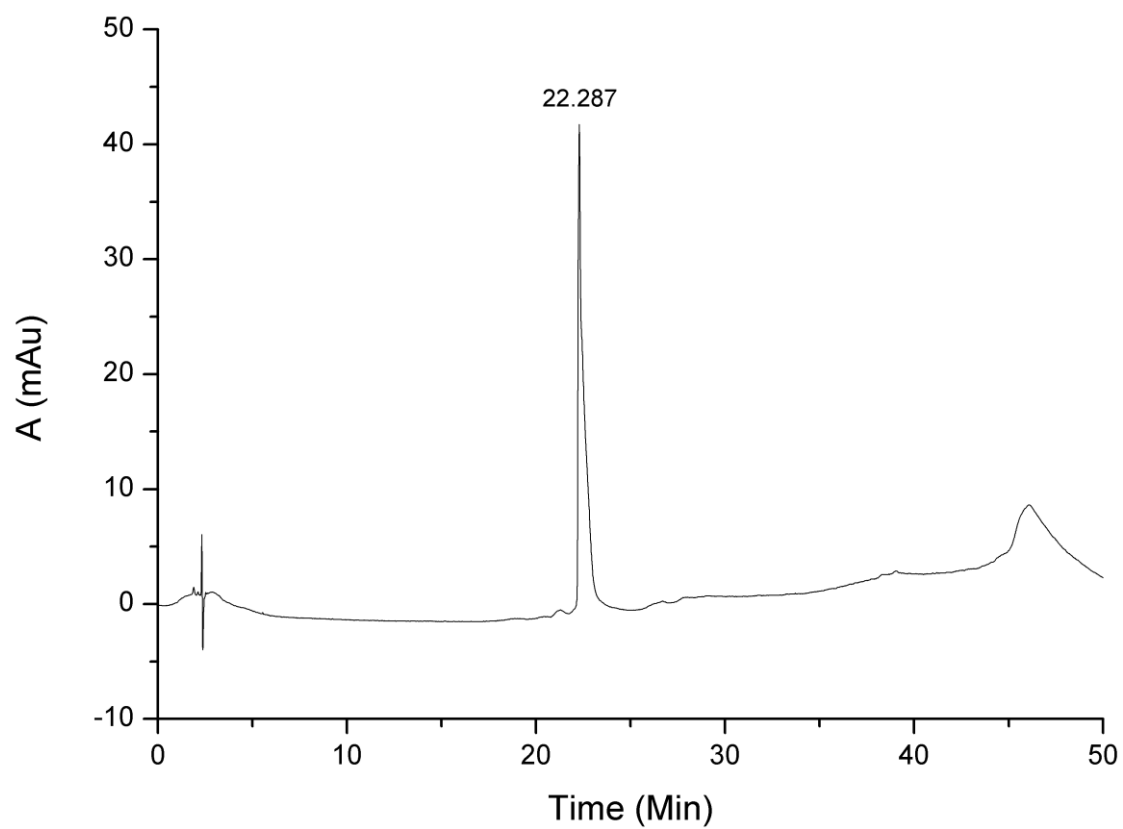

**Figure S70:** HPLC chromatogram of **11-H<sup>+</sup>·PF<sub>6</sub><sup>-</sup>**.

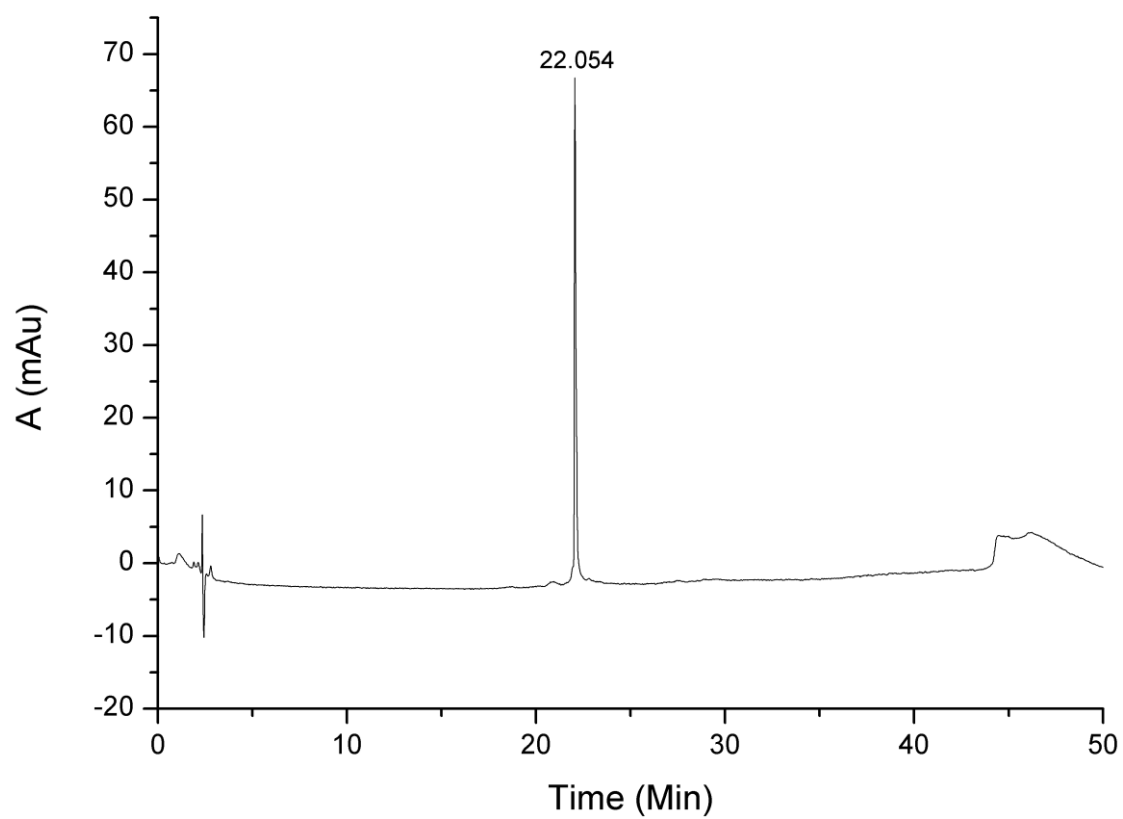

**Figure S71:** HPLC chromatogram of  $14\text{-H}^+\cdot\text{PF}_6^-$ .

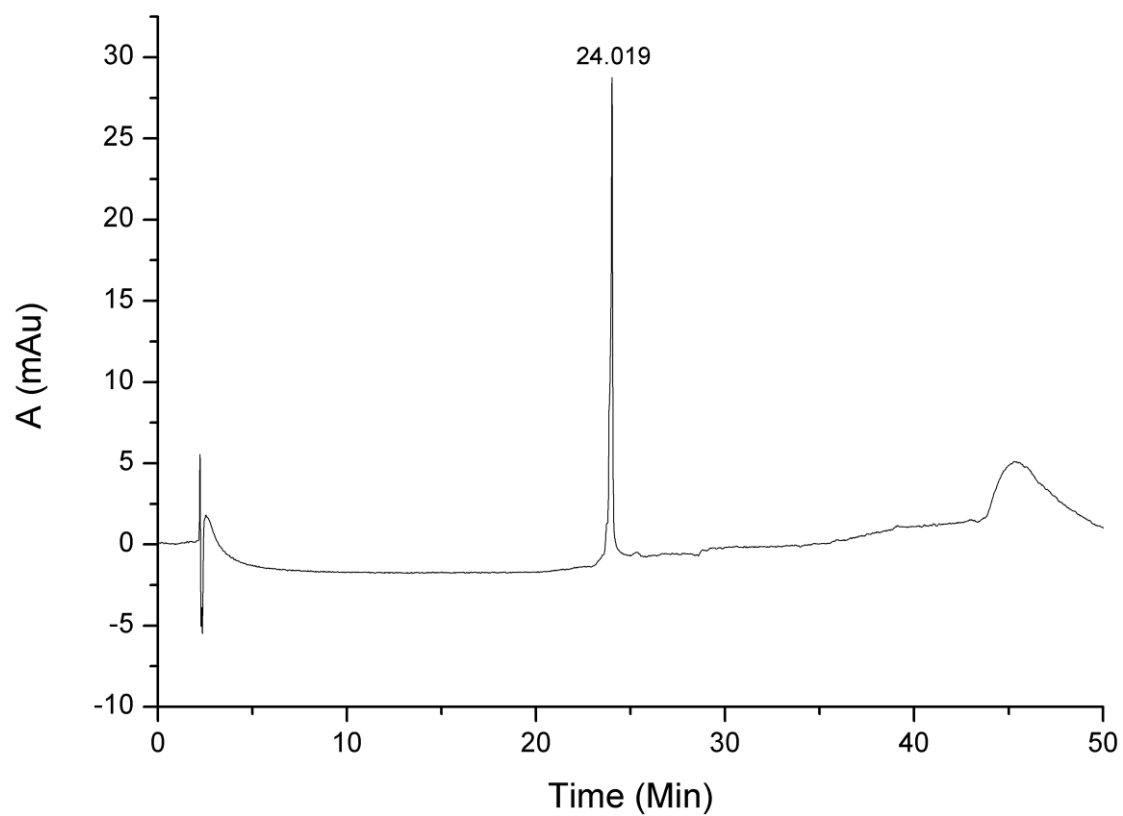

**Figure S72:** HPLC chromatogram of  $2\text{-H}^+\cdot 2\text{PF}_6^-$ .

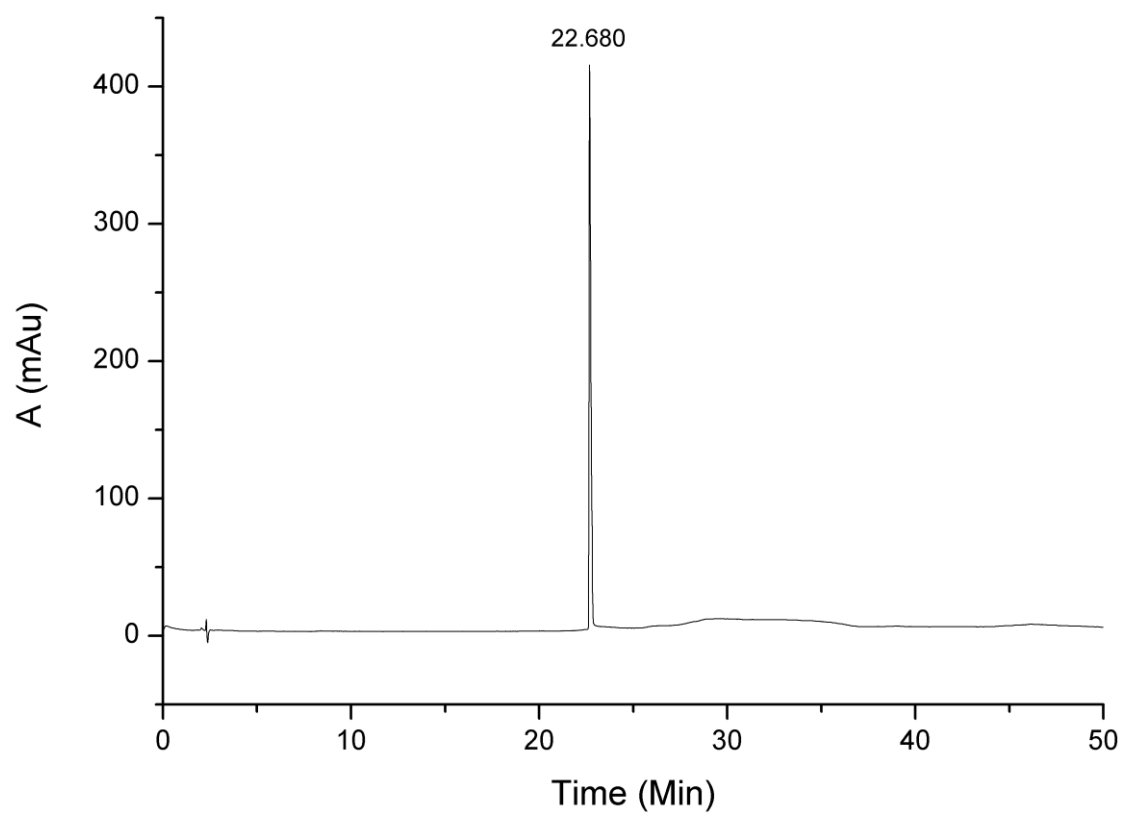

**Figure S73:** HPLC chromatogram of  $13\text{-H}^+\cdot\text{PF}_6^-$ .

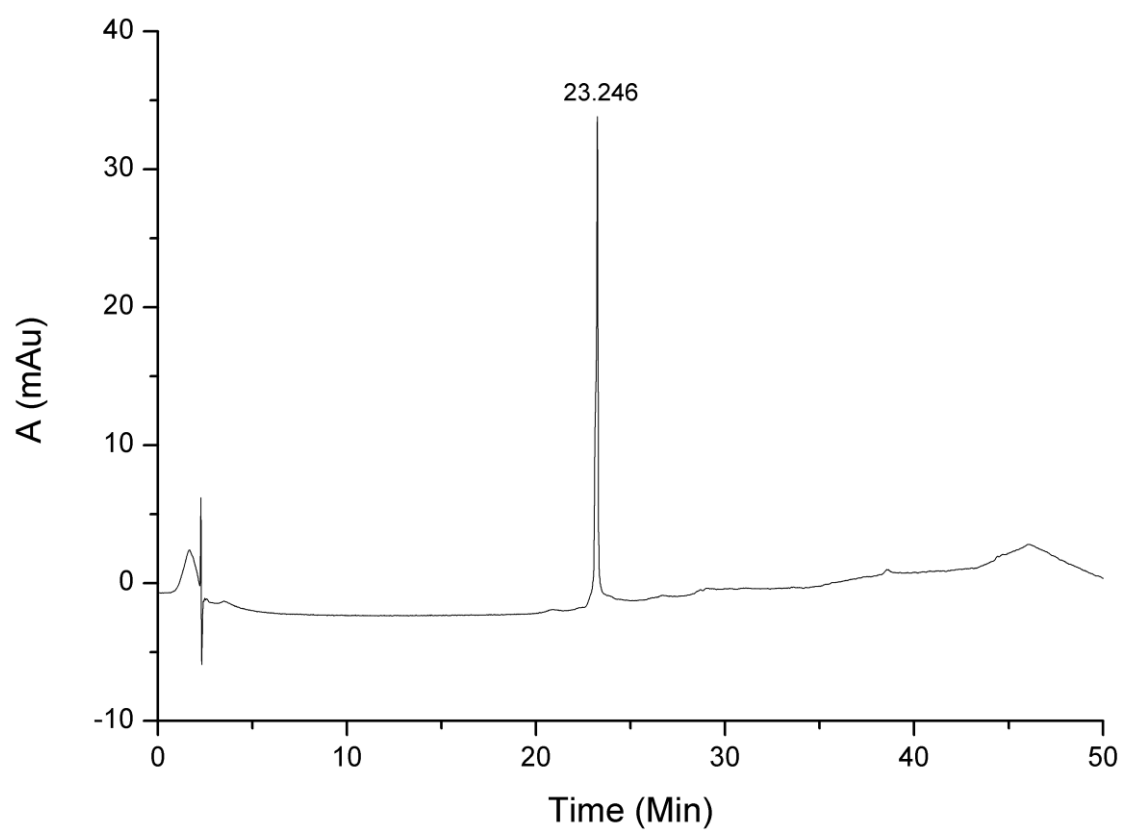

**Figure S74:** HPLC chromatogram of  $1\text{-H}^+\cdot 2\text{PF}_6^-$ .



## 6. Photophysical properties

UV-Vis absorption, fluorescence, electronic circular dichroism (ECD) and circularly polarized luminescence (CPL) spectra were recorded on an Olis DSM172 spectrophotometer equipped with a 150 W Xenon lamp. The spectra were recorded at *ca.*  $1 \times 10^{-5}$  M (for (R)/(S)-**1-H**<sup>+</sup>·2PF<sub>6</sub><sup>-</sup>, (R)/(S)-**1**·PF<sub>6</sub><sup>-</sup>, **8** and (R)/(S)-**13-H**<sup>+</sup>·PF<sub>6</sub><sup>-</sup>) and *ca.*  $1 \times 10^{-4}$  M (for (R)/(S)-**2-H**<sup>+</sup>·2PF<sub>6</sub><sup>-</sup>, (R)/(S)-**14-H**<sup>+</sup>·PF<sub>6</sub><sup>-</sup> and the partial UV-Vis and ECD spectra of (R)/(S)-**1-H**<sup>+</sup>·2PF<sub>6</sub><sup>-</sup> and (R)/(S)-**13-H**<sup>+</sup>·PF<sub>6</sub><sup>-</sup>) in HPLC grade CHCl<sub>3</sub> at 20 °C. For absorbance and fluorescence measurements, a fixed slit-width of 1 mm and 0.5 s of integration time were selected. For ECD measurements, a fixed slit-width of 1.000 mm and 0.5 s of integration time were selected. The ECD spectra shown correspond each one to an average spectrum of 30 scans. For CPL measurements, a fixed slit-width of 3.000 mm, a fixed excitation wavelength of 355 nm and 1.0 s of integration time were selected. Each CPL spectra correspond to an average spectrum calculated after 200 scans. UV-Vis absorption, fluorescence, ECD and CPL spectra of (R)/(S)-**1-H**<sup>+</sup>·2PF<sub>6</sub><sup>-</sup>, (R)/(S)-**1**·PF<sub>6</sub><sup>-</sup>, (R)/(S)-**1-H**<sup>+</sup> (from the protonation of (R)/(S)-**1**·PF<sub>6</sub><sup>-</sup>) and the switching experiments were carried out under Ar with degassed solvent.

Quantum yields were determined by measuring both absorbance and fluorescence of compounds **1-H**<sup>+</sup>·2PF<sub>6</sub><sup>-</sup>, **1**·PF<sub>6</sub><sup>-</sup>, **1-H**<sup>+</sup> (from the protonation of **1**·PF<sub>6</sub><sup>-</sup>), **8**, **13-H**<sup>+</sup>·PF<sub>6</sub><sup>-</sup> in CHCl<sub>3</sub>, using anthracene in EtOH as standard ( $\Phi_r = 0.27$ ).<sup>S12</sup> For the relative determination of the fluorescence quantum yield  $\Phi$  in a series of solvents, eq. 1 was used.<sup>S13, S14</sup>

$$\Phi_x = \Phi_r \times \frac{F_x}{F_r} \times \frac{1 - 10^{-A_r(\lambda_{ex})}}{1 - 10^{-A_x(\lambda_{ex})}} \times \frac{n_x^2}{n_r^2} \quad (\text{Eq. 1})$$

The subscripts *x* and *r* refer respectively to the sample and a reference (standard) fluorophore with known quantum yield  $\Phi_r$  in a specific solvent; *F* stands for the spectrally corrected, integrated fluorescence spectra; *A*( $\lambda_{ex}$ ) denotes the absorbance at the used excitation wavelength  $\lambda_{ex}$ ; and *n* represents the refractive index of the solvent (in principle at the average emission wavelength). To minimize inner filter effects, the absorbance at the excitation wavelength  $\lambda_{ex}$  was kept under 0.3. The measurements were performed using 10×10 mm cuvettes on non-degassed samples for **8** and **13-H**<sup>+</sup>·PF<sub>6</sub><sup>-</sup> and on degassed samples for **1-H**<sup>+</sup>·2PF<sub>6</sub><sup>-</sup>, **1**·PF<sub>6</sub><sup>-</sup> and **1-H**<sup>+</sup> (from the protonation of **1**·PF<sub>6</sub><sup>-</sup>).

**Table S2:** Quantum yields of rotaxanes and macrocycle.

| Compound                                                                                  | $\Phi$ |
|-------------------------------------------------------------------------------------------|--------|
| <b>1-H</b> <sup>+</sup> ·2PF <sub>6</sub> <sup>-</sup>                                    | 0.11   |
| <b>1</b> ·PF <sub>6</sub> <sup>-</sup>                                                    | 0.11   |
| <b>1-H</b> <sup>+</sup> (from the protonation of <b>1</b> ·PF <sub>6</sub> <sup>-</sup> ) | 0.11   |
| <b>8</b>                                                                                  | 0.18   |
| <b>13-H</b> <sup>+</sup> ·PF <sub>6</sub> <sup>-</sup>                                    | 0.19   |

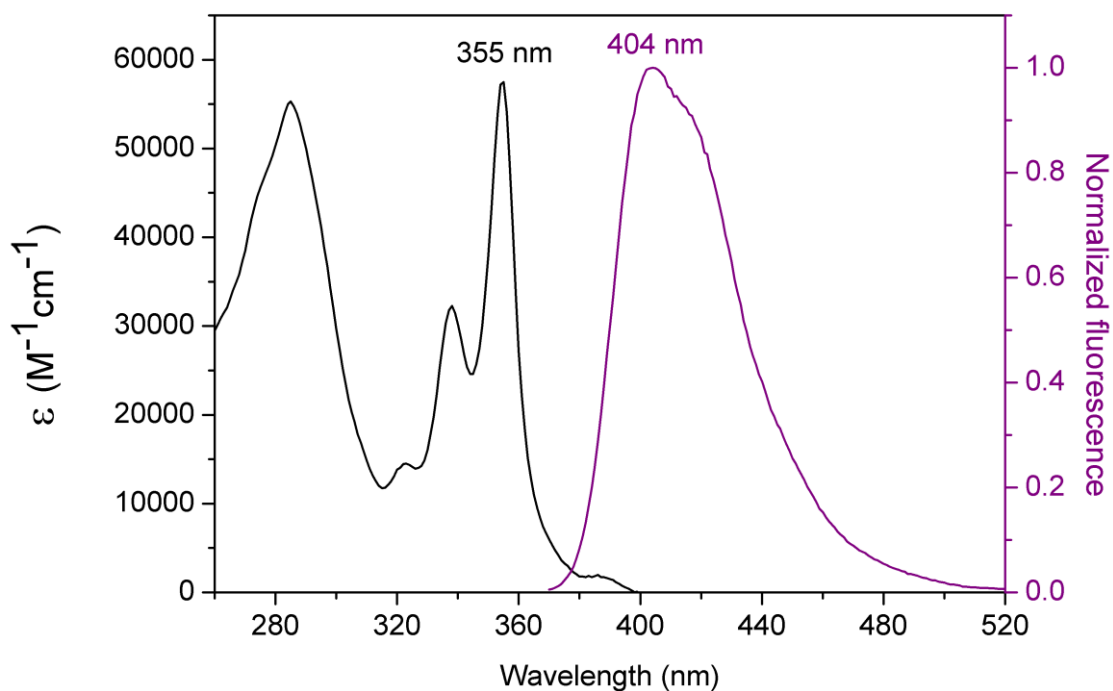

**Figure S75:** UV-Vis absorption (black line) and emission (purple line,  $\lambda_{exc} = 355$  nm) spectra of macrocycle **8**.

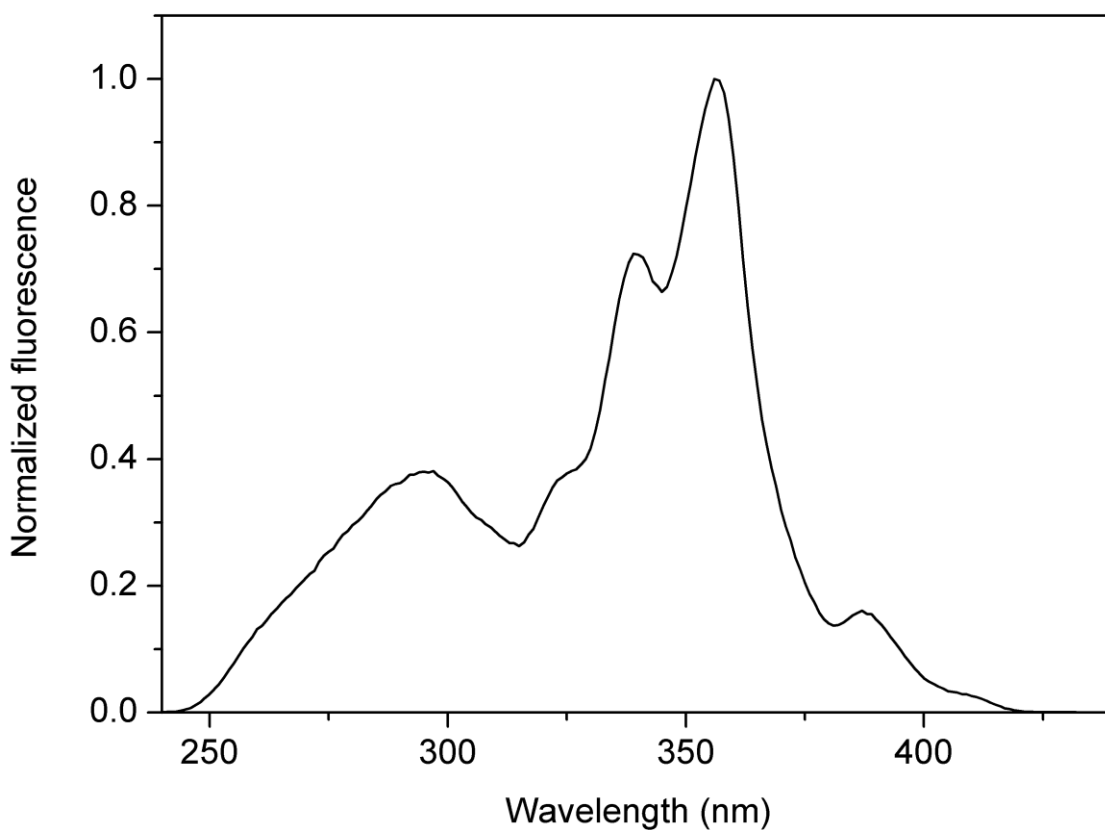

**Figure S76:** Excitation spectrum ( $\lambda_{emi} = 404$  nm) of macrocycle **8**.

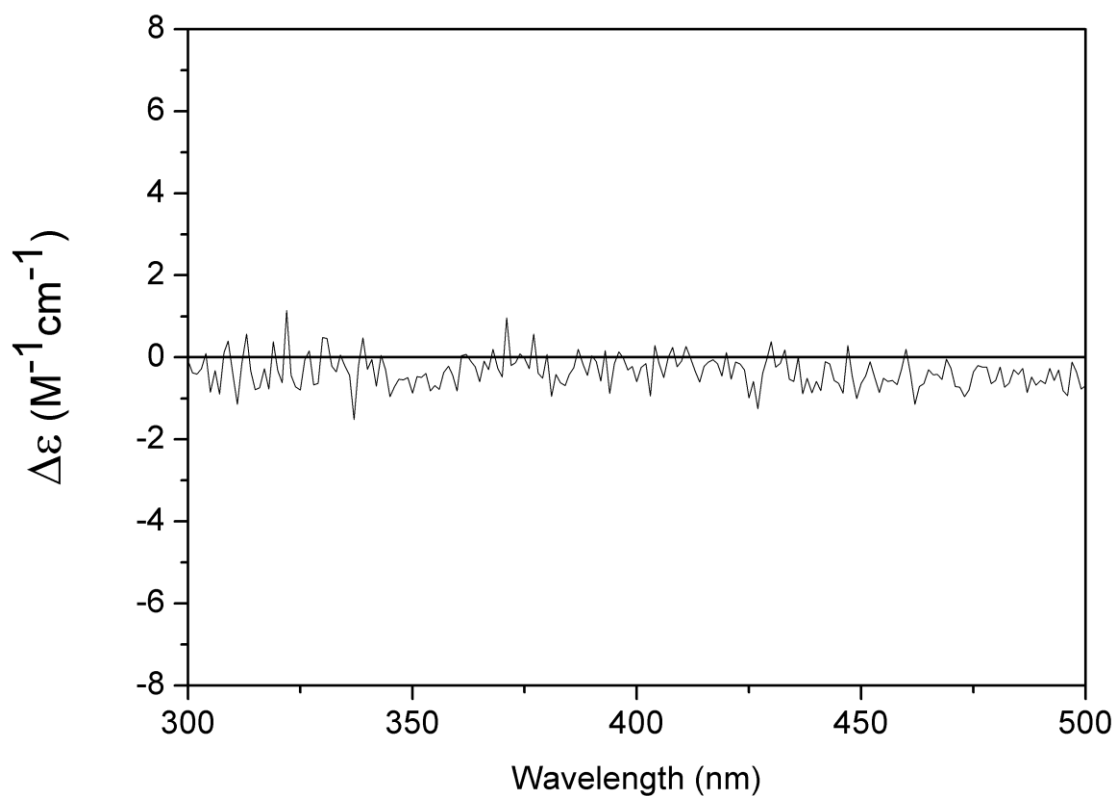

**Figure S77:** ECD spectrum of macrocycle **8** showing the absence of response.

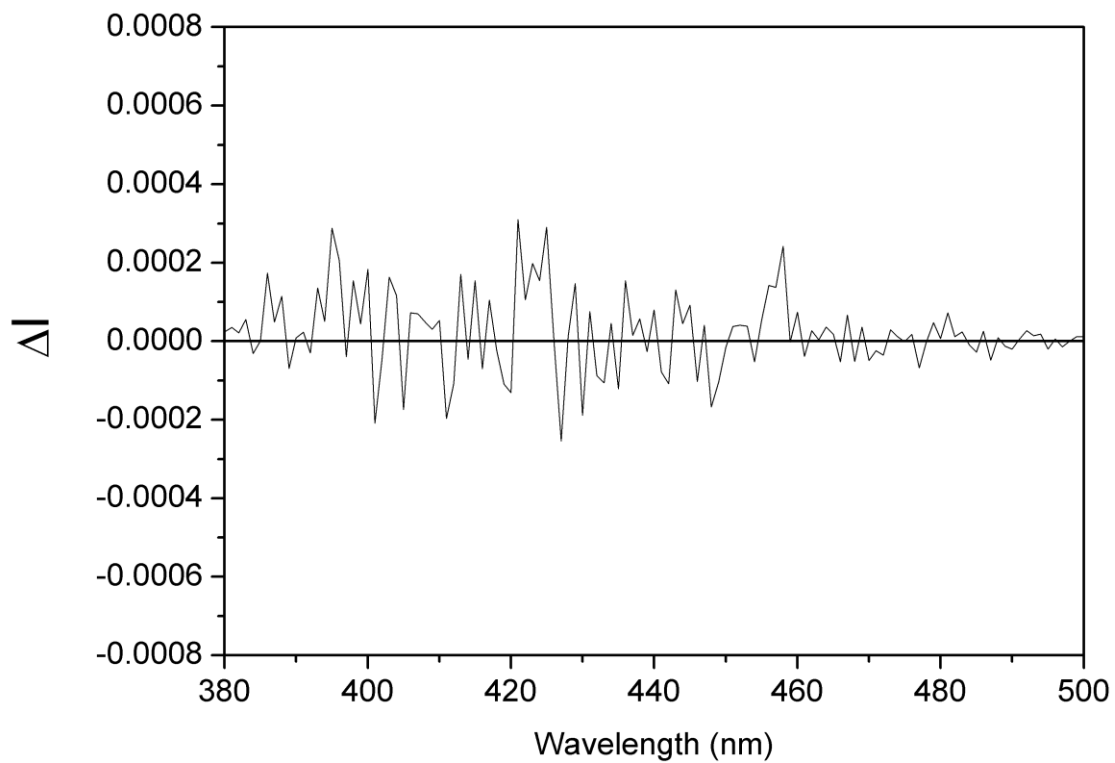

**Figure S78:** CPL ( $\lambda_{exc} = 355$  nm) spectrum of macrocycle **8** demonstrating the absence of response.

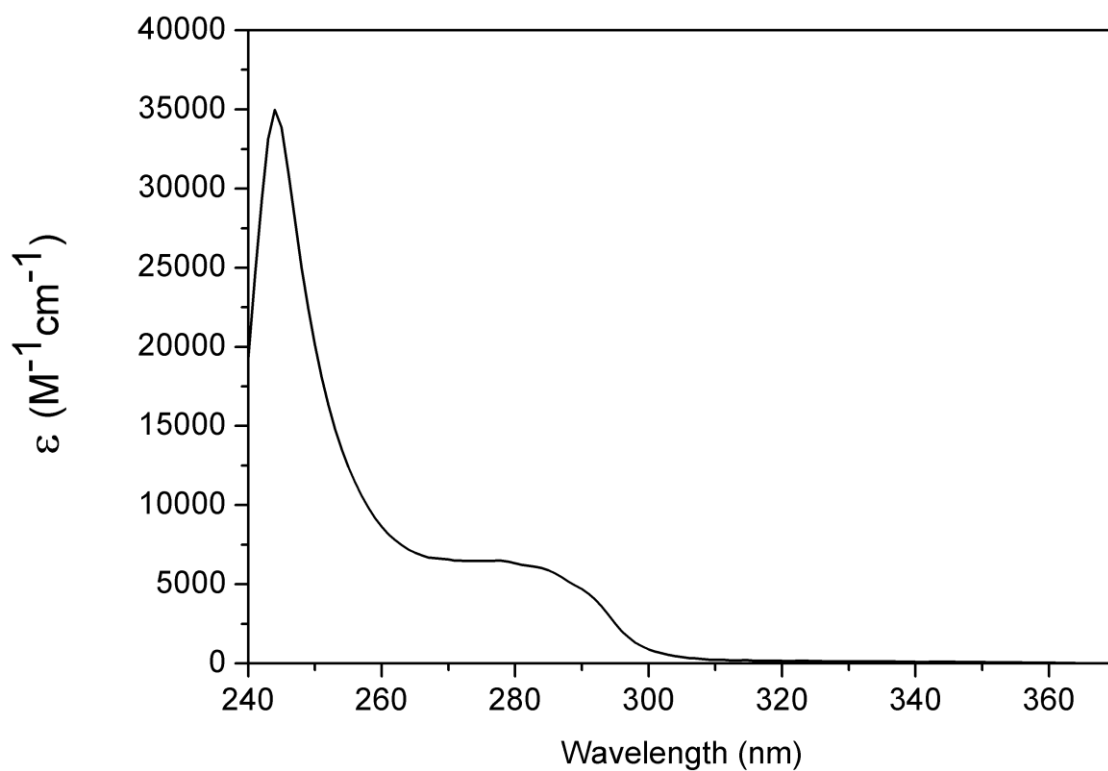

**Figure S79:** UV-Vis absorption spectrum of thread **14-H<sup>+</sup>·PF<sub>6</sub><sup>-</sup>**.

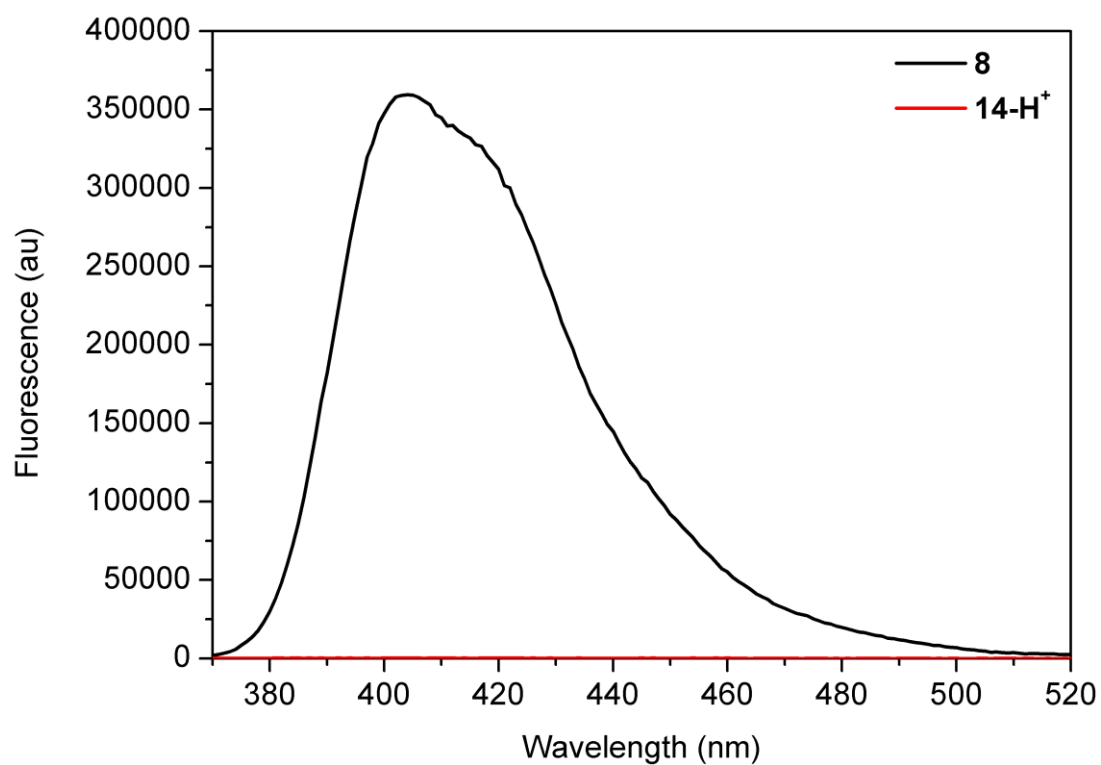

**Figure S80:** Emission ( $\lambda_{exc} = 355$  nm) spectra of macrocycle **8** and thread **14-H<sup>+</sup>·PF<sub>6</sub><sup>-</sup>** showing no fluorescence response for the thread.

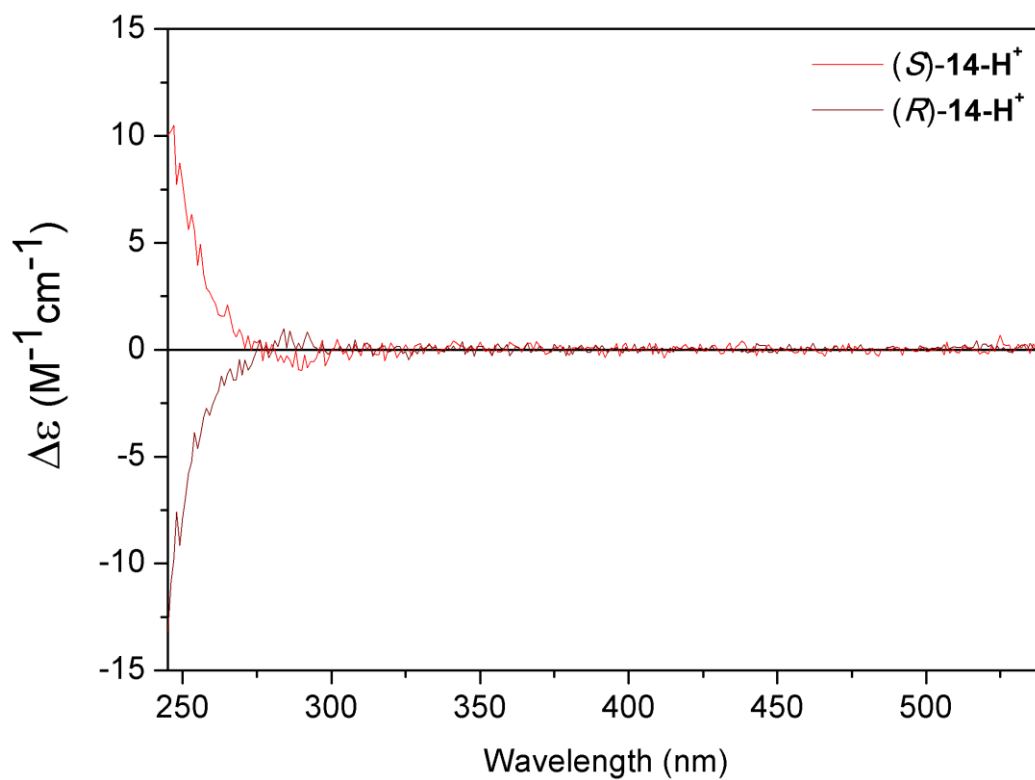

**Figure S81:** ECD spectra of threads (R)/(S)-14-H<sup>+</sup>·PF<sub>6</sub><sup>-</sup>.

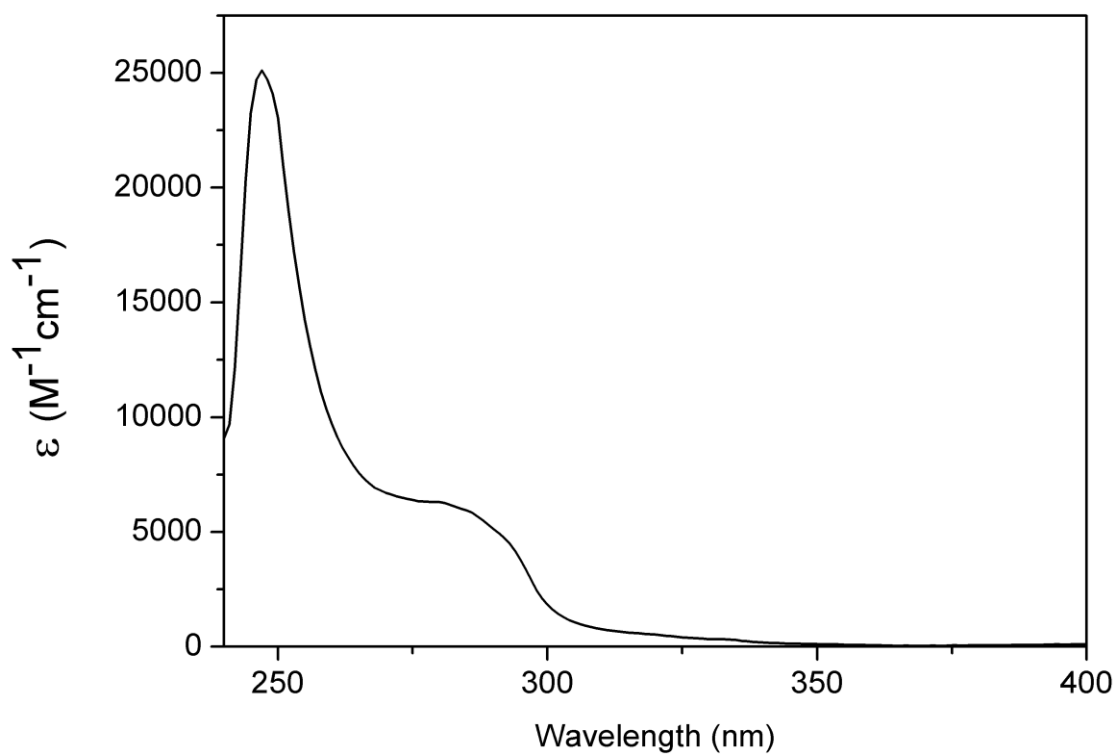

**Figure S82:** UV-Vis absorption spectrum of thread 2-H<sup>+</sup>·2PF<sub>6</sub><sup>-</sup>.

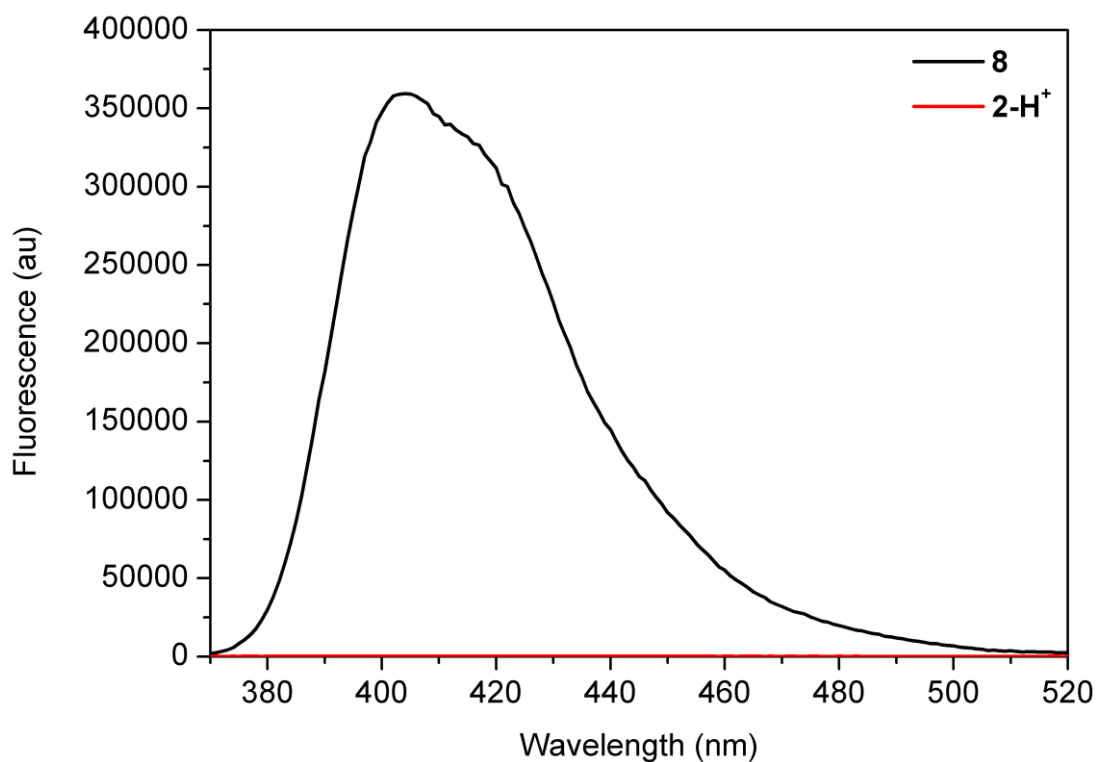

**Figure S83:** Emission ( $\lambda_{exc} = 355$  nm) spectra of macrocycle **8** and thread **2-H<sup>+</sup>·2PF<sub>6</sub><sup>-</sup>** showing no fluorescence response for the thread.

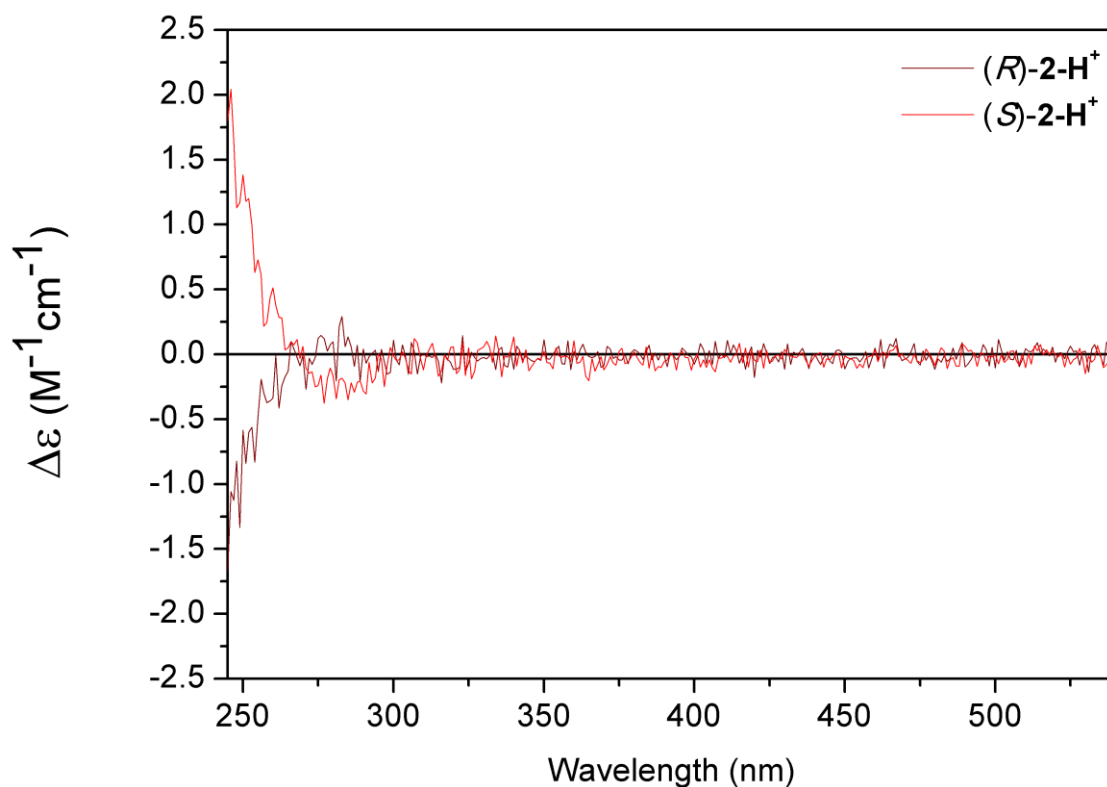

**Figure S84:** ECD spectra of threads **(R)/(S)-2-H<sup>+</sup>·2PF<sub>6</sub><sup>-</sup>**.

Since **(R)/(S)-2-H<sup>+</sup>·2PF<sub>6</sub><sup>-</sup>** and **(R)/(S)-14-H<sup>+</sup>·PF<sub>6</sub><sup>-</sup>** were not found to be fluorescent, no CPL was recorded.

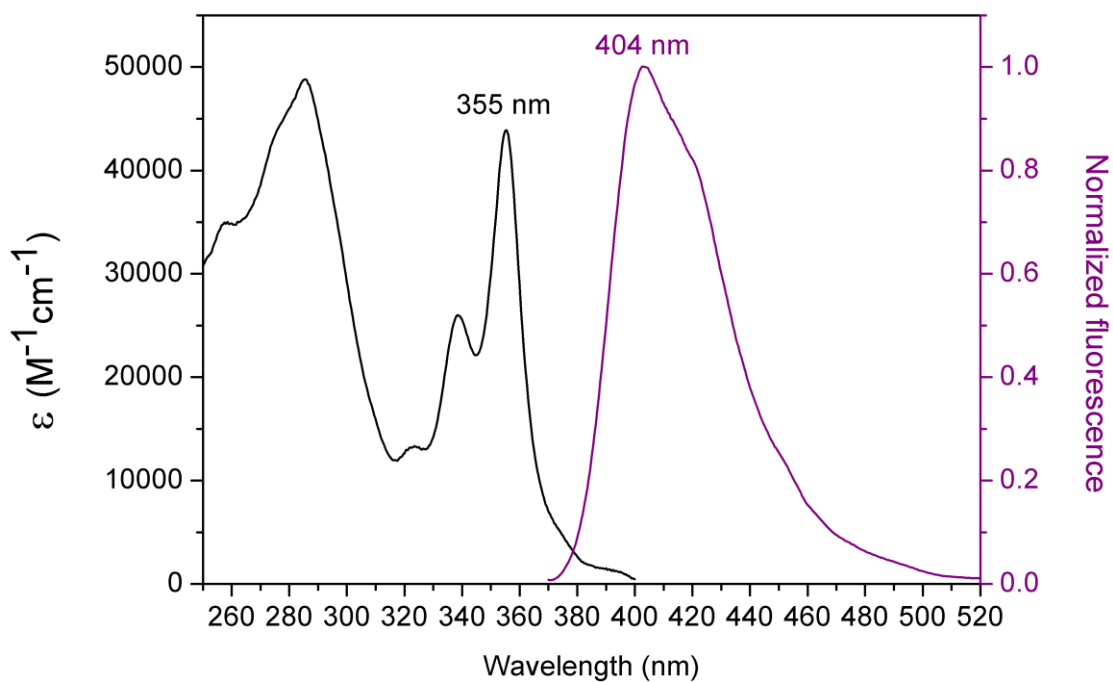

**Figure S85:** UV-Vis absorption (black line) and emission (purple line,  $\lambda_{exc} = 355$  nm) spectra of rotaxane **13-H<sup>+</sup>·PF<sub>6</sub><sup>-</sup>**.

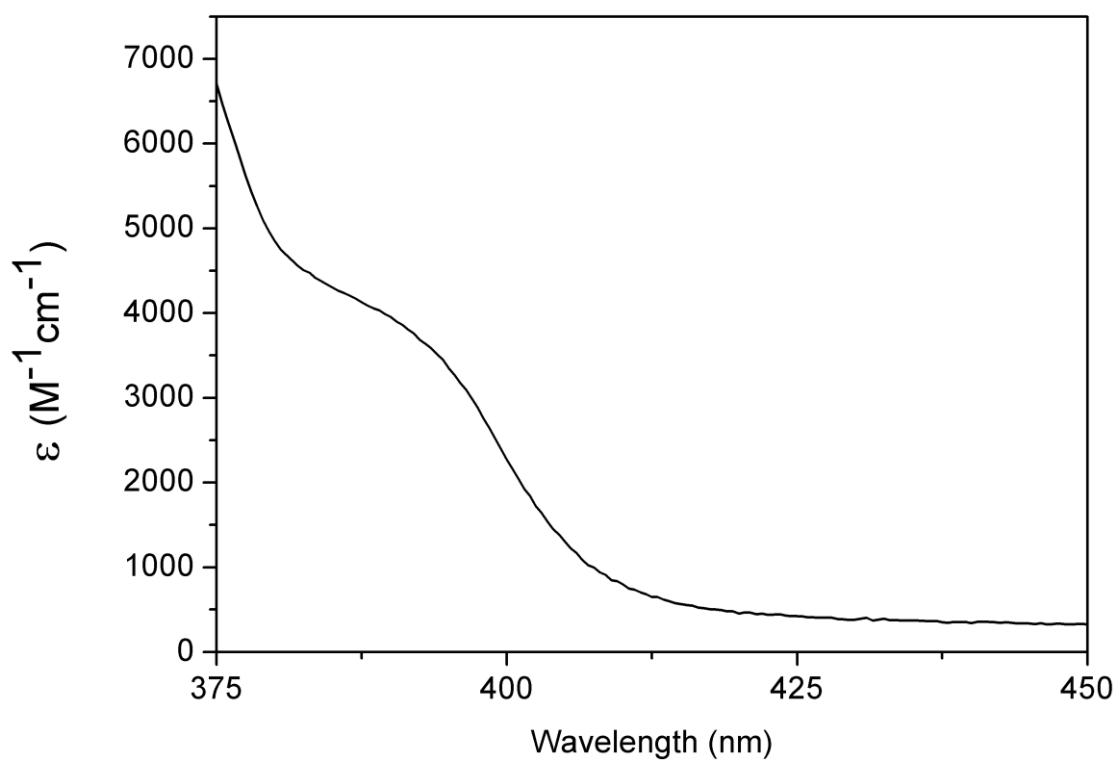

**Figure S86:** Partial UV-Vis absorption spectrum of rotaxane **13-H<sup>+</sup>·PF<sub>6</sub><sup>-</sup>**.

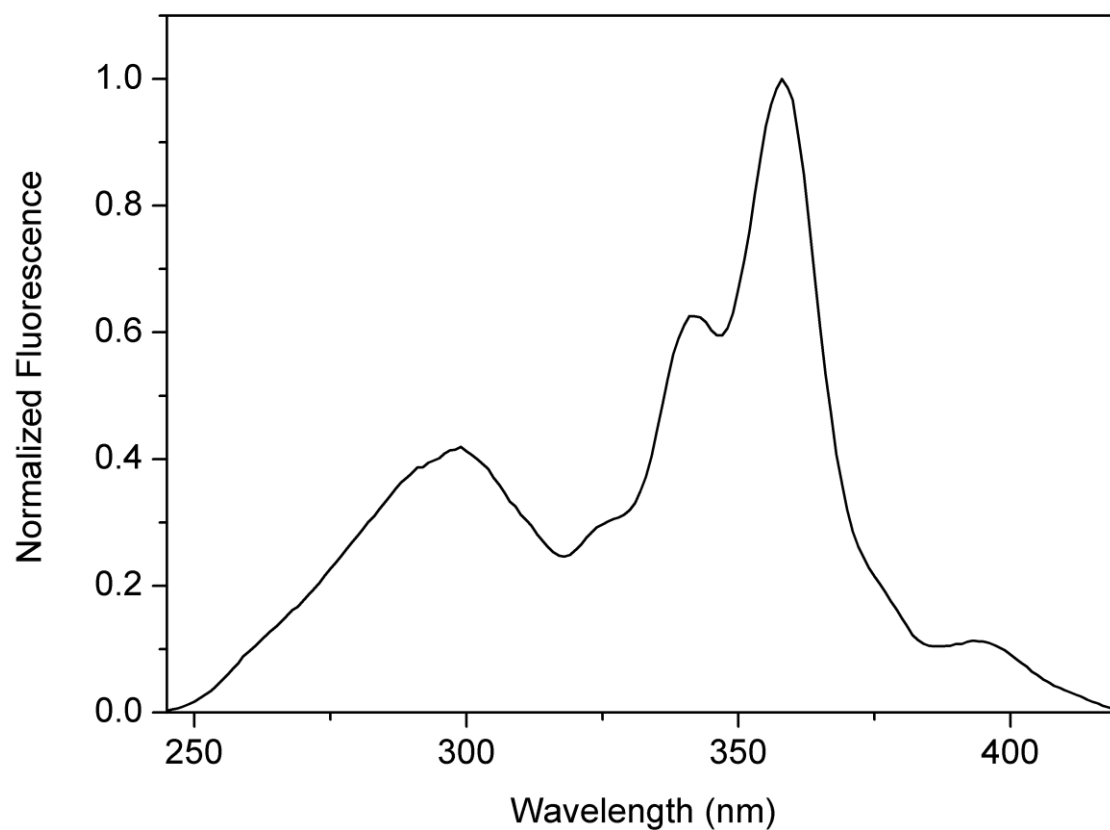

**Figure S87:** Excitation spectrum ( $\lambda_{emi} = 403$  nm) of rotaxane **13-H<sup>+</sup>·PF<sub>6</sub><sup>-</sup>**.

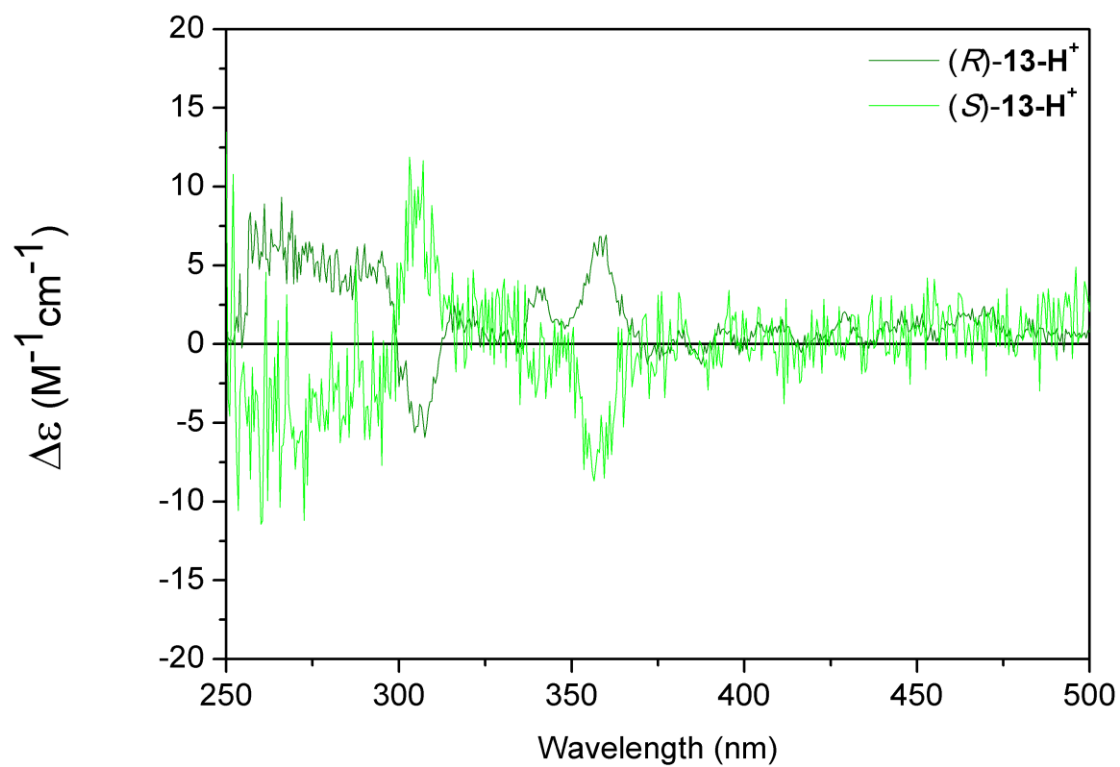

**Figure S88:** ECD spectra of rotaxane (R)/(S)-**13-H<sup>+</sup>·PF<sub>6</sub><sup>-</sup>**.



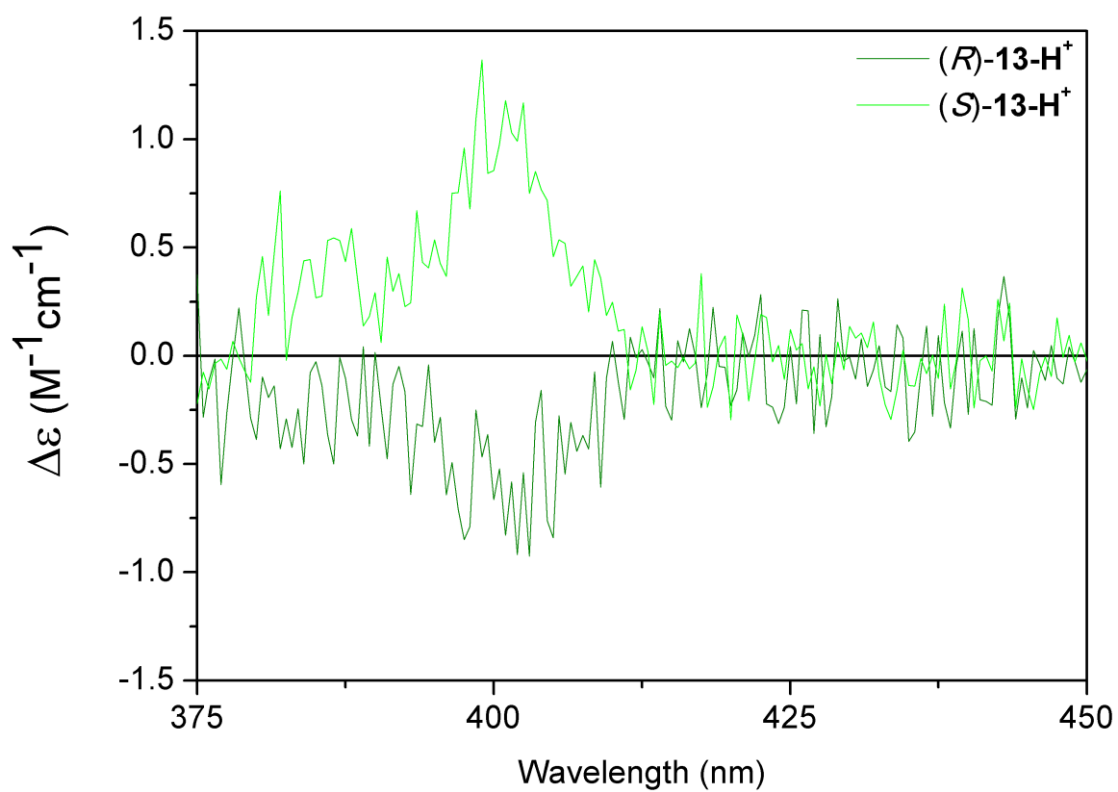

**Figure S89:** Partial ECD spectra of rotaxane  $(R)/(S)\text{-13-H}^+\cdot\text{PF}_6^-$ .

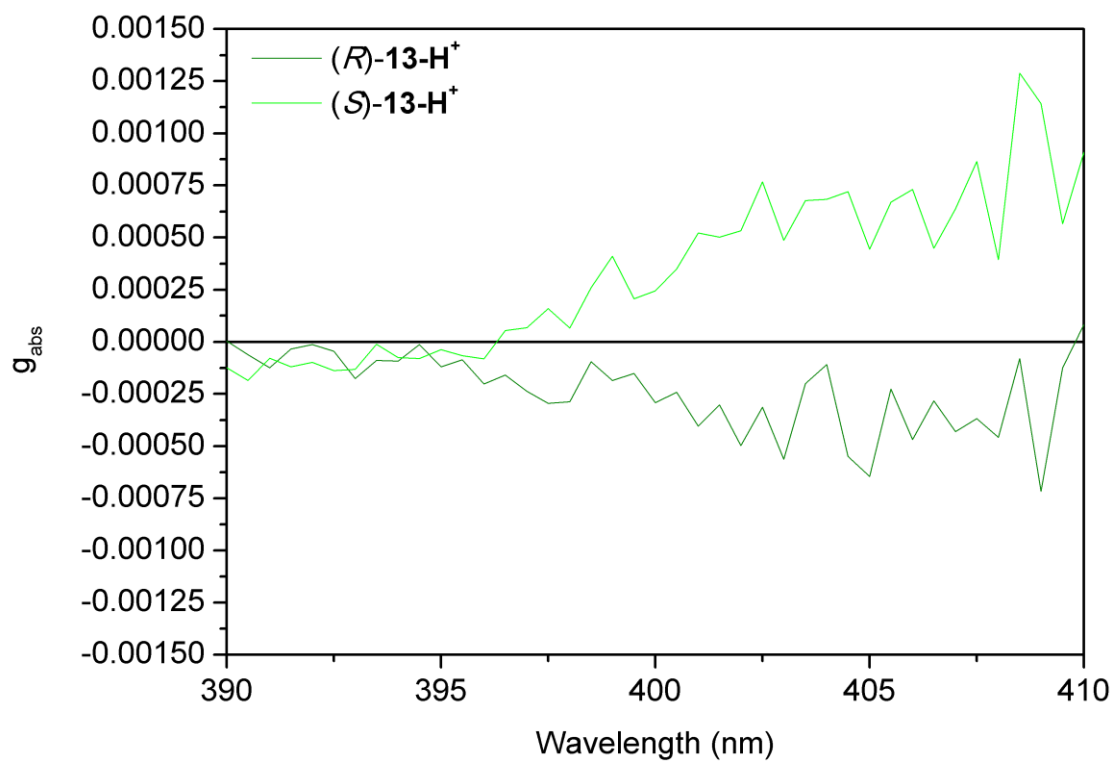

**Figure S90:** Partial  $g_{abs}$  spectra of rotaxane  $(R)/(S)\text{-13-H}^+\cdot\text{PF}_6^-$  ( $g_{abs} = 5 \times 10^{-4}$ ).

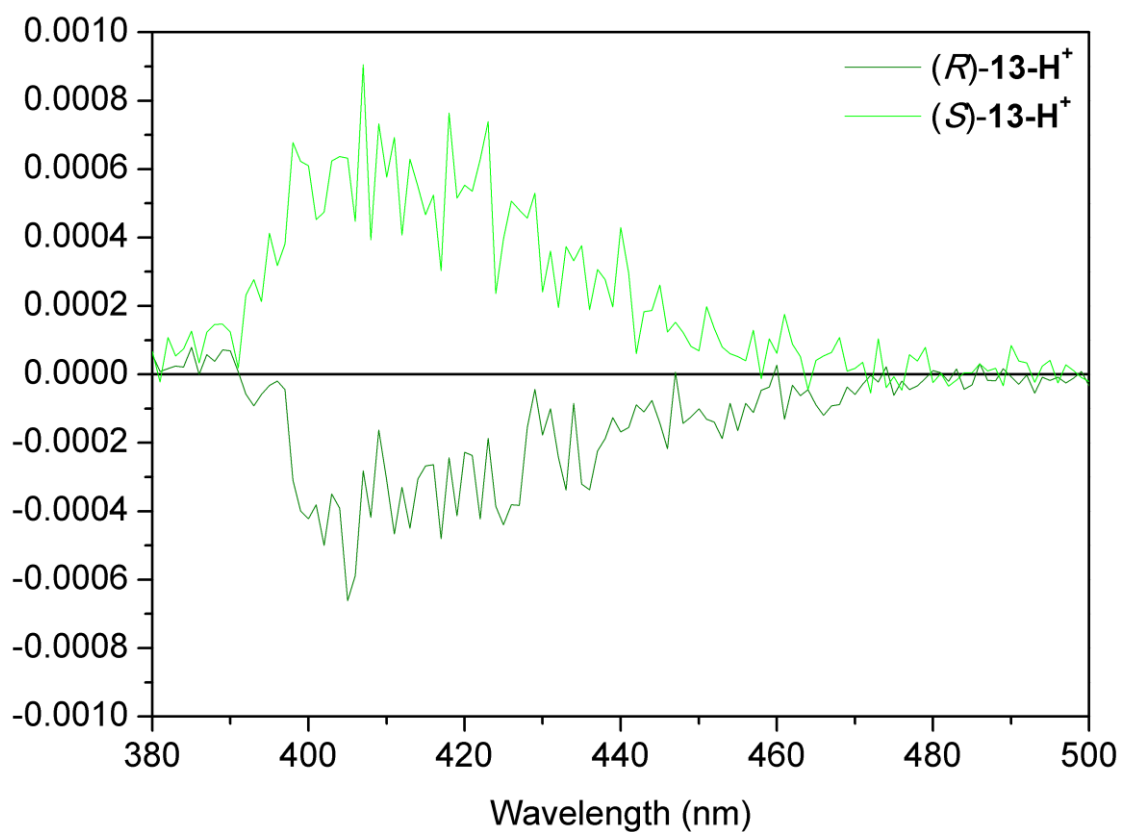

**Figure S91:** CPL ( $\lambda_{exc} = 355$  nm) spectra of rotaxane  $(R)/(S)\text{-13-H}^+\cdot\text{PF}_6^-$ .

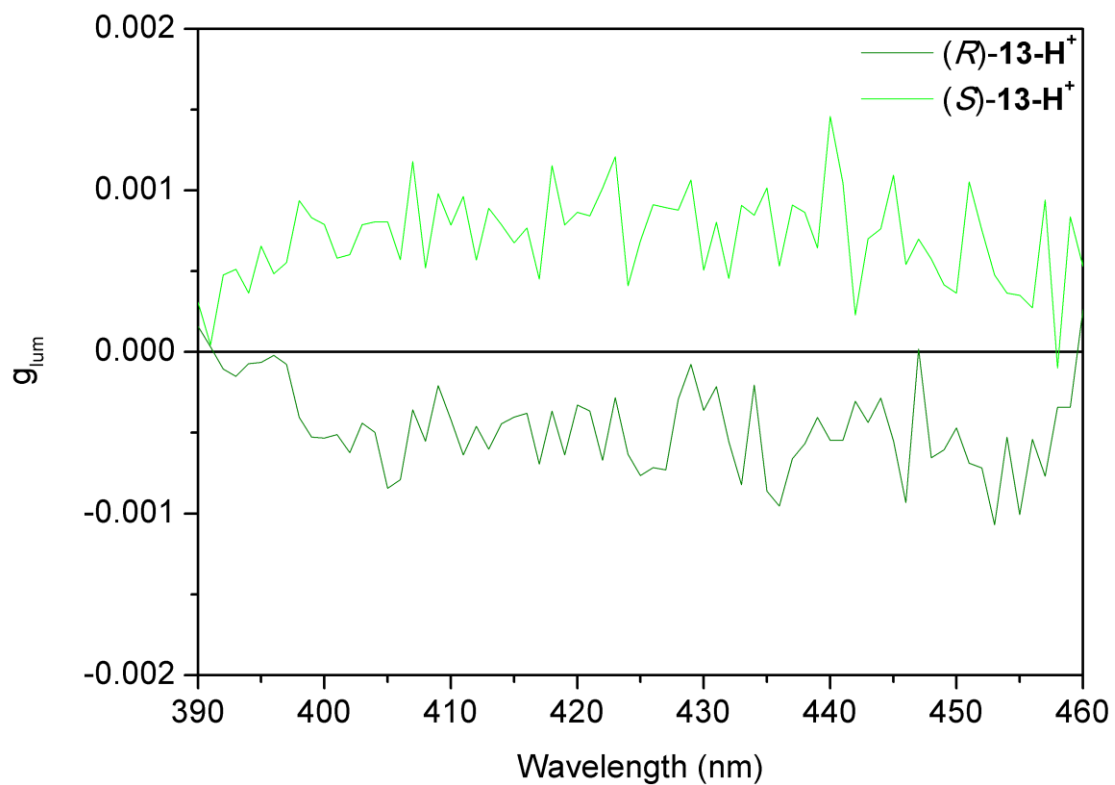

**Figure S92:**  $g_{lum}$  ( $\lambda_{exc} = 355$  nm) spectra of rotaxane  $(R)/(S)\text{-13-H}^+\cdot\text{PF}_6^-$  ( $g_{lum} = 5 \times 10^{-4}$ ).

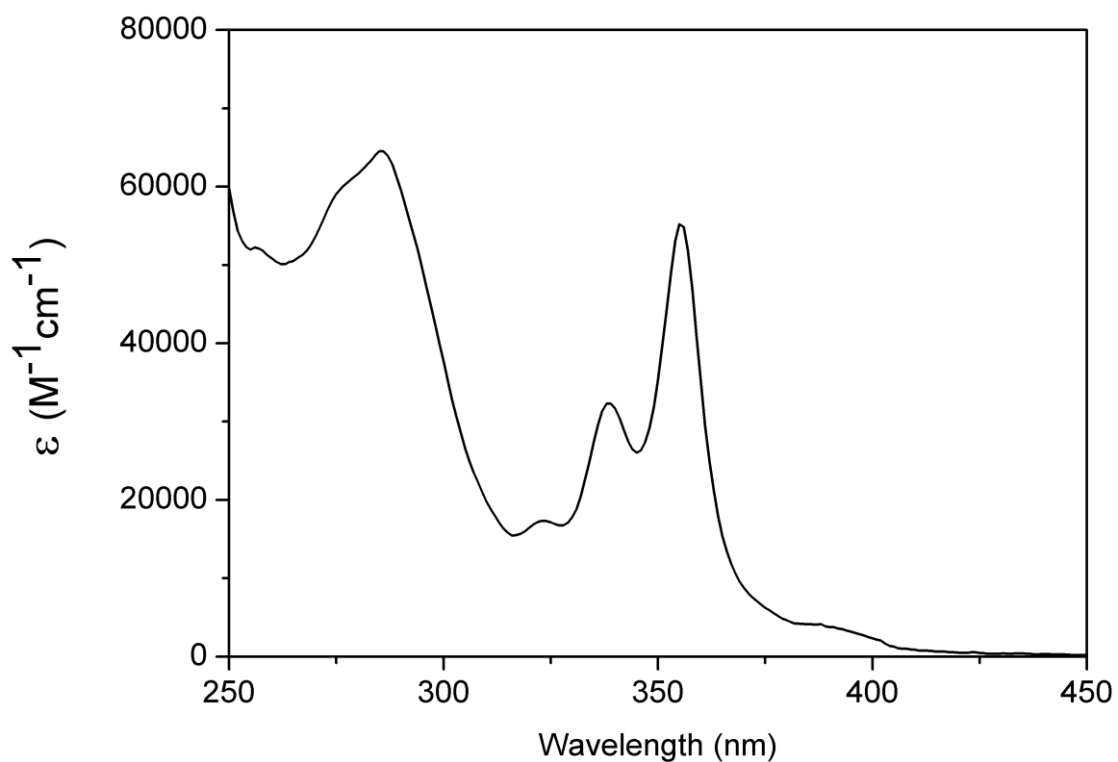

**Figure S93:** UV-Vis absorption spectrum of rotaxane **1-H<sup>+</sup>·2PF<sub>6</sub><sup>-</sup>**.

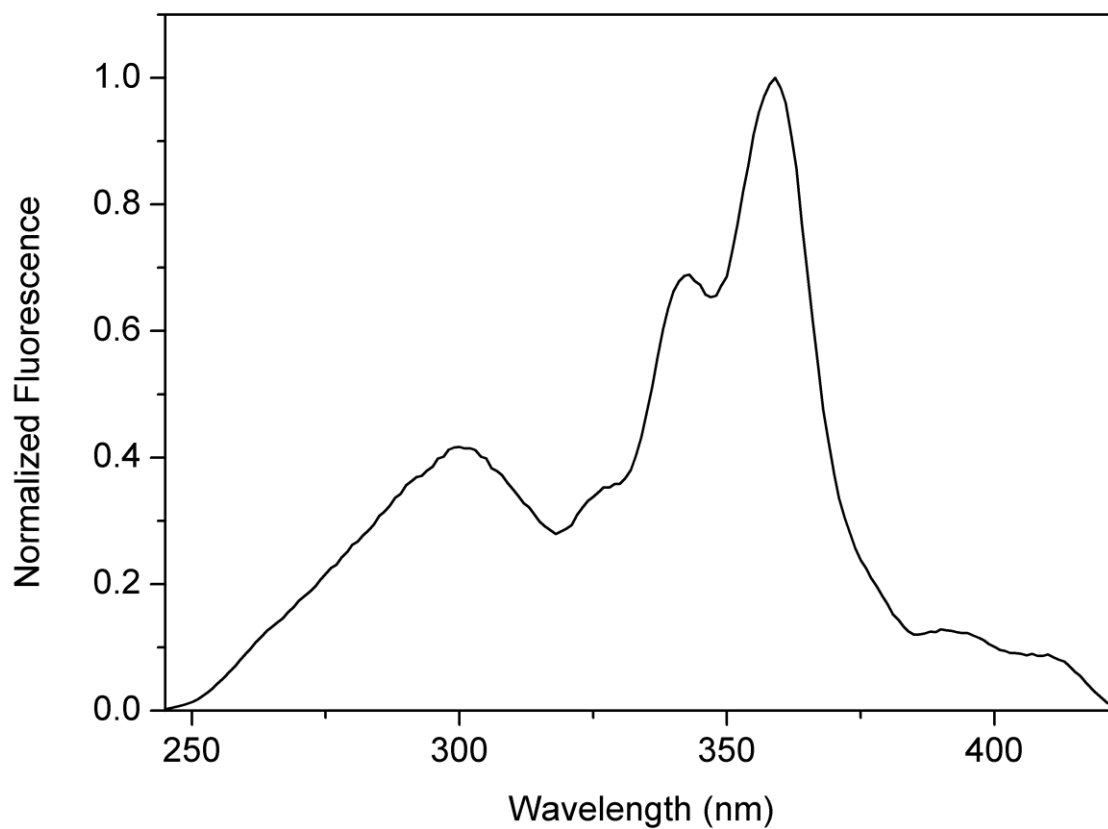

**Figure S94:** Excitation spectrum ( $\lambda_{emi} = 404$  nm) of rotaxane **1-H<sup>+</sup>·2PF<sub>6</sub><sup>-</sup>**.

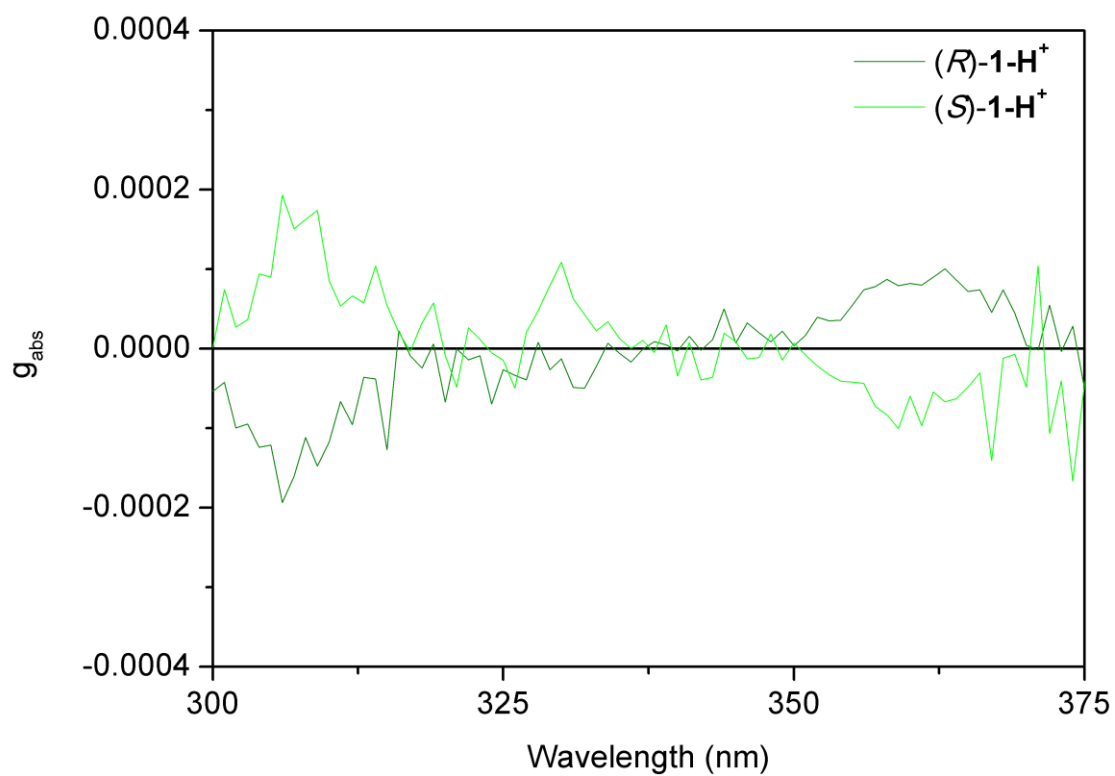

**Figure S95:**  $g_{abs}$  spectra of rotaxane  $(R)/(S)\text{-1-H}^+\cdot 2\text{PF}_6^-$ .

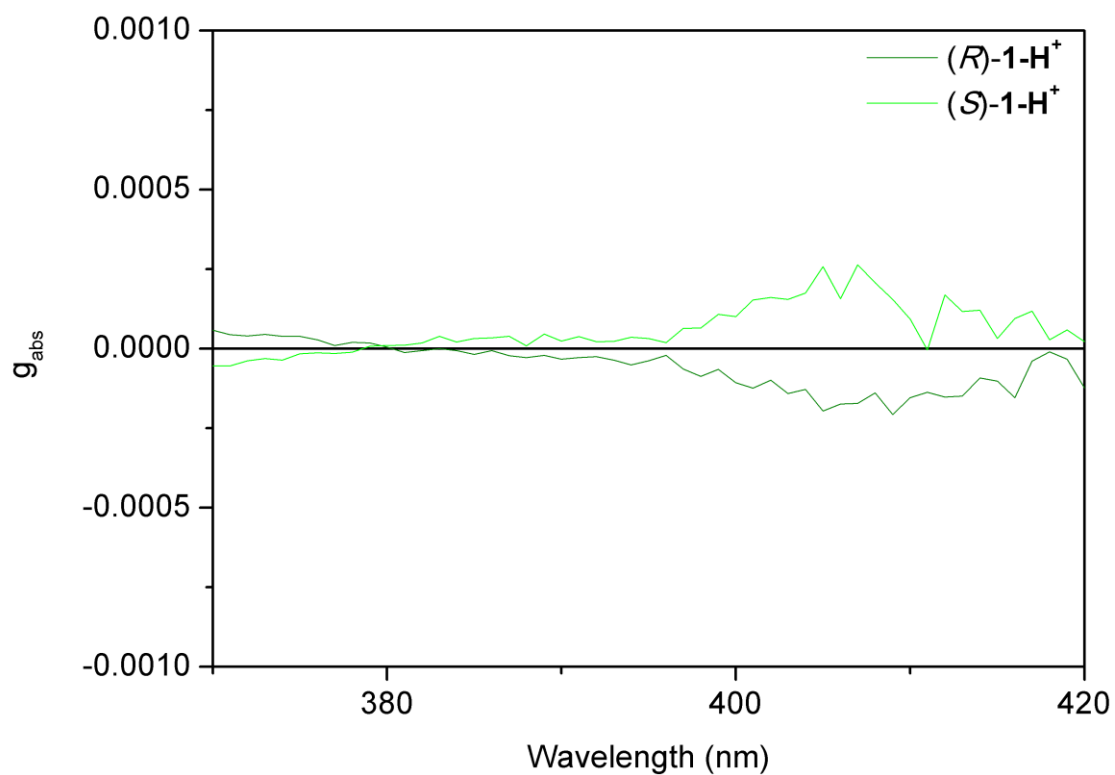

**Figure S96:** Partial  $g_{abs}$  spectra of rotaxane  $(R)/(S)\text{-1-H}^+\cdot 2\text{PF}_6^-$  ( $g_{abs} = 3 \times 10^{-4}$ ).

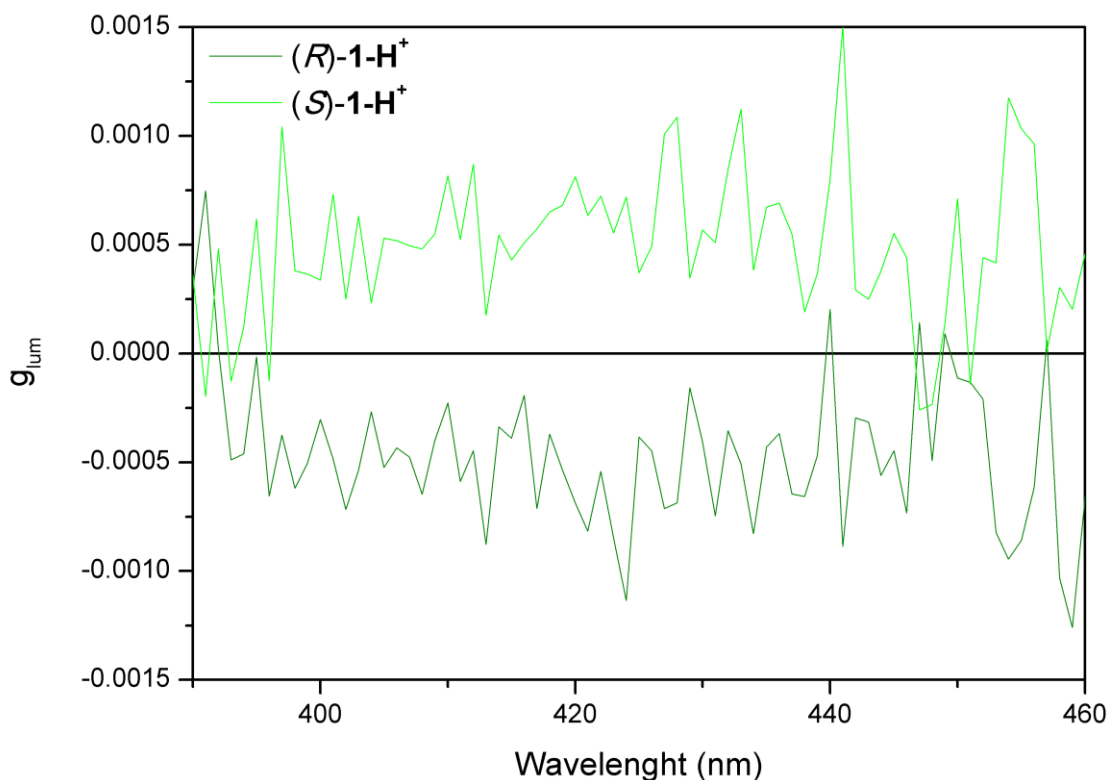

**Figure S97:**  $g_{lum}$  ( $\lambda_{exc} = 355$  nm) spectra of rotaxane (*R*)/(*S*)-**1-H**<sup>+</sup>·2PF<sub>6</sub><sup>-</sup> ( $g_{lum} = 5 \times 10^{-4}$ ).

#### Switching experiments:

To obtain (*S*)-**1**·PF<sub>6</sub><sup>-</sup> for photophysical measurements: Under an Ar atmosphere, an excess of K<sub>2</sub>CO<sub>3</sub> was added to a solution of (*S*)-**1-H**<sup>+</sup>·2PF<sub>6</sub><sup>-</sup> in CHCl<sub>3</sub> ( $1.2 \times 10^{-5}$  mol L<sup>-1</sup>, 2.5 mL). The suspension was shaken for 2 min and subsequently filtered through a 0.2 μm filter to remove the excess of base.

(*R*)-**1**·PF<sub>6</sub><sup>-</sup> was obtained following the same procedure starting from (*R*)-**1-H**<sup>+</sup>·2PF<sub>6</sub><sup>-</sup>.

To obtain (*S*)-**1-H**<sup>+</sup> for photophysical measurements: Under inert atmosphere, to a solution of (*S*)-**1**·PF<sub>6</sub><sup>-</sup> in CHCl<sub>3</sub> ( $1.2 \times 10^{-5}$  mol L<sup>-1</sup>, 2.5 mL) was added a degassed solution of CF<sub>3</sub>CO<sub>2</sub>H in CHCl<sub>3</sub> (0.2 %, 17.3 μL, 15 equiv.). The resulting solution was shaken for 1 min.

(*R*)-**1-H**<sup>+</sup> was obtained following the same procedure starting from (*R*)-**1**·PF<sub>6</sub><sup>-</sup>.

The *in situ* switching was carried out by repeatedly following the procedures described above on the same sample.

#### Election of the base for the switching experiments:

For the switching mechanism we also tried other bases such as NaOH, a phosphazene-bound base (BEMP resin), Et<sub>3</sub>N and DBU in addition to the chosen K<sub>2</sub>CO<sub>3</sub>. The use of NaOH or the phosphazene resin resulted in the decomposition of the system. Therefore, these bases were discarded. To deprotonate the system with Et<sub>3</sub>N, 50 equivalents were required as monitored by CD measurements, thus generating a large amount of salts upon reprotonation. As a result, the “on” state that did not show a better CPL response than that observed when using K<sub>2</sub>CO<sub>3</sub>. Finally, although DBU and K<sub>2</sub>CO<sub>3</sub> gave very similar results, we chose K<sub>2</sub>CO<sub>3</sub> as it resulted more convenient. K<sub>2</sub>CO<sub>3</sub> is solid and it has very poor solubility in CH<sub>3</sub>Cl so it can be used in excess as this surplus can be easily removed by filtration, has no effects on the concentration of the solution and the control of the stoichiometry added was less critical.

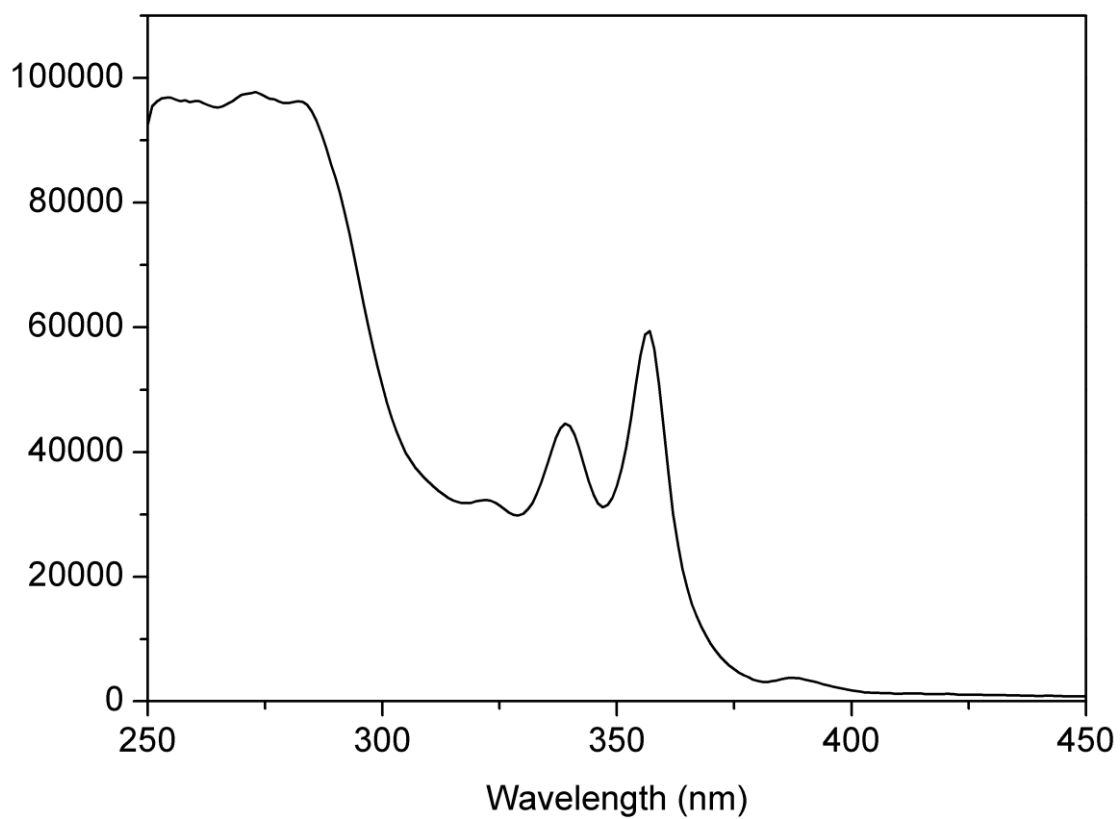

**Figure S98:** UV-Vis absorption spectrum of rotaxane  $1 \cdot \text{PF}_6^-$ .

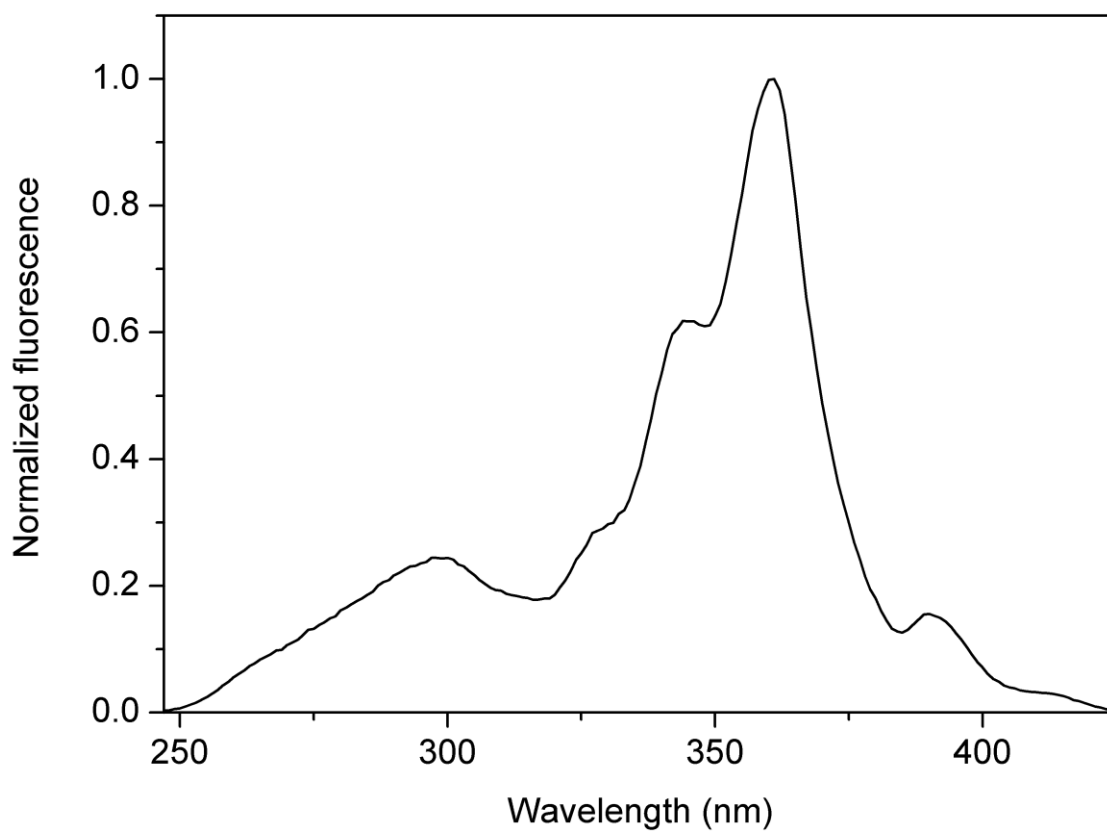

**Figure S99:** Excitation spectrum ( $\lambda_{em} = 404 \text{ nm}$ ) of rotaxane  $1 \cdot \text{PF}_6^-$ .

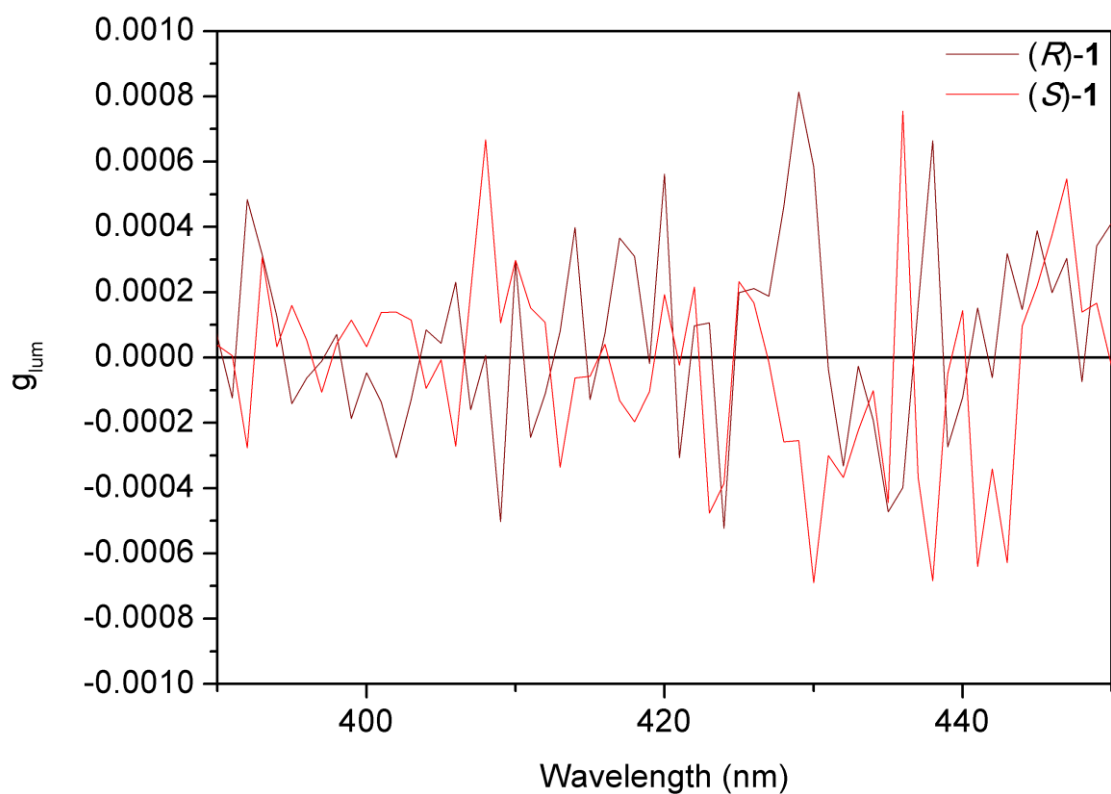

**Figure S100:**  $g_{lum}$  ( $\lambda_{exc} = 355$  nm) spectra of rotaxane (R)/(S)-**1**·PF<sub>6</sub><sup>-</sup> ( $g_{lum} = 0$ ).

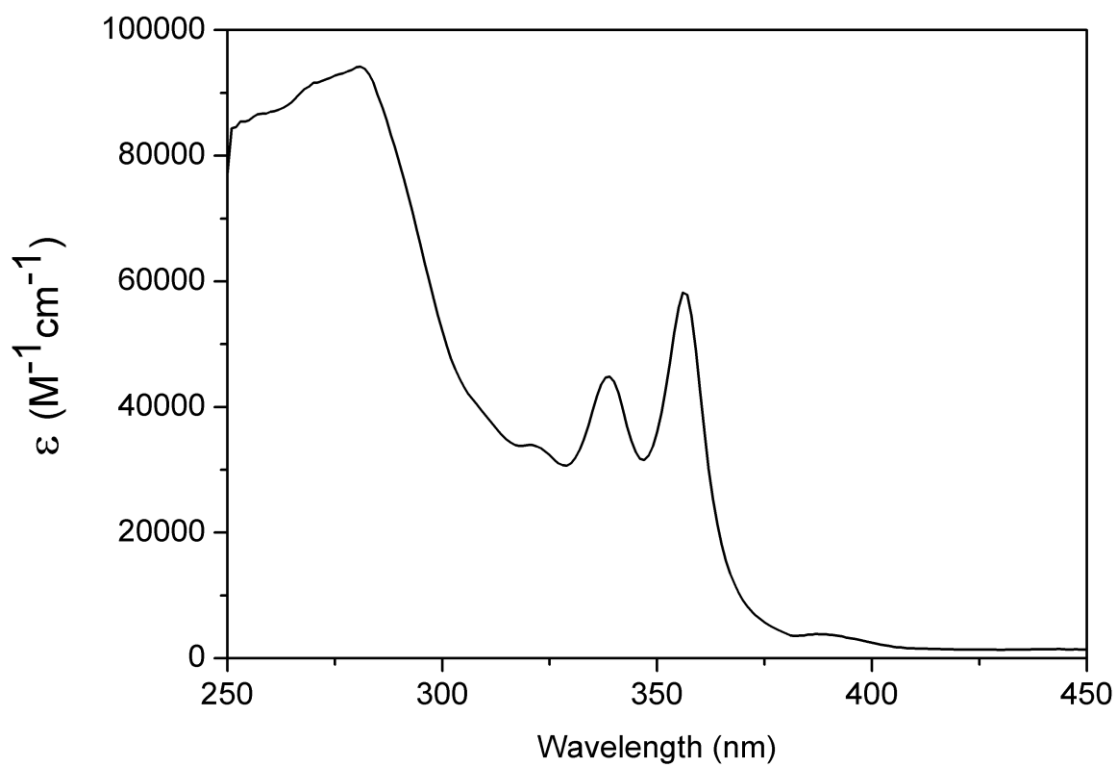

**Figure S101:** UV-Vis absorption spectrum of rotaxane **1**-H<sup>+</sup> (from the protonation of **1**·PF<sub>6</sub><sup>-</sup>).

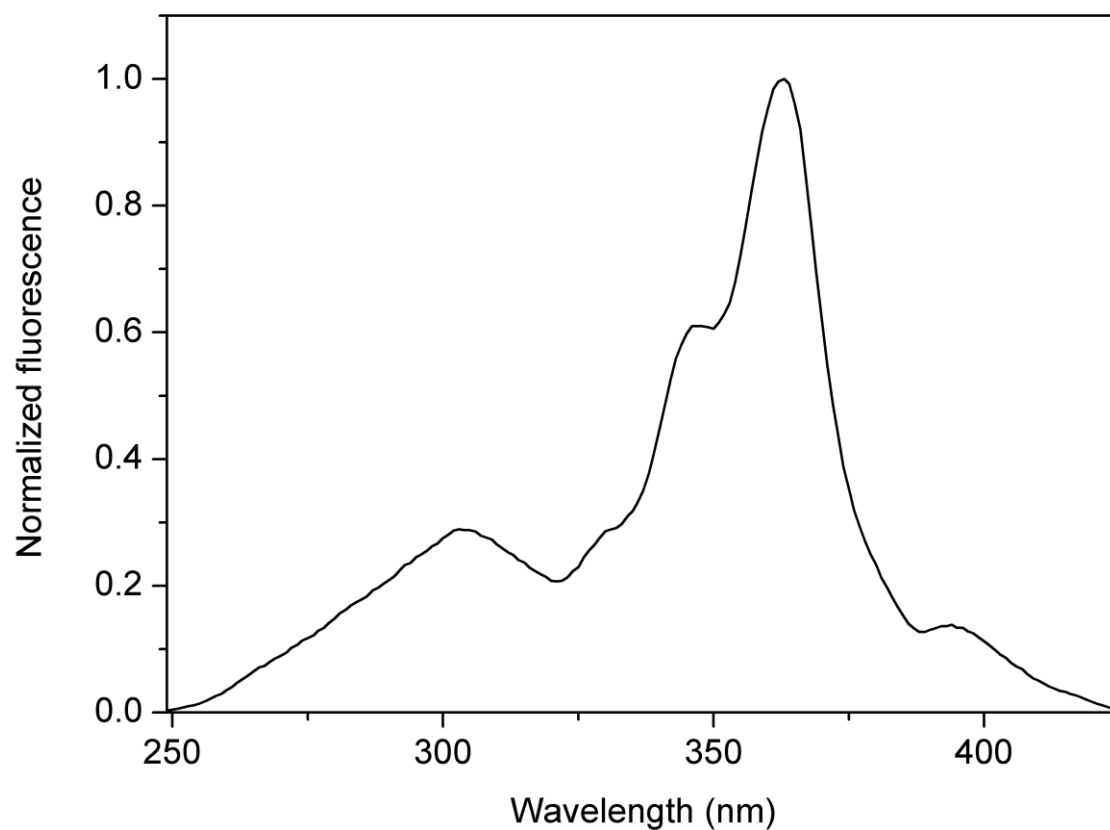

**Figure S102:** Excitation spectrum ( $\lambda_{emi} = 404$  nm) of rotaxane **1-H<sup>+</sup>** (from the protonation of **1**·PF<sub>6</sub><sup>-</sup>).

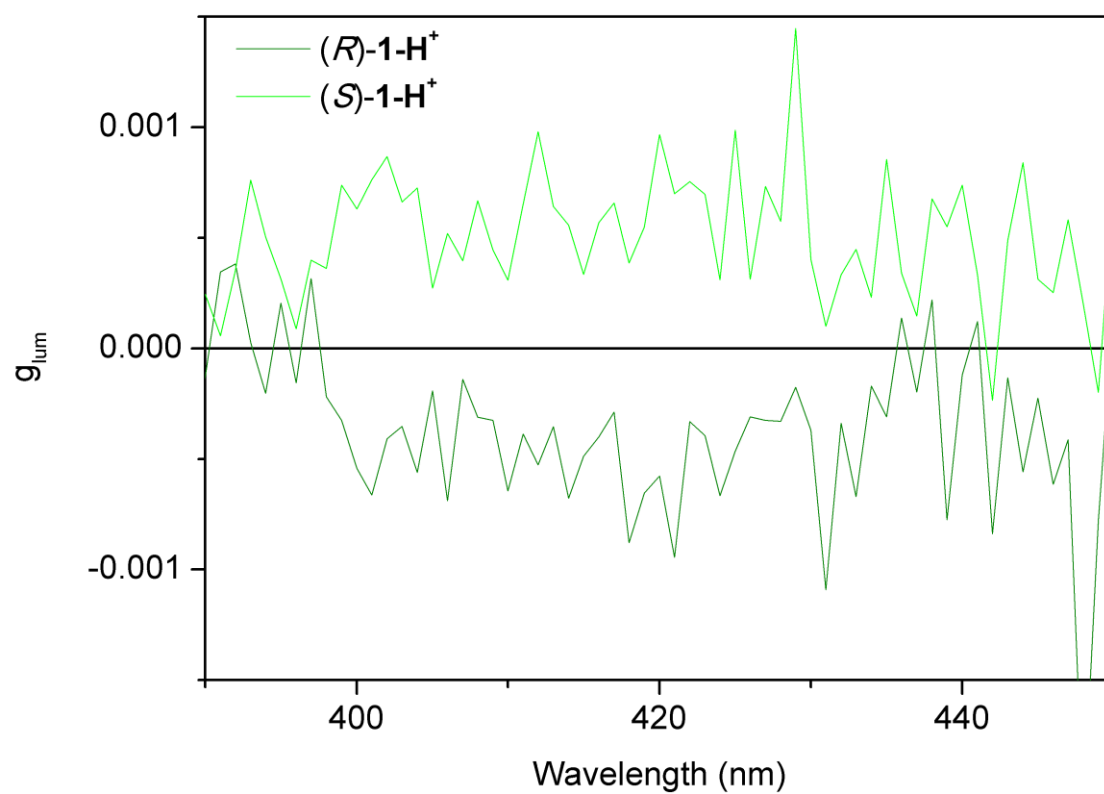

**Figure S103:**  $g_{lum}$  ( $\lambda_{exc} = 355$  nm) spectra of rotaxanes (R)/(S)-**1-H<sup>+</sup>** (from the protonation of **1**·PF<sub>6</sub><sup>-</sup>,  $g_{lum} = 5 \times 10^{-4}$ ).



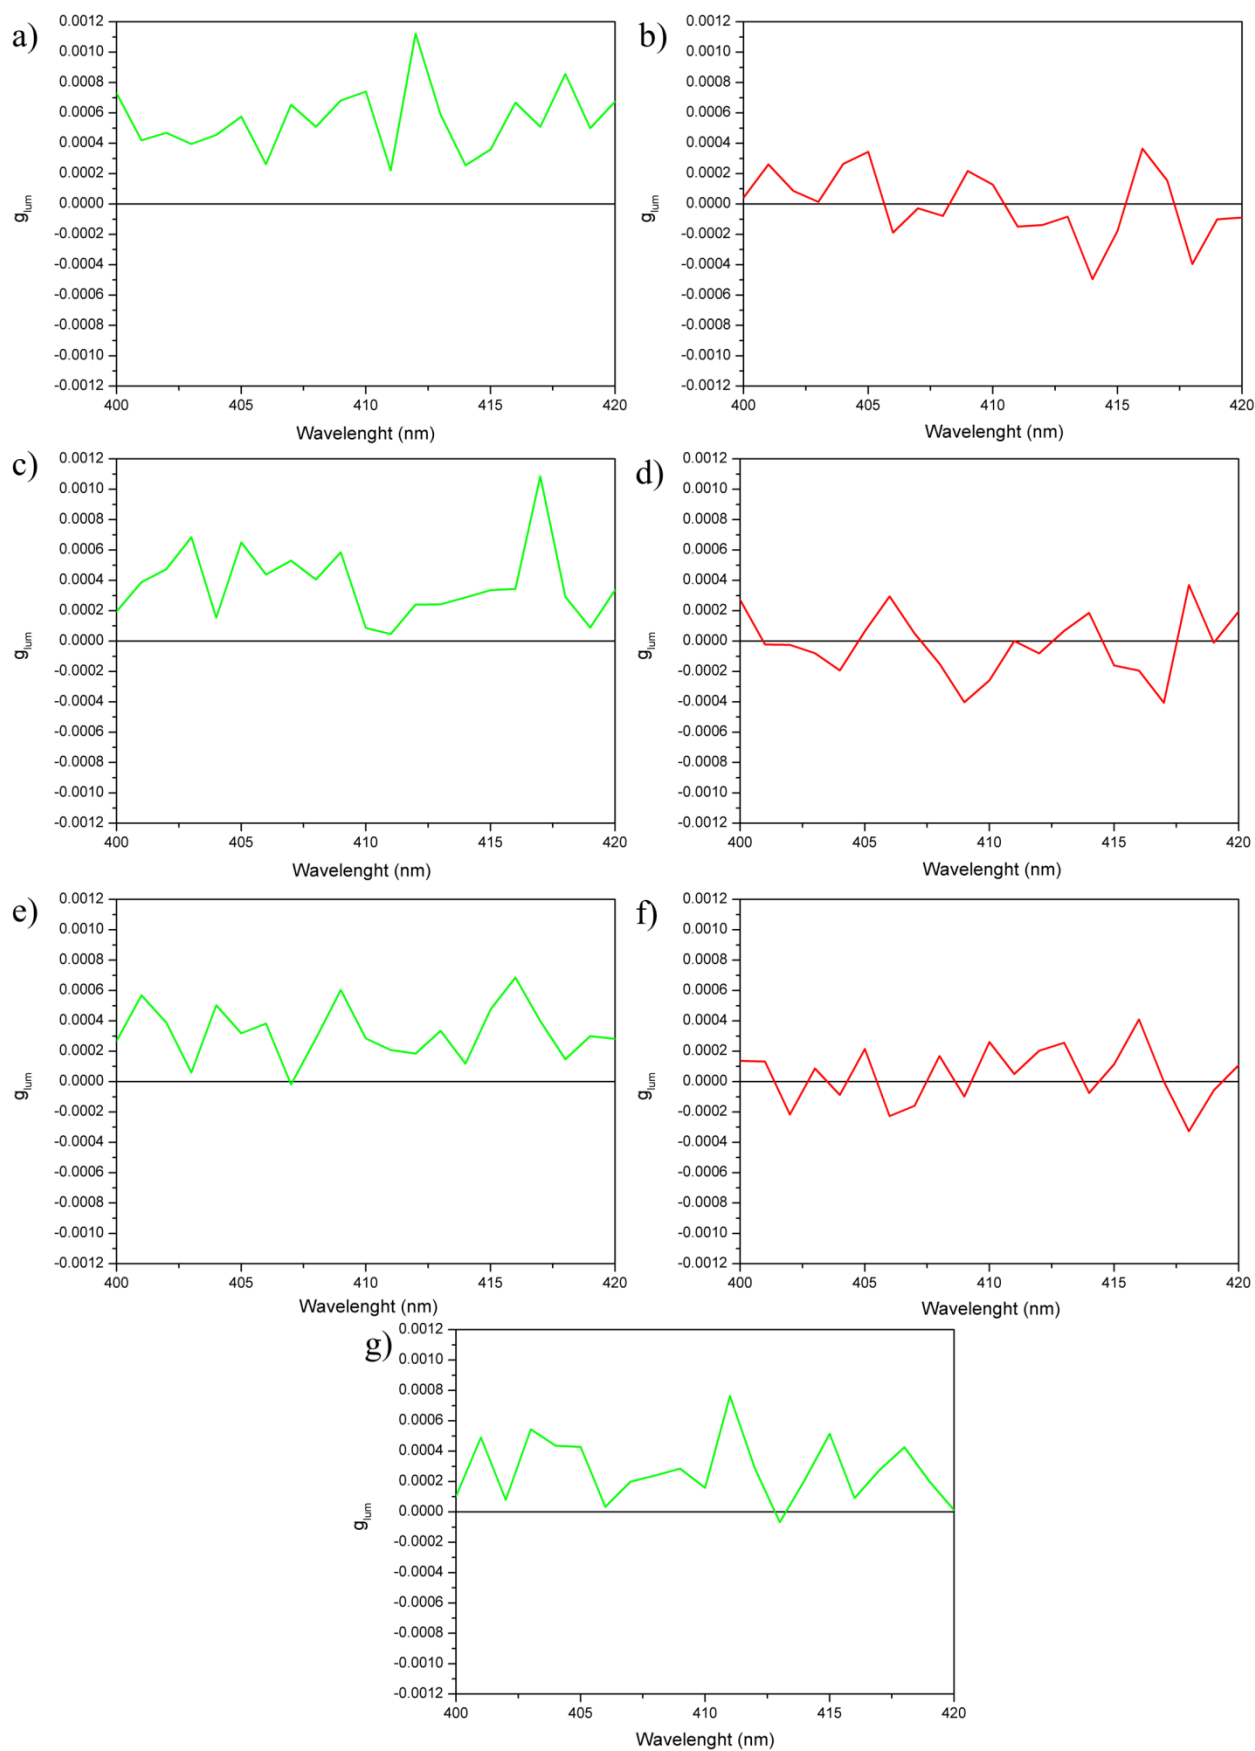

**Figure S104:** *In situ* CPL switching experiment.  $g_{lum}$  ( $\lambda_{exc} = 355$  nm) spectra of rotaxane  $(S)\text{-1-H}^+\cdot 2\text{PF}_6^-$ : (a)  $(S)\text{-1-H}^+\cdot 2\text{PF}_6^-$ ; (b) solution (a) after addition of  $\text{K}_2\text{CO}_3$ ; (c) solution (b) after addition of  $\text{CF}_3\text{CO}_2\text{H}$ ; (d) solution (c) after addition of  $\text{K}_2\text{CO}_3$ ; (e) solution (d) after addition of  $\text{CF}_3\text{CO}_2\text{H}$ ; (f) solution (e) after addition of  $\text{K}_2\text{CO}_3$ ; (g) solution (f) after addition of  $\text{CF}_3\text{CO}_2\text{H}$ .

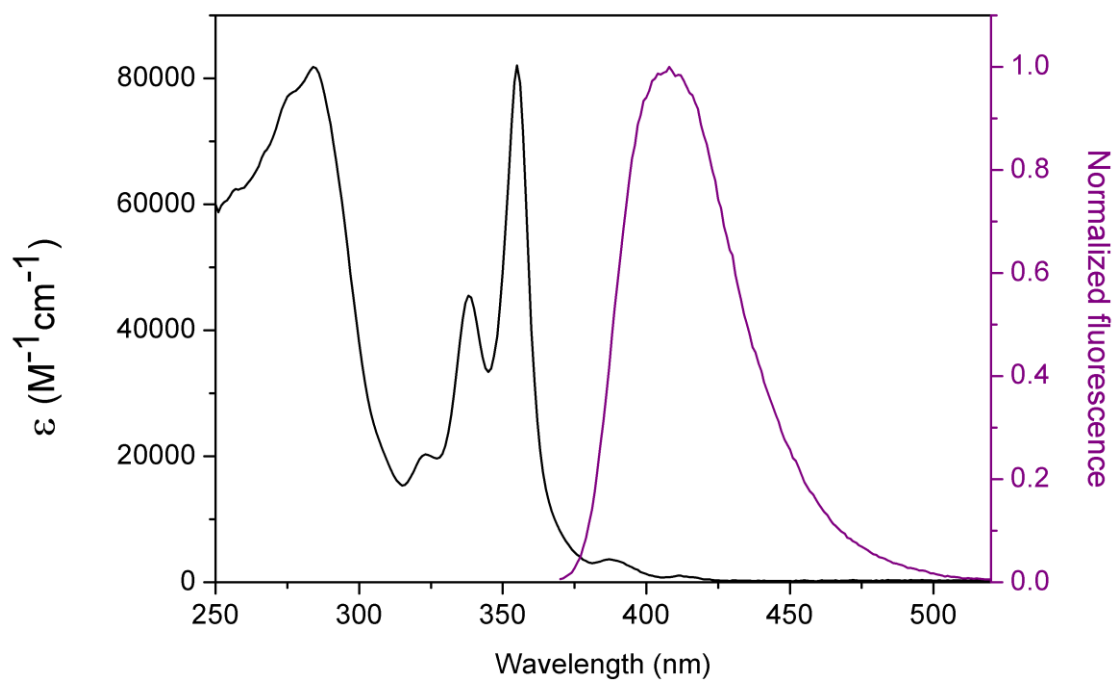

**Figure S105:** UV-Vis absorption (black line) and emission (purple line,  $\lambda_{exc} = 355$  nm) spectra of an equimolar solution of thread (*S*)-**2-H**<sup>+</sup>·2PF<sub>6</sub><sup>-</sup> (ca.  $1 \times 10^{-5}$  M) and macrocycle **8** (ca.  $1 \times 10^{-5}$  M).

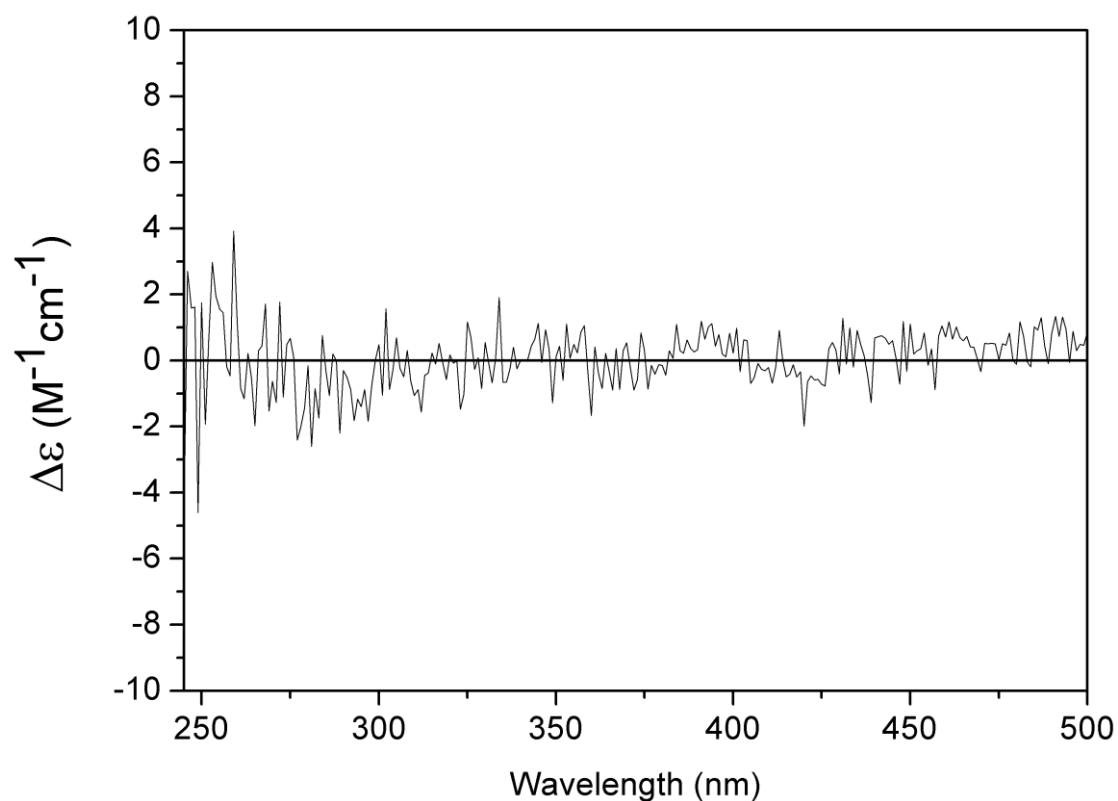

**Figure S106:** ECD spectrum of an equimolar solution of thread (*S*)-**2-H**<sup>+</sup>·2PF<sub>6</sub><sup>-</sup> (ca.  $1 \times 10^{-5}$  M) and macrocycle **8** (ca.  $1 \times 10^{-5}$  M).

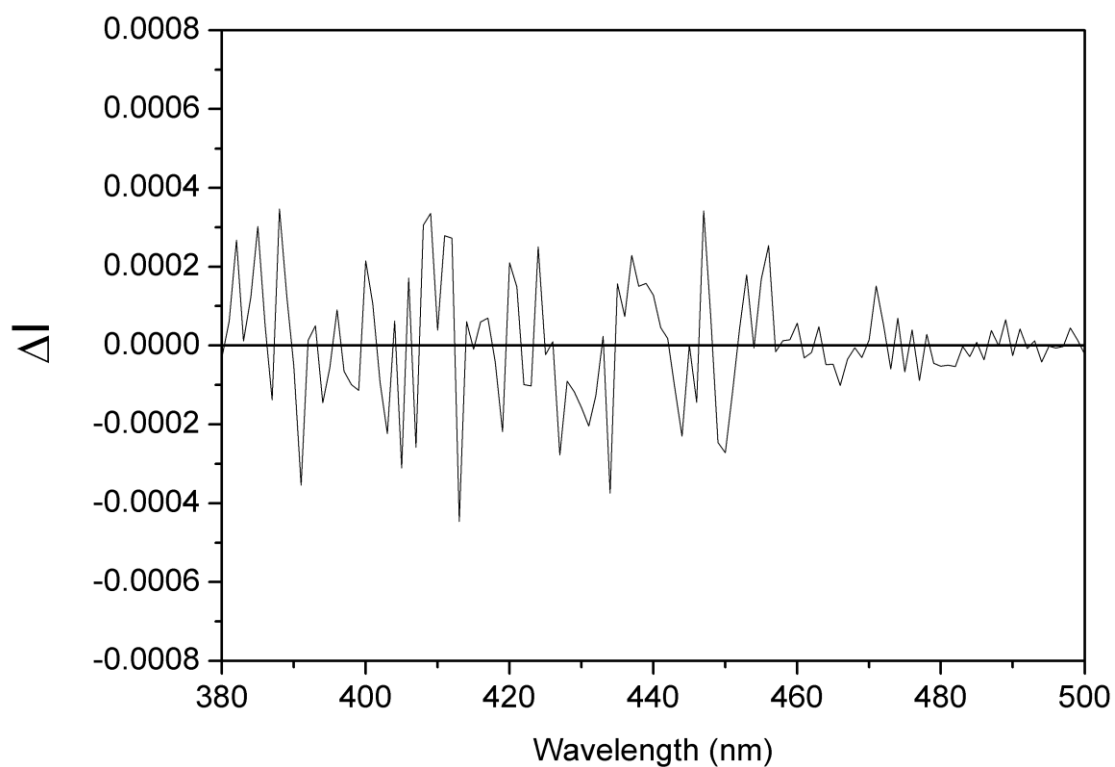

**Figure S107:** CPL ( $\lambda_{exc} = 355$  nm) spectrum of an equimolar solution of thread (*S*)-**2-H**<sup>+</sup>·2PF<sub>6</sub><sup>-</sup> (*ca.*  $1 \times 10^{-5}$  M) and macrocycle **8** (*ca.*  $1 \times 10^{-5}$  M).

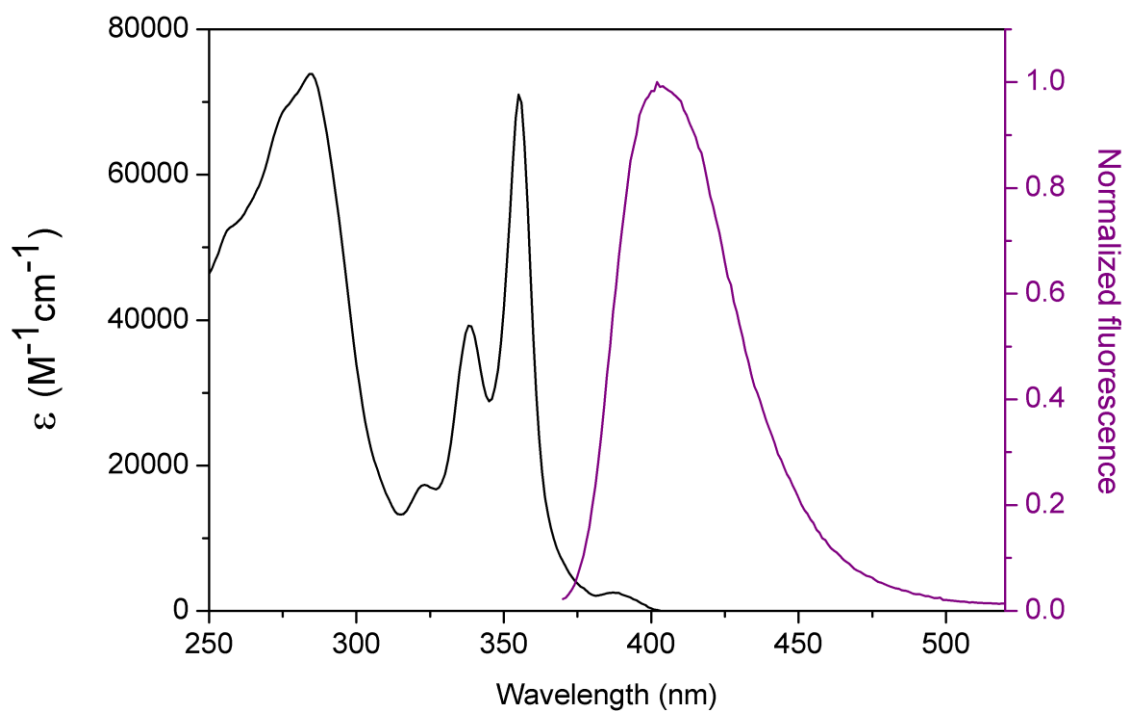

**Figure S108:** UV-Vis absorption (black line) and emission (purple line,  $\lambda_{exc} = 355$  nm) spectra of an equimolar solution of (*S*)-**11-H**<sup>+</sup>·PF<sub>6</sub><sup>-</sup> (*ca.*  $1 \times 10^{-5}$  M) and macrocycle **8** (*ca.*  $1 \times 10^{-5}$  M).

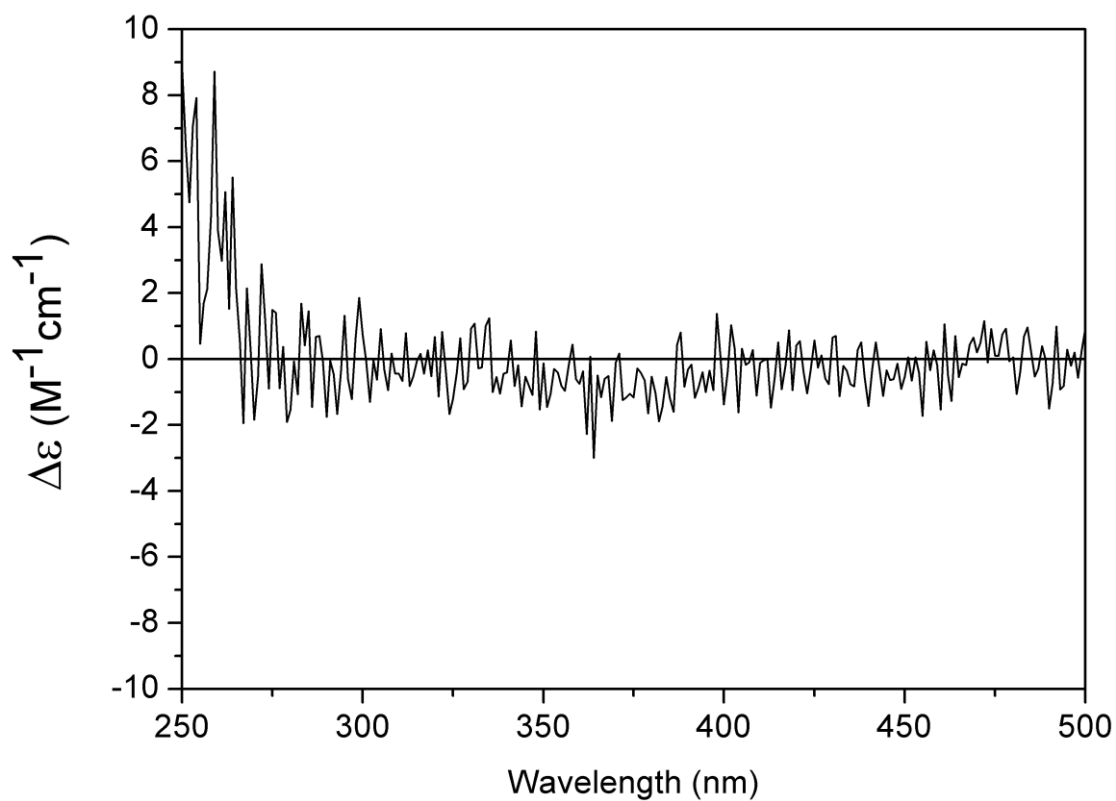

**Figure S109:** ECD spectrum of an equimolar solution of (*S*)-**11-H**<sup>+</sup>·PF<sub>6</sub><sup>-</sup> (*ca.*  $1 \times 10^{-5}$  M) and macrocycle **8** (*ca.*  $1 \times 10^{-5}$  M).

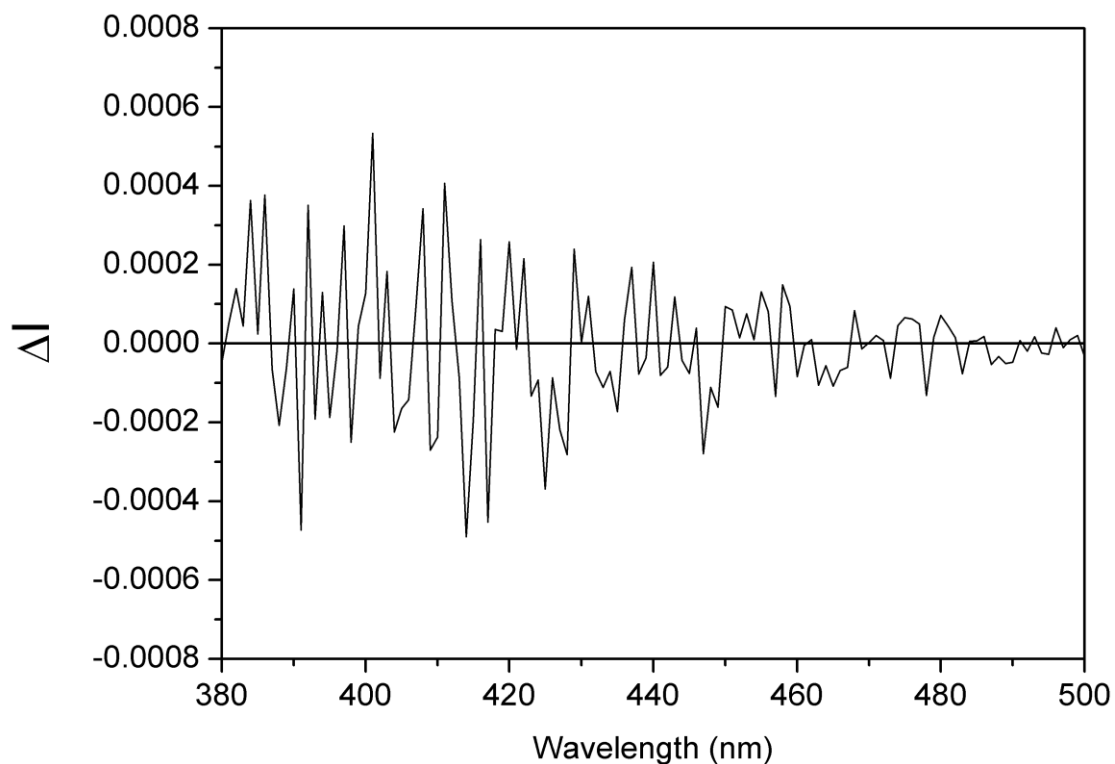

**Figure S110:** CPL ( $\lambda_{exc} = 355$  nm) spectrum of an equimolar solution of (*S*)-**11-H**<sup>+</sup>·PF<sub>6</sub><sup>-</sup> (*ca.*  $1 \times 10^{-5}$  M) and macrocycle **8** (*ca.*  $1 \times 10^{-5}$  M).

## 7. Statistical Analysis of the CPL data

### 7.1. Statistical analysis of the CPL spectra of rotaxane (S)-1

For the statistical analysis of the CPL spectra of (S)-1-H<sup>+</sup>·2PF<sub>6</sub><sup>-</sup>, (S)-1·PF<sub>6</sub><sup>-</sup> and (S)-1-H<sup>+</sup> obtained by reprotonation of (S)-1·PF<sub>6</sub><sup>-</sup> with CF<sub>3</sub>CO<sub>2</sub>H we used the data of non-normalized ΔI (i. e. I<sub>L</sub>-I<sub>R</sub>) as recorded. The different CPL spectra represented in ΔI before normalization are shown in Figure S111. As discussed in section 6, each spectrum is the average of 200 scans.

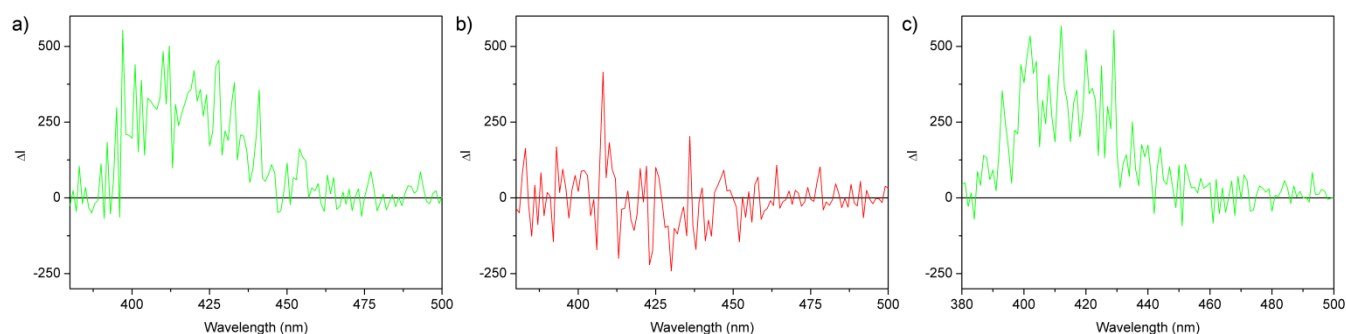

**Figure S111:** CPL ( $\lambda_{\text{exc}} = 355 \text{ nm}$ ) (*ca.*  $1 \times 10^{-5} \text{ M}$ ) spectra in non-normalized  $\Delta I$  scale (CHCl<sub>3</sub>) of: (a) (S)-1-H<sup>+</sup>·2PF<sub>6</sub><sup>-</sup>; (b) (S)-1·PF<sub>6</sub><sup>-</sup>; (c) (S)-1-H<sup>+</sup>, obtained by protonation of 1·PF<sub>6</sub><sup>-</sup> with a solution of CF<sub>3</sub>CO<sub>2</sub>H in CHCl<sub>3</sub>.

In this case, two different approaches were used, one based on the areas of the different spectra and the second one based on the  $\Delta I$  values in a region of 26 nm width around the emission  $\lambda_{\text{max}}$ .

#### 7.1.1. Statistical analysis based on the area

For this approach, we divided the spectra of the 200 scans recorded into 10 groups of 20 scans and calculated the corresponding average areas. With this 10 area values, a mean area and their standard deviations for the spectra of each compound were calculated. The data are shown in Table S3 and Figure S112.

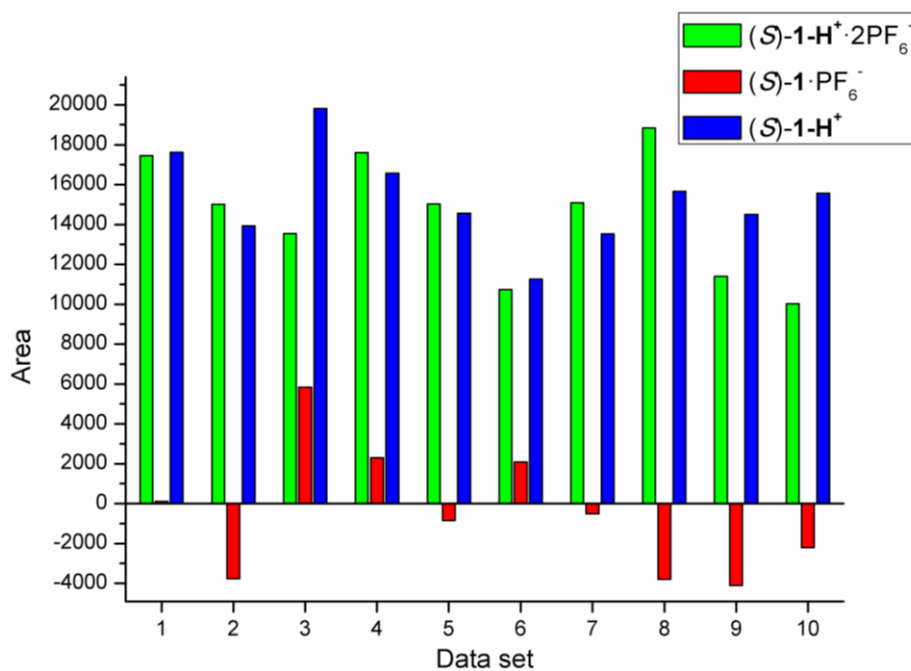

**Figure S112:** Mean areas for the average CPL spectra of each group of 20 scans recorded for (S)-1-H<sup>+</sup>·2PF<sub>6</sub><sup>-</sup>; (S)-1·PF<sub>6</sub><sup>-</sup>; and (S)-1-H<sup>+</sup>, obtained by protonation of 1·PF<sub>6</sub><sup>-</sup> with a solution of CF<sub>3</sub>CO<sub>2</sub>H in CHCl<sub>3</sub>

**Table S3.** Statistic parameters for the areas obtained from CPL spectra

|                            | (S)-1-H <sup>+</sup> ·2PF <sub>6</sub> <sup>-</sup> | (S)-1·PF <sub>6</sub> <sup>-</sup> | (S)-1-H <sup>+</sup> after reprotonation |
|----------------------------|-----------------------------------------------------|------------------------------------|------------------------------------------|
| Average area ( $\bar{x}$ ) | 14469.250                                           | -488.960 <sup>a</sup>              | 15300.45                                 |
| Standard deviation (s)     | 3034.379                                            | 3209.730                           | 2362.28                                  |
| Variance (s <sup>2</sup> ) | 9207455,916                                         | 10302366,673                       | 5580366,798                              |
| Number of data             | 10                                                  | 10                                 | 10                                       |

<sup>a</sup> As the CPL signals can be positive or negative, negative values indicate that the spectra delimits a net area in the negative part of the scale.

- **F-test**

$$F = \frac{s_1^2}{s_2^2} \quad (s_1 > s_2)$$

$H_0 \equiv s_1^2 = s_2^2$  ( $F_{\text{calc}} < F_{\text{tab}}$ )      Variances are not significantly different

$H_1 \equiv s_1^2 \neq s_2^2$  ( $F_{\text{calc}} \geq F_{\text{tab}}$ )      Variances are significantly different

**Table S4.** F-test for the area data<sup>a</sup>

|                                                                                                 | $F_{\text{calc}}$ | Conclusion                                         |
|-------------------------------------------------------------------------------------------------|-------------------|----------------------------------------------------|
| (S)-1-H <sup>+</sup> ·2PF <sub>6</sub> <sup>-</sup> vs (S)-1·PF <sub>6</sub> <sup>-</sup>       | 1.119             | $F_{\text{calc}} < F_{\text{tab}} \rightarrow H_0$ |
| (S)-1·PF <sub>6</sub> <sup>-</sup> vs (S)-1-H <sup>+</sup> after reprotonation                  | 1.846             | $F_{\text{calc}} < F_{\text{tab}} \rightarrow H_0$ |
| (S)-1-H <sup>+</sup> ·2PF <sub>6</sub> <sup>-</sup> vs (S)-1-H <sup>+</sup> after reprotonation | 1.650             | $F_{\text{calc}} < F_{\text{tab}} \rightarrow H_0$ |

<sup>a</sup>  $F_{\text{tab}} (\alpha = 0.05; n_1=n_2= 10; df_1 = df_2 = 9) = 3.18$

Therefore, in all cases is concluded that the variances do not significantly differ.

- **t-test**

$$t = \frac{|\bar{x}_1 - \bar{x}_2|}{s_p \sqrt{\frac{1}{n_1} + \frac{1}{n_2}}} \quad (s_p = \sqrt{\frac{(n_1-1)s_1^2 + (n_2-1)s_2^2}{n_1 + n_2 - 2}})$$

- Comparison between “on” and “off” states

$H_0 \equiv \bar{X}_1 \text{ (on)} \leq \bar{X}_2 \text{ (off)}$  ( $t_{\text{calc}} < t_{\text{tab}}$ )      Means are not significantly different

$H_1 \equiv \bar{X}_1 \text{ (on)} > \bar{X}_2 \text{ (off)}$  ( $t_{\text{calc}} \geq t_{\text{tab}}$ )      Means are significantly different with the “on” state ((S)-1-H<sup>+</sup>) giving a higher signal than the “off” state ((S)-1)

**Table S5.** t-test for the area data of “on” and “off” states<sup>a</sup>

|                                                                                           | $t_{\text{calc}}$ | Conclusion                                         |
|-------------------------------------------------------------------------------------------|-------------------|----------------------------------------------------|
| (S)-1-H <sup>+</sup> ·2PF <sub>6</sub> <sup>-</sup> vs (S)-1·PF <sub>6</sub> <sup>-</sup> | 10.71             | $t_{\text{calc}} > t_{\text{tab}} \rightarrow H_1$ |
| (S)-1·PF <sub>6</sub> <sup>-</sup> vs (S)-1-H <sup>+</sup> after reprotonation            | 12.53             | $t_{\text{calc}} > t_{\text{tab}} \rightarrow H_1$ |

<sup>a</sup>  $t_{\text{tab}}$  (one-tailed, 0.05;  $n_1=n_2= 10; df = 18$ ) = 1.734;  $t_{\text{tab}}$  (one-tailed, 0.001;  $n_1=n_2= 10; df = 18$ ) = 3.610

Therefore, the tests (Tables S4-S5) show that, at 95% confidence, and even at 99.9%, the signals observed for  $(S)\text{-1-H}^+ \cdot 2\text{PF}_6^-$  (“on I” state) and  $(S)\text{-1-H}^+$  obtained by protonation of  $\text{1} \cdot \text{PF}_6^-$  with a solution of  $\text{CF}_3\text{CO}_2\text{H}$  (“on II” state) are significantly higher from the signals of  $(S)\text{-1} \cdot \text{PF}_6^-$  (“off” state).

- Comparison between “on” states

We also compared the signals of  $(S)\text{-1-H}^+ \cdot 2\text{PF}_6^-$  and  $(S)\text{-1-H}^+$  after reprotonation with  $\text{CF}_3\text{CO}_2\text{H}$ .

$H_0 \equiv \bar{X}_1 = \bar{X}_2$  ( $t_{\text{calc}} < t_{\text{tab}}$ ) Means are not significantly different

$H_1 \equiv \bar{X}_1 \neq \bar{X}_2$  ( $t_{\text{calc}} \geq t_{\text{tab}}$ ) Means are significantly different

**Table S6.** t-test for the area data of  $(S)\text{-1-H}^+ \cdot 2\text{PF}_6^-$  and reprotonated  $(S)\text{-1-H}^+$

|                                                                                   | $t_{\text{calc}}$ | Conclusion                                         |
|-----------------------------------------------------------------------------------|-------------------|----------------------------------------------------|
| $(S)\text{-1-H}^+ \cdot 2\text{PF}_6^-$ vs $(S)\text{-1-H}^+$ after reprotonation | 0.68              | $t_{\text{calc}} < t_{\text{tab}} \rightarrow H_0$ |

<sup>a</sup>  $t_{\text{tab}}$  (two-tailed, 0.05;  $n_1=n_2=10$ ;  $df=18$ ) = 2.101;  $t_{\text{tab}}$  (two-tailed, 0.001;  $n_1=n_2=10$ ;  $df=18$ ) = 3.922

On the contrary, at the same level of confidence as the comparison between “on” and “off states” there are no significant differences between the signals of both “on” states ( $(S)\text{-1-H}^+ \cdot 2\text{PF}_6^-$  and reprotonated  $(S)\text{-1-H}^+$ ) (Table S6).

If we assume that due to the degradation, the signal of  $(S)\text{-1-H}^+$  after reprotonation can only diminish due to the degradation, then  $H_1 \equiv \bar{X}_1 > \bar{X}_2$ , and a one-tailed test would be the appropriate and the reference t values shown in table S5 would have to be considered. However, the conclusion of the test would remain unaltered.

### 7.1.1. Statistical analysis based on the intensity

For this approach, we analyzed the non-normalized  $\Delta I$  values between 400 and 425 nm (26 points). The data are shown in Figure S113 and Table S7.

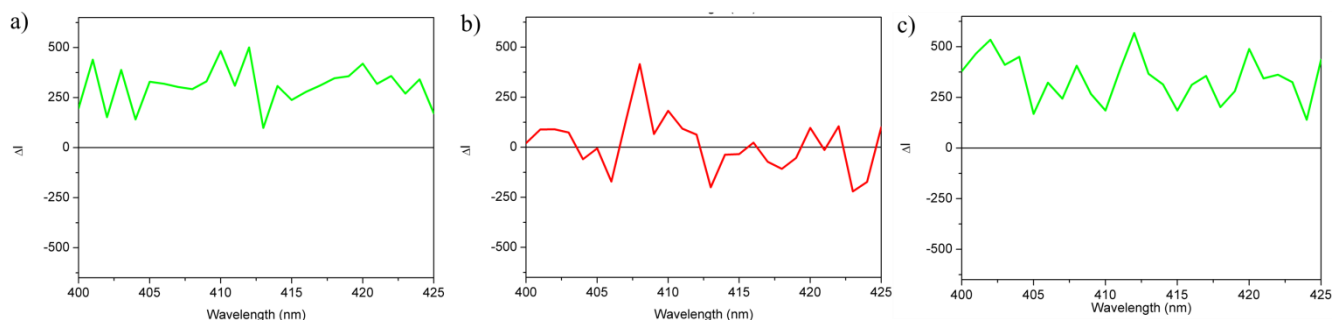

**Figure S113:** Partial CPL ( $\lambda_{\text{exc}} = 355$  nm) (*ca.*  $1 \times 10^{-5}$  M) spectra in non-normalized  $\Delta I$  scale ( $\text{CHCl}_3$ ) of: (a)  $(S)\text{-1-H}^+ \cdot 2\text{PF}_6^-$ ; (b)  $(S)\text{-1} \cdot \text{PF}_6^-$ ; (c)  $(S)\text{-1-H}^+$ , obtained by protonation of  $(S)\text{-1} \cdot \text{PF}_6^-$  with a solution of  $\text{CF}_3\text{CO}_2\text{H}$  in  $\text{CHCl}_3$ .

**Table S7.** Statistic parameters for the non-normalized  $\Delta I$  values obtained from CPL spectra

|                                  | $(S)\text{-1-H}^+ \cdot 2\text{PF}_6^-$ | $(S)\text{-1} \cdot \text{PF}_6^-$ | $(S)\text{-1-H}^+$ after reprotonation |
|----------------------------------|-----------------------------------------|------------------------------------|----------------------------------------|
| Average $\Delta I$ ( $\bar{X}$ ) | 308.08                                  | 15.39                              | 342.34                                 |
| Standard deviation (s)           | 97.56                                   | 132.92                             | 110.97                                 |
| Variance ( $s^2$ )               | 9517.387                                | 17668.095                          | 12315.404                              |
| Number of data                   | 26                                      | 26                                 | 26                                     |

- **F-test**

$$F = \frac{s_1^2}{s_2^2} \quad (s_1 > s_2)$$

$$H_0 \equiv s_1^2 = s_2^2 \quad (F_{\text{calc}} < F_{\text{tab}}) \quad \text{Variances are not significantly different}$$

$$H_1 \equiv s_1^2 \neq s_2^2 \quad (F_{\text{calc}} \geq F_{\text{tab}}) \quad \text{Variances are significantly different}$$

**Table S8.** F-test for the  $\Delta I$  data<sup>a</sup>

|                                                                                                            | $F_{\text{calc}}$ | Conclusion                                         |
|------------------------------------------------------------------------------------------------------------|-------------------|----------------------------------------------------|
| $(S)\text{-1}\cdot\mathbf{H}^+\cdot 2\text{PF}_6^-$ vs $(S)\text{-1}\cdot\text{PF}_6^-$                    | 1.856             | $F_{\text{calc}} < F_{\text{tab}} \rightarrow H_0$ |
| $(S)\text{-1}\cdot\text{PF}_6^-$ vs $(S)\text{-1}\cdot\mathbf{H}^+$ after reprotonation                    | 1.435             | $F_{\text{calc}} < F_{\text{tab}} \rightarrow H_0$ |
| $(S)\text{-1}\cdot\mathbf{H}^+\cdot 2\text{PF}_6^-$ vs $(S)\text{-1}\cdot\mathbf{H}^+$ after reprotonation | 1.294             | $F_{\text{calc}} < F_{\text{tab}} \rightarrow H_0$ |

$$^a F_{\text{tab}} (\alpha = 0.05; n_1=n_2= 26; df_1 = df_2 = 25) = 1.96$$

Therefore, in all cases is concluded that the variances do not significantly differ.

- **t-test**

$$t = \frac{|\bar{x}_1 - \bar{x}_2|}{s_p \sqrt{\frac{1}{n_1} + \frac{1}{n_2}}} \quad (s_p = \sqrt{\frac{(n_1-1)s_1^2 + (n_2-1)s_2^2}{n_1 + n_2 - 2}})$$

- Comparison between “on” and “off” states

$$H_0 \equiv \bar{X}_1 (\text{on}) \leq \bar{X}_2 (\text{off}) \quad (t_{\text{calc}} < t_{\text{tab}}) \quad \text{Means are not significantly different}$$

$$H_1 \equiv \bar{X}_1 (\text{on}) > \bar{X}_2 (\text{off}) \quad (t_{\text{calc}} \geq t_{\text{tab}}) \quad \text{Means are significantly different with the “on” state } ((S)\text{-1}\cdot\mathbf{H}^+) \text{ giving a higher signal that the “off” state } ((S)\text{-1})$$

As we are comparing the data of the different  $(S)\text{-1}$  species, we consider the signal of the “on” state positive and higher than that of the “off” state.

**Table S9.** t-test for the  $\Delta I$  data of “on” and “off” states<sup>a</sup>

|                                                                                         | $t_{\text{calc}}$ | Conclusion                                         |
|-----------------------------------------------------------------------------------------|-------------------|----------------------------------------------------|
| $(S)\text{-1}\cdot\mathbf{H}^+\cdot 2\text{PF}_6^-$ vs $(S)\text{-1}\cdot\text{PF}_6^-$ | 9.05              | $t_{\text{calc}} > t_{\text{tab}} \rightarrow H_1$ |
| $(S)\text{-1}\cdot\text{PF}_6^-$ vs $(S)\text{-1}\cdot\mathbf{H}^+$ after reprotonation | 9.63              | $t_{\text{calc}} > t_{\text{tab}} \rightarrow H_1$ |

$$^a t_{\text{tab}} (\text{one-tailed}, 0.05; n_1=n_2= 26; df = 50) = 1.676; t_{\text{tab}} (\text{one-tailed}, 0.001; n_1=n_2= 26; df = 50) = 3.262$$

Therefore, the tests based on  $\Delta I$  (tables S8-S9) bring the same conclusions than those based on the areas of the spectra. At 95% and even at 99.9% confidence level, the signal observed for  $(S)\text{-1}\cdot\text{PF}_6^-$  (“off” state) is significantly different from the signals of  $(S)\text{-1}\cdot\mathbf{H}^+\cdot 2\text{PF}_6^-$  (“on I” state) and  $(S)\text{-1}\cdot\mathbf{H}^+$  obtained by protonation of  $(S)\text{-1}\cdot\text{PF}_6^-$  with a solution of  $\text{CF}_3\text{CO}_2\text{H}$  (“on II” state).

- Comparison between “on” states

$$H_0 \equiv \bar{X}_1 = \bar{X}_2 \quad (t_{\text{calc}} < t_{\text{tab}}) \quad \text{Means are not significantly different}$$

$$H_1 \equiv \bar{X}_1 \neq \bar{X}_2 \quad (t_{\text{calc}} \geq t_{\text{tab}}) \quad \text{Means are significantly different}$$



**Table S10.** t-test for the  $\Delta I$  data of  $(S)\text{-1-H}^+ \cdot 2\text{PF}_6^-$  and reprotonated  $(S)\text{-1-H}^+$ 

|                                                                                   | $t_{\text{calc}}$ | Conclusion                                         |
|-----------------------------------------------------------------------------------|-------------------|----------------------------------------------------|
| $(S)\text{-1-H}^+ \cdot 2\text{PF}_6^-$ vs $(S)\text{-1-H}^+$ after reprotonation | 1.18              | $t_{\text{calc}} < t_{\text{tab}} \rightarrow H_0$ |

<sup>a</sup>  $t_{\text{tab}}$  (two-tailed, 0.05;  $n_1=n_2=26$ ;  $df=50$ ) = 2.009;  $t_{\text{tab}}$  (two-tailed, 0.001;  $n_1=n_2=26$ ;  $df=50$ ) = 3.497

On the contrary, there are no significant differences between the signals of both “on” states ( $(S)\text{-1-H}^+ \cdot 2\text{PF}_6^-$  and reprotonated  $(S)\text{-1-H}^+$ ) (Table S10).

If we assume that due to the degradation, the signal of  $(S)\text{-1-H}^+$  after reprotonation can only diminish due to the degradation, then  $H_1 \equiv \bar{X}_1 > \bar{X}_2$ , and a one-tailed test would be the appropriate and the reference t values shown in table S9 would have to be considered. However, the conclusion of the test would remain unaltered.

## 7.2. Statistical analysis of the CPL data of the operation cycles

Finally, we performed the statistical analysis of the CPL data obtained during the cycles of *in situ* switching of the CPL response. Having obtained the same conclusions either using areas or non-normalized  $\Delta I$  intensities for  $(S)\text{-1-H}^+ \cdot 2\text{PF}_6^-$ ,  $(S)\text{-1-PF}_6^-$  and reprotonated  $(S)\text{-1-H}^+$ , we used the non-normalized  $\Delta I$  data between 400 and 420 nm (21 points). The data are shown in Table S11 and Figure S114.

**Table S11.** Statistic parameters for the non-normalized  $\Delta I$  values obtained from CPL spectra

|                                                                | Average $\Delta I$ ( $\bar{x}$ ) | Standard deviation (s) | Variance ( $s^2$ ) | Number of data |
|----------------------------------------------------------------|----------------------------------|------------------------|--------------------|----------------|
| $(S)\text{-1-H}^+ \cdot 2\text{PF}_6^-$ (Cycle 0) <sup>a</sup> | 366.998                          | 136.348                | 18590.7588         | 21             |
| $(S)\text{-1-PF}_6^-$ (Cycle 0.5) <sup>a</sup>                 | 1.725                            | 131.501                | 17292.6318         | 21             |
| $(S)\text{-1-H}^+$ (Cycle 1) <sup>a</sup>                      | 236.414                          | 146.668                | 21511.3817         | 21             |
| $(S)\text{-1}$ (Cycle 1.5) <sup>a</sup>                        | -15.402                          | 122.639                | 15040.3481         | 21             |
| $(S)\text{-1-H}^+$ (Cycle 2) <sup>a</sup>                      | 198.093                          | 108.888                | 11856.5789         | 21             |
| $(S)\text{-1}$ (Cycle 2.5) <sup>a</sup>                        | 26.115                           | 111.771                | 12492.8418         | 21             |
| $(S)\text{-1-H}^+$ (Cycle 3) <sup>a</sup>                      | 160.206                          | 121.127                | 14671.6321         | 21             |

<sup>a</sup> The cycle number corresponds to that shown in Figure 7 in the main text.

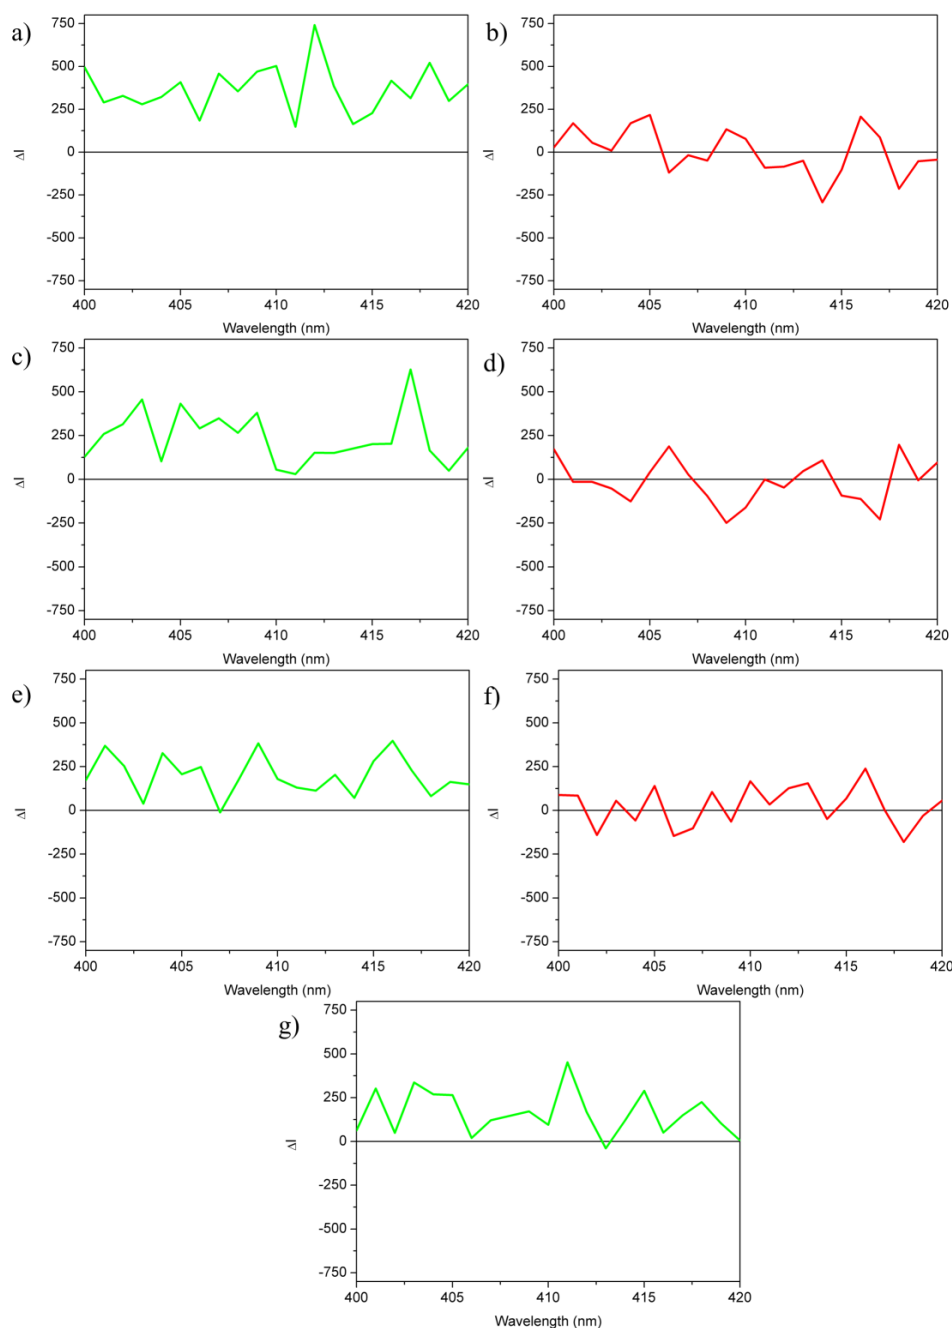

**Figure S114:** *In situ* CPL switching experiment. Non-normalized  $\Delta I$  spectra of rotaxane  $(S)\text{-1-H}^+\cdot 2\text{PF}_6^-$ : (a)  $(S)\text{-1-H}^+\cdot 2\text{PF}_6^-$ ; (b) solution (a) after addition of  $\text{K}_2\text{CO}_3$ ; (c) solution (b) after addition of  $\text{CF}_3\text{CO}_2\text{H}$ ; (d) solution (c) after addition of  $\text{K}_2\text{CO}_3$ ; (e) solution (d) after addition of  $\text{CF}_3\text{CO}_2\text{H}$ ; (f) solution (e) after addition of  $\text{K}_2\text{CO}_3$ ; (g) solution (f) after addition of  $\text{CF}_3\text{CO}_2\text{H}$

- **F-test**

$$F = \frac{s_1^2}{s_2^2} \quad (s_1 > s_2)$$

$H_0 \equiv s_1^2 = s_2^2$  ( $F_{\text{calc}} < F_{\text{tab}}$ )      Variances are not significantly different

$H_1 \equiv s_1^2 \neq s_2^2$  ( $F_{\text{calc}} \geq F_{\text{tab}}$ )      Variances are significantly different

**Table S12.** F-test for the cycles  $\Delta I$  data<sup>a</sup>

| “on” state vs “off” state | $F_{calc}$ | Conclusion                           |
|---------------------------|------------|--------------------------------------|
| Cycle 0 vs Cycle 0.5      | 1.075      | $F_{calc} < F_{tab} \rightarrow H_0$ |
| Cycle 0.5 vs Cycle 1      | 1.244      | $F_{calc} < F_{tab} \rightarrow H_0$ |
| Cycle 1 vs Cycle 1.5      | 1.430      | $F_{calc} < F_{tab} \rightarrow H_0$ |
| Cycle 1.5 vs Cycle 2      | 1.269      | $F_{calc} < F_{tab} \rightarrow H_0$ |
| Cycle 2 vs Cycle 2.5      | 1.054      | $F_{calc} < F_{tab} \rightarrow H_0$ |
| Cycle 2.5 vs Cycle 3      | 1.174      | $F_{calc} < F_{tab} \rightarrow H_0$ |

<sup>a</sup>  $F_{tab} (\alpha = 0.05; n_1=n_2= 21; df_1 = df_2 = 20) = 2.12$

Therefore, in all cases is concluded that the variances do not significantly differ.

- **t-test**

$$t = \frac{|\bar{x}_1 - \bar{x}_2|}{s_p \sqrt{\frac{1}{n_1} + \frac{1}{n_2}}} \quad (s_p = \sqrt{\frac{(n_1-1)s_1^2 + (n_2-1)s_2^2}{n_1 + n_2 - 2}})$$

$H_0 \equiv \bar{X}_1 \text{ (on)} \leq \bar{X}_2 \text{ (off)} \quad (t_{calc} < t_{tab}) \quad \text{Means are not significantly different}$

$H_1 \equiv \bar{X}_1 \text{ (on)} > \bar{X}_2 \text{ (off)} \quad (t_{calc} \geq t_{tab}) \quad \text{Means are significantly different with the “on” states giving a higher signal that the “off” states}$

**Table S13.** t-test for the cycles  $\Delta I$  data<sup>a</sup>

| “on” state vs “off” state | $t_{calc}$ | Conclusion                           |
|---------------------------|------------|--------------------------------------|
| Cycle 0 vs Cycle 0.5      | 8.84       | $t_{calc} > t_{tab} \rightarrow H_1$ |
| Cycle 0.5 vs Cycle 1      | 5.46       | $t_{calc} > t_{tab} \rightarrow H_1$ |
| Cycle 1 vs Cycle 1.5      | 6.04       | $t_{calc} > t_{tab} \rightarrow H_1$ |
| Cycle 1.5 vs Cycle 2      | 5.97       | $t_{calc} > t_{tab} \rightarrow H_1$ |
| Cycle 2 vs Cycle 2.5      | 5.05       | $t_{calc} > t_{tab} \rightarrow H_1$ |
| Cycle 2.5 vs Cycle 3      | 3.73       | $t_{calc} > t_{tab} \rightarrow H_1$ |

<sup>a</sup>  $t_{tab} \text{ (one-tailed, 0.05; } n_1=n_2= 21; df = 40) = 1.684; t_{tab} \text{ (one-tailed, 0.001; } n_1=n_2= 21; df = 40) = 3.307$

Therefore, the tests performed (Tables S12-S13) show that at 95%, and even 99.9%, confidence level, the signals observed for different “on” states (cycle 0, 1, 2 and 3) is significantly higher than those corresponding to the “off” states (cycle 0.5, 1.5 and 2.5). Therefore, although there is a degradation of the system among these cycles, the clear difference between both CPL response states is maintained.

## 8. Single crystal X-ray diffraction analysis

Suitable crystals for X-ray diffraction analysis of **8**-KPF<sub>6</sub> were grown by slow evaporation of a solution of the complex in CHCl<sub>3</sub>. The diffraction data were collected on a Bruker SMART APEX diffractometer equipped with an APEX detector using a Mo radiation source. The structure was solved with SHELXT<sup>S15</sup> 2018 and refined using the full-matrix least-squares against  $F^2$  procedure with SHELX 2018<sup>S16</sup> using the WinGX32<sup>S17</sup> software. C–H hydrogen atoms were placed in idealized positions ( $U_{\text{eg}}(\text{H}) = 1.2U_{\text{eg}}(\text{C})$  or  $U_{\text{eg}}(\text{H}) = 1.5U_{\text{eg}}(\text{C})$ ) and were allowed to ride on their parent atoms.

The crystals obtained were of moderate quality, which, together with its low stability at low temperature that forced to collect the data at room temperature, meant that several restraints had to be used for some atom groups, especially for the PF<sub>6</sub> counterion. Hence, DANG, SADI, ISOR restraints had to be used. Moreover, for this PF<sub>6</sub> anion, some apparent disorder between two positions was found, which resulted in the use of PART instructions.

During the refinement the structure of the target molecule was established, but large residual electron density was still present. This electron density was located mainly in the void and corresponded to a disordered chloroform molecule, which could not be fully modeled. Therefore, the SQUEEZE<sup>S18</sup> routine included in PLATON<sup>S19</sup> was applied and a density of 446 e<sup>-</sup>/cell in an approximate 1476 Å<sup>3</sup> volume was identified. Eight chloroform molecules per unit cell were introduced in the formula. This density was removed and the data refined against the model.

Summary of the X-ray diffraction measurement and refinement data: Chemical formula, C<sub>52</sub>H<sub>46</sub>Cl<sub>6</sub>F<sub>6</sub>KO<sub>8</sub>P; *Mr*, 1195.66; crystal size [mm<sup>3</sup>], 0.460 × 0.340 × 0.200; temperature, 293(2) K; wavelength [Å], 0.71073 (Mo K $\alpha$ ), crystal system, monoclinic; space group, *C2/c*; *a* [Å], 13.3866(12); *b* [Å], 22.472(2); *c* [Å], 18.1039(17);  $\alpha$  [°], 90;  $\beta$  [°], 99.497(2);  $\gamma$  [°], 90; *V* [Å<sup>3</sup>], 5371.3(9); *Z*, 4;  $\rho_{\text{calcd}}$  [Mg m<sup>-3</sup>], 1.479;  $\mu$  [mm<sup>-1</sup>], 0.501; F(000), 2448;  $\theta$  range [°], 1.789 to 28.053; *hkl* ranges, -17/17, -29/16, -23/23; reflections collected, 16688; independent reflections, 6016; *R*<sub>int</sub>, 0.0241; completeness to  $\theta = 25.242^\circ$ , 99.9%; absorption correction, semi-empirical from equivalents; refinement method; full-matrix least-squares on  $F^2$ ; Final *R* indices [ $I > 2\sigma(I)$ ], *R*<sub>1</sub> = 0.1142, *wR*<sub>2</sub> = 0.3619; *R* indices (all data), *R*<sub>1</sub> = 0.1546, *wR*<sub>2</sub> = 0.4004; goodness-of-fit on  $F^2$ , 1.343.

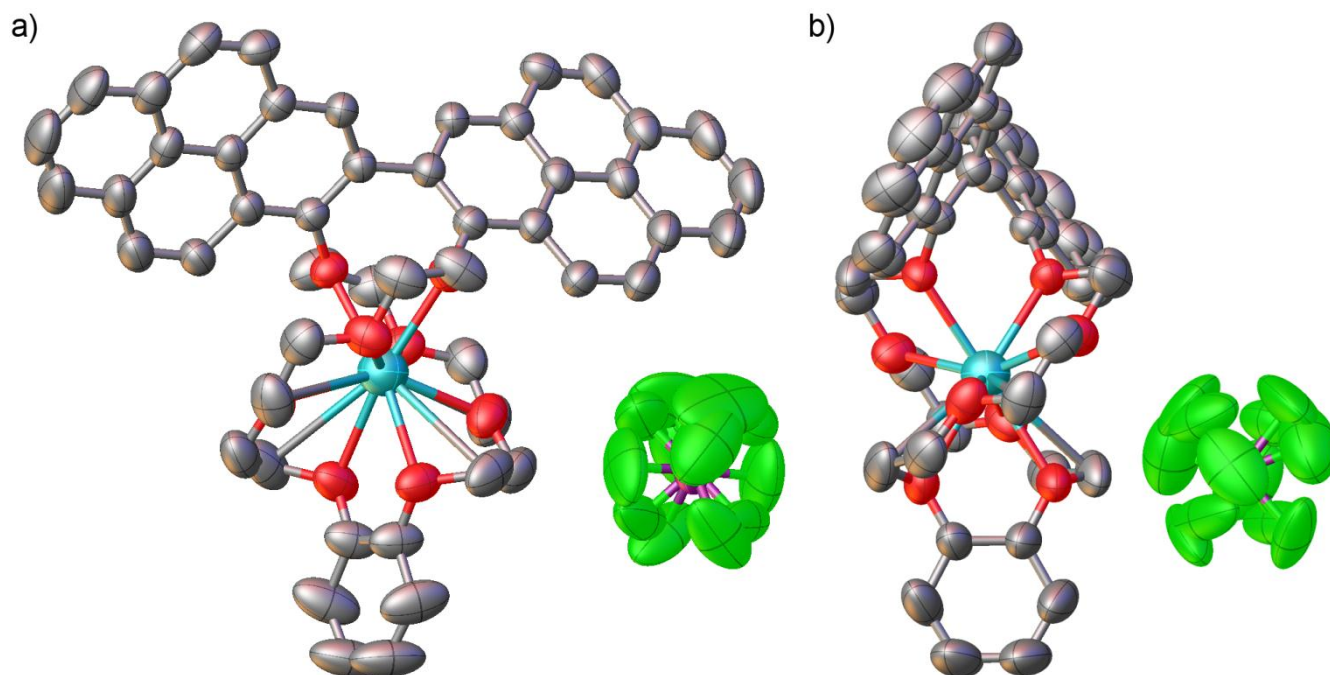

**Figure S115.** (a) Front and (b) side views of the ORTEP-type<sup>S20</sup> representation of the solid state structure of **8**-KPF<sub>6</sub> showing the ellipsoids at 50% probability: a) Color code: C: gray, O: red, K: light blue, P: violet, Cl: green. Hydrogen atoms have been omitted for clarity.

**Table S14.** Atomic coordinates for the X-ray diffraction structure of **8C**KPF<sub>6</sub>

| Atom | X       | Y       | Z       |   |         |         |         |
|------|---------|---------|---------|---|---------|---------|---------|
|      |         |         |         | C | -2.7967 | 3.3798  | 12.9651 |
| C    | -0.6977 | 12.2915 | 12.9490 | H | -3.1215 | 2.5570  | 12.6175 |
| C    | -1.6501 | 13.3232 | 12.9365 | O | -0.8636 | 11.2072 | 13.7814 |
| C    | -1.4775 | 14.3924 | 12.0651 | O | -1.8343 | 9.7980  | 15.8222 |
| H    | -2.1029 | 15.1070 | 12.0814 | O | -4.0142 | 8.4459  | 14.9131 |
| C    | -0.4017 | 14.4450 | 11.1634 | O | -3.3557 | 6.9497  | 12.6256 |
| C    | 0.5407  | 13.3913 | 11.1795 | K | -2.2403 | 9.1845  | 13.3918 |
| C    | 0.4055  | 12.3230 | 12.0759 | C | -3.7829 | 12.2915 | 13.8347 |
| C    | 1.4111  | 11.2931 | 12.0901 | C | -2.8305 | 13.3232 | 13.8472 |
| H    | 1.3452  | 10.5793 | 12.7140 | C | -3.0031 | 14.3924 | 14.7185 |
| C    | 2.4548  | 11.3326 | 11.2206 | H | -2.3777 | 15.1070 | 14.7022 |
| H    | 3.1186  | 10.6537 | 11.2523 | C | -4.0789 | 14.4450 | 15.6202 |
| C    | 2.5654  | 12.3933 | 10.2474 | C | -5.0213 | 13.3913 | 15.6042 |
| C    | 3.5952  | 12.4405 | 9.2850  | C | -4.8861 | 12.3230 | 14.7078 |
| H    | 4.2571  | 11.7589 | 9.2742  | C | -5.8917 | 11.2931 | 14.6935 |
| C    | 3.6585  | 13.4472 | 8.3708  | H | -5.8258 | 10.5793 | 14.0697 |
| H    | 4.3520  | 13.4479 | 7.7229  | C | -6.9354 | 11.3326 | 15.5631 |
| C    | 2.7543  | 14.4338 | 8.3744  | H | -7.5992 | 10.6537 | 15.5314 |
| H    | 2.8316  | 15.1301 | 7.7333  | C | -7.0460 | 12.3933 | 16.5362 |
| C    | 1.6952  | 14.4720 | 9.2957  | C | -8.0758 | 12.4405 | 17.4987 |
| C    | 1.6074  | 13.4234 | 10.2206 | H | -8.7377 | 11.7589 | 17.5094 |
| C    | 0.7269  | 15.5034 | 9.3064  | C | -8.1391 | 13.4472 | 18.4129 |
| H    | 0.7710  | 16.1939 | 8.6557  | H | -8.8326 | 13.4479 | 19.0608 |
| C    | -0.2343 | 15.5169 | 10.2028 | C | -7.2349 | 14.4338 | 18.4093 |
| H    | -0.8374 | 16.2505 | 10.2202 | H | -7.3122 | 15.1301 | 19.0504 |
| C    | -0.1983 | 11.2652 | 15.0453 | C | -6.1758 | 14.4720 | 17.4879 |
| H    | 0.2080  | 12.1608 | 15.1663 | C | -6.0880 | 13.4234 | 16.5630 |
| H    | 0.5263  | 10.5922 | 15.0718 | C | -5.2075 | 15.5034 | 17.4772 |
| C    | -1.1311 | 11.0135 | 16.1077 | H | -5.2516 | 16.1939 | 18.1280 |
| H    | -0.6488 | 10.9302 | 16.9676 | C | -4.2463 | 15.5169 | 16.5809 |
| H    | -1.7717 | 11.7642 | 16.1799 | H | -3.6432 | 16.2505 | 16.5634 |
| C    | -2.9662 | 9.5978  | 16.6505 | C | -4.2823 | 11.2652 | 11.7384 |
| H    | -3.5826 | 10.3686 | 16.5606 | H | -4.6886 | 12.1608 | 11.6174 |
| H    | -2.6797 | 9.5433  | 17.5966 | H | -5.0069 | 10.5922 | 11.7119 |
| C    | -3.6418 | 8.4045  | 16.2880 | C | -3.3495 | 11.0135 | 10.6760 |
| H    | -4.4512 | 8.2982  | 16.8480 | H | -3.8318 | 10.9302 | 9.8161  |
| H    | -3.0508 | 7.6272  | 16.4495 | H | -2.7090 | 11.7642 | 10.6037 |
| C    | -4.8135 | 7.3551  | 14.5221 | C | -1.5144 | 9.5978  | 10.1332 |
| H    | -5.7530 | 7.5063  | 14.7966 | H | -0.8980 | 10.3686 | 10.2230 |
| H    | -4.4920 | 6.5247  | 14.9571 | H | -1.8009 | 9.5433  | 9.1870  |
| C    | -4.7258 | 7.2203  | 13.0133 | C | -0.8388 | 8.4045  | 10.4956 |
| H    | -5.3113 | 6.4815  | 12.7082 | H | -0.0294 | 8.2982  | 9.9356  |
| H    | -5.0360 | 8.0568  | 12.5841 | H | -1.4298 | 7.6272  | 10.3342 |
| C    | -2.8371 | 5.7753  | 13.0061 | C | 0.3329  | 7.3551  | 12.2616 |
| C    | -3.4111 | 4.5259  | 12.6365 | H | 1.2724  | 7.5063  | 11.9870 |
| H    | -4.2305 | 4.5041  | 12.1552 | H | 0.0114  | 6.5247  | 11.8266 |

|   |         |         |         |   |        |        |         |
|---|---------|---------|---------|---|--------|--------|---------|
| C | 0.2452  | 7.2203  | 13.7704 | F | 3.7348 | 8.7753 | 12.6276 |
| H | 0.8307  | 6.4815  | 14.0754 | F | 3.3476 | 7.4292 | 14.4864 |
| H | 0.5554  | 8.0568  | 14.1996 | F | 5.2670 | 6.1843 | 14.0793 |
| C | -1.6435 | 5.7753  | 13.7775 | P | 4.4530 | 7.4787 | 13.3918 |
| C | -1.0695 | 4.5259  | 14.1471 | F | 5.1712 | 8.7753 | 14.1561 |
| H | -0.2501 | 4.5041  | 14.6284 | F | 5.5584 | 7.4292 | 12.2973 |
| C | -1.6839 | 3.3798  | 13.8186 | F | 3.6390 | 6.1843 | 12.7044 |
| H | -1.3591 | 2.5570  | 14.1661 | F | 3.7885 | 7.9326 | 12.0187 |
| O | -3.6170 | 11.2072 | 13.0022 | F | 3.3517 | 8.5079 | 13.5811 |
| O | -2.6463 | 9.7980  | 10.9615 | F | 3.4024 | 6.4607 | 13.4865 |
| O | -0.4664 | 8.4459  | 11.8705 |   |        |        |         |
| O | -1.1249 | 6.9497  | 14.1580 |   |        |        |         |

## 9. References

- (S1) Chan, T. R.; Hilgraf, R.; Sharpless, K. B.; Fokin, V. V., Polytriazoles as Copper(I)-Stabilizing Ligands in Catalysis. *Org. Lett.* **2004**, *6*, 2853-2855.
- (S2) Takahashi, Y.; Ito, Ts.; Sakai, S.; Ishii, Y., A novel palladium(0) complex; bis(dibenzylideneacetone)palladium(0). *J. Chem. Soc. D* **1970**, 1065-1066.
- (S3) Naganna, N.; Madhavan, N., Soluble Non-Cross-Linked Poly(norbornene) Supports for Peptide Synthesis with Minimal Reagents. *J. Org. Chem.* **2014**, *79*, 11549-11557.
- (S4) Koreeda, M.; Gopalaswamy, R., Regio- and Stereocontrolled Synthesis of the Bay-Region anti-Diol Epoxide Metabolites of the Potent Carcinogens Benzo[a]pyrene and 7,12-Dimethylbenz[a]anthracene. *J. Am. Chem. Soc.* **1995**, *117*, 10595-10596.
- (S5) Singh, S.; Gill, S.; Sharma, V. K.; Nagrath, S., NADH model studies. Part 2. Cationic hydrogenations using acridan derivatives as hindered NADH models. *J. Chem. Soc., Perkin Trans. 1* **1986**, 1273-1275.
- (S6) Vlasceanu, A.; Jessing, M.; Kilburn J. P., BN/CC isosterism in borazaronaphthalenes towards phosphodiesterase 10A (PDE10A) inhibitors. *Bioorg. Med. Chem.* **2015**, *23*, 4453-4461.
- (S7) Cantrill, S. J.; Youn, G. J.; Stoddart, J. F.; Williams, D. J., Supramolecular Daisy Chains. *J. Org. Chem.* **2001**, *66*, 6857-6872.
- (S8) Blanco, V.; Leigh, D. A.; Marcos, V.; Morales-Serna, J. A.; Nussbaumer, A. L., A Switchable [2]Rotaxane Asymmetric Organocatalyst That Utilizes an Acyclic Chiral Secondary Amine. *J. Am. Chem. Soc.* **2014**, *136*, 4905-4908.
- (S9) Buter, J.; Heijnen, D.; Vila, C.; Hornillos, V.; Otten, E.; Giannerini, M.; Minnaard, A. J.; Feringa, B. L., Palladium-Catalyzed, *tert*-Butyllithium-Mediated Dimerization of Aryl Halides and Its Application in the Atropselective Total Synthesis of Mastigophorene A. *Angew. Chem. Int. Ed.* **2016**, *55*, 3620-3624.
- (S10) Ogoshi, T.; Yamafuji, D.; Aoki, T.; Yamagishi, T.-a., Thermally responsive shuttling behavior of a pillar[6]arene-based [2]rotaxane. *Chem. Commun.* **2012**, *48*, 6842-6844.
- (S11) Chen, S.; Wang, Y.; Nie, T.; Bao, C.; Wang, C.; Xu, T.; Lin, Q.; Qu, D.-H.; Gong, X.; Yang, Y.; Zhu, L.; Tian, H., An Artificial Molecular Shuttle Operates in Lipid Bilayers for Ion Transport. *J. Am. Chem. Soc.* **2018**, *140*, 17992-17998.
- (S12) Melhuish, W. H., Quantum Efficiencies of Fluorescence of Organic Substances: Effect of Solvent and Concentration of the Fluorescent Solute. *J. Phys. Chem.* **1961**, *65*, 229-235.
- (S13) Valeur, B.; Berberan-Santos, M. N., *Molecular Fluorescence. Principles and Applications*, 2nd ed. Wiley-VCH: Weinheim, 2012.
- (S14) Lakowicz, J., *Principles of Fluorescence Spectroscopy*, 3<sup>rd</sup> Ed. Springer-Verlag: New York, 2006.
- (S15) Sheldrick, G. M., SHELXT – Integrated space-group and crystal-structure determination. *Acta Cryst.* **2015**, *A71*, 3-8.
- (S16) (a) Sheldrick, G. M., A short history of SHELX. *Acta Cryst.* **2008**, *A64*, 112-122; (b) Sheldrick, G. M., Crystal structure refinement with SHELXL. *Acta Cryst.* **2015**, *C71*, 3-8.
- (S17) Farrugia, L. J., WinGX and ORTEP for Windows: an update. *J. Appl. Cryst.* **2012**, *45*, 849-854.

- (S18) Spek, A. L., PLATON SQUEEZE: a tool for the calculation of the disordered solvent contribution to the calculated structure factors. *Acta Cryst.* **2015**, *C71*, 9-18.
- (S19) Spek, A. L., Structure validation in chemical crystallography. *Acta Cryst.* **2009**, *D65*, 148-155.
- (S20) The ellipsoid image was generated with the OLEX2 software package: Dolomanov, O. V.; Bourhis, L. J.; Gildea, R. J.; Howard, J. A. K.; Puschmann, H., OLEX2: a complete structure solution, refinement and analysis program. *J. Appl. Cryst.* **2009**, *42*, 339-341.
